# Supplementary material for: Microalgal Metabolic Network Model Refinement through High-Throughput Functional Metabolic Profiling
Source: Front Bioeng Biotechnol. 2014 Dec 10;2:68. doi: 10.3389/fbioe.2014.00068 (PMC4261833; doi:10.3389/fbioe.2014.00068)
Supplement: Table S1 — PM assays for PM01 to PM04 and PM06 to PM08, positive assays are shaded with yellow. [file Data_Sheet1.XLSX]

## Sheet: ST1
PM01 Carbon Sources	PM02 Carbon Sources	PM03 Nitrogen sources	PM04 Phosphorus and Sulfur Sources	PM06 Peptide Nitrogen Sources	PM07 Peptide Nitrogen Sources	PM08 Peptide Nitrogen Sources
A01 (Negative Control)	A01 (Negative Control)	A01 (Negative Control)	A01 (Negative Control)	A01 (Negative Control)	A01 (Negative Control)	A01 (Negative Control)
A02 (L-Arabinose)	A02 (Chondroitin Sulfate C)	A02 (Ammonia)	A02 (Phosphate)	A02 (L-Glutamine)	A02 (L-Glutamine)	A02 (L-Glutamine)
A03 (N-Acetyl-D-Glucosamine)	A03 (a-Cyclodextrin)	A03 (Sodium Nitrite)	A03 (Pyrophosphate)	A03 (Ala-Ala)	A03 (Leu-Ser)	A03 (Ala-Asp)
A04 (D-Saccharic Acid)	A04 (b-Cyclodextrin)	A04 (Sodium Nitrate)	A04 (Trimetaphosphate)	A04 (Ala-Arg)	A04 (Leu-Trp)	A04 (Ala-Gln)
A05 (Succinic Acid)	A05 (g-Cyclodextrin)	A05 (Urea)	A05 (Tripolyphosphate)	A05 (Ala-Asn)	A05 (Leu-Val)	A05 (Ala-Ile)
A06 (D-Galactose)	A06 (Dextrin)	A06 (Biuret)	A06 (Triethyl Phosphate)	A06 (Ala-Glu)	A06 (Lys-Ala)	A06 (Ala-Met)
A07 (L-Aspartic Acid)	A07 (Gelatin)	A07 (L-Alanine)	A07 (Hypophosphite)	A07 (Ala-Gly)	A07 (Lys-Arg)	A07 (Ala-Val)
A08 (L-Proline)	A08 (Glycogen)	A08 (L-Arginine)	A08 (Adenosine-2'-Monophosphate)	A08 (Ala-His)	A08 (Lys-Glu)	A08 (Asp-Ala)
A09 (D-Alanine)	A09 (Inulin)	A09 (L-Asparagine)	A09 (Adenosine-3'-Monophosphate)	A09 (Ala-Leu)	A09 (Lys-Ile)	A09 (Asp-Gln)
A10 (D-Trehalose)	A10 (Laminarin)	A10 (L-Aspartic Acid)	A10 (Adenosine-5'-Monophosphate)	A10 (Ala-Lys)	A10 (Lys-Leu)	A10 (Asp-Gly)
A11 (D-Mannose)	A11 (Mannan)	A11 (L-Cysteine)	A11 (Adenosine-2',3'-Cyclic Monophosphate)	A11 (Ala-Phe)	A11 (Lys-Lys)	A11 (Glu-Ala)
A12 (Dulcitol)	A12 (Pectin)	A12 (L-Glutamic Acid)	A12 (Adenosine-3',5'-Cyclic Monophosphate)	A12 (Ala-Pro)	A12 (Lys-Phe)	A12 (Gly-Asn)
B01 (D-Serine)	B01 (N-Acetyl-D-Galactosamine)	B01 (L-Glutamine)	B01 (Thiophosphate)	B01 (Ala-Ser)	B01 (Lys-Pro)	B01 (Gly-Asp)
B02 (D-Sorbitol)	B02 (N-Acetyl-Neuraminic Acid)	B02 (Glycine)	B02 (Dithiophosphate)	B02 (Ala-Thr)	B02 (Lys-Ser)	B02 (Gly-Ile)
B03 (Glycerol)	B03 (b-D-Allose)	B03 (L-Histidine)	B03 (D,L-a-Glycerol-Phosphate)	B03 (Ala-Trp)	B03 (Lys-Thr)	B03 (His-Ala)
B04 (L-Fucose)	B04 (Amygdalin)	B04 (L-Isoleucine)	B04 (b-Glycerol Phosphate)	B04 (Ala-Tyr)	B04 (Lys-Trp)	B04 (His-Glu)
B05 (D-Glucuronic Acid)	B05 (D-Arabinose)	B05 (L-Leucine)	B05 (Carbamyl Phosphate)	B05 (Arg-Ala)	B05 (Lys-Tyr)	B05 (His-His)
B06 (D-Gluconic Acid)	B06 (D-Arabitol)	B06 (L-Lysine)	B06 (D-2-Phospho-Glyceric Acid)	B06 (Arg-Arg)	B06 (Lys-Val)	B06 (Ile-Asn)
B07 (D,L-a-Glycerol-Phosphate)	B07 (L-Arabitol)	B07 (L-Methionine)	B07 (D-3-Phospho-Glyceric Acid)	B07 (Arg-Asp)	B07 (Met-Arg)	B07 (Ile-Leu)
B08 (D-Xylose)	B08 (Arbutin)	B08 (L-Phenylalanine)	B08 (Guanosine-2'-Monophosphate)	B08 (Arg-Gln)	B08 (Met-Asp)	B08 (Leu-Asn)
B09 (L-Lactic Acid)	B09 (2-Deoxy-D-Ribose)	B09 (L-Proline)	B09 (Guanosine-3'-Monophosphate)	B09 (Arg-Glu)	B09 (Met-Gln)	B09 (Leu-His)
B10 (Sodium Formate)	B10 (m-Erythritol)	B10 (L-Serine)	B10 (Guanosine-5'-Monophosphate)	B10 (Arg-Ile)	B10 (Met-Glu)	B10 (Leu-Pro)
B11 (D-Mannitol)	B11 (D-Fucose)	B11 (L-Threonine)	B11 (Guanosine-2',3'-Cyclic Monophosphate)	B11 (Arg-Leu)	B11 (Met-Gly)	B11 (Leu-Tyr)
B12 (L-Glutamic Acid)	B12 (3-O-b-D-Galactopyranosyl-D-Arabinose)	B12 (L-Tryptophan)	B12 (Guanosine-3',5'-Cyclic Monophosphate)	B12 (Arg-Lys)	B12 (Met-His)	B12 (Lys-Asp)
C01 (D-Glucose-6-Phosphate)	C01 (b-Gentiobiose)	C01 (L-Tyrosine)	C01 (Phosphoenol Pyruvate)	C01 (Arg-Met)	C01 (Met-Ile)	C01 (Lys-Gly)
C02 (D-Galactonic Acid-g-Lactone)	C02 (L-Glucose)	C02 (L-Valine)	C02 (Phospho-Glycolic Acid)	C02 (Arg-Phe)	C02 (Met-Leu)	C02 (Lys-Met)
C03 (D,L-Malic Acid)	C03 (D-Lactitol)	C03 (D-Alanine)	C03 (a-D-Glucose-1-Phosphate)	C03 (Arg-Ser)	C03 (Met-Lys)	C03 (Met-Thr)
C04 (D-Ribose)	C04 (D-Melezitose)	C04 (D-Asparagine)	C04 (D-Glucose-6-Phosphate)	C04 (Arg-Trp)	C04 (Met-Met)	C04 (Met-Tyr)
C05 (Tween 20)	C05 (Maltitol)	C05 (D-Aspartic Acid)	C05 (2-Deoxy-D-Glucose-6-Phosphate)	C05 (Arg-Tyr)	C05 (Met-Phe)	C05 (Phe-Asp)
C06 (L-Rhamnose)	C06 (a-Methyl-D-Glucoside)	C06 (D-Glutamic Acid)	C06 (D-Glucosamine-6-Phosphate)	C06 (Arg-Val)	C06 (Met-Pro)	C06 (Phe-Glu)
C07 (D-Fructose)	C07 (b-Methyl-D-Galactoside)	C07 (D-Lysine)	C07 (6-Phospho-Gluconic Acid)	C07 (Asn-Glu)	C07 (Met-Trp)	C07 (Gln-Glu)
C08 (Acetic Acid)	C08 (3-O-Methyl-D-Glucose)	C08 (D-Serine)	C08 (Cytidine-2'-Monophosphate)	C08 (Asn-Val)	C08 (Met-Val)	C08 (Phe-Met)
C09 (D-Glucose)	C09 (b-Methyl-D-Glucuronic Acid)	C09 (D-Valine)	C09 (Cytidine-3'-Monophosphate)	C09 (Asp-Asp)	C09 (Phe-Ala)	C09 (Phe-Tyr)
C10 (D-Maltose)	C10 (a-Methyl-D-Mannoside)	C10 (L-Citrulline)	C10 (Cytidine-5'-Monophosphate)	C10 (Asp-Glu)	C10 (Phe-Gly)	C10 (Phe-Val)
C11 (D-Melibiose)	C11 (b-Methyl-D-Xylopyranoside)	C11 (L-Homoserine)	C11 (Cytidine-2',3'-Cyclic Monophosphate)	C11 (Asp-Leu)	C11 (Phe-Ile)	C11 (Pro-Arg)
C12 (Thymidine)	C12 (Palatinose)	C12 (L-Ornithine)	C12 (Cytidine-3',5'-Cyclic Monophosphate)	C12 (Asp-Lys)	C12 (Phe-Phe)	C12 (Pro-Asn)
D01 (L-Asparagine)	D01 (D-Raffinose)	D01 (N-Acetyl-L-Glutamic Acid)	D01 (D-Mannose-1-Phosphate)	D01 (Asp-Phe)	D01 (Phe-Pro)	D01 (Pro-Glu)
D02 (D-Aspartic Acid)	D02 (D-Salicin)	D02 (N-Phthaloyl-L-Glutamic Acid)	D02 (D-Mannose-6-Phosphate)	D02 (Asp-Trp)	D02 (Phe-Ser)	D02 (Pro-Ile)
D03 (D-Glucosaminic Acid)	D03 (Sedoheptulosan)	D03 (L-Pyroglutamic Acid)	D03 (Cysteamine-S-Phosphate)	D03 (Asp-Val)	D03 (Phe-Trp)	D03 (Pro-Lys)
D04 (1,2-Propanediol)	D04 (L-Sorbose)	D04 (Hydroxylamine)	D04 (Phospho-L-Arginine)	D04 (Cys-Gly)	D04 (Pro-Ala)	D04 (Pro-Ser)
D05 (Tween 40)	D05 (Stachyose)	D05 (Methylamine)	D05 (O-Phospho-D-Serine)	D05 (Gln-Gln)	D05 (Pro-Asp)	D05 (Pro-Trp)
D06 (a-Keto-Glutaric Acid)	D06 (D-Tagatose)	D06 (N-Amylamine)	D06 (O-Phospho-L-Serine)	D06 (Gln-Gly)	D06 (Pro-Gln)	D06 (Pro-Val)
D07 (a-Keto-Butyric Acid)	D07 (Turanose)	D07 (N-Butylamine)	D07 (O-Phospho-L-Threonine)	D07 (Glu-Asp)	D07 (Pro-Gly)	D07 (Ser-Asn)
D08 (a-Methyl-D-Galactoside)	D08 (Xylitol)	D08 (Ethylamine)	D08 (Uridine-2'-Monophosphate)	D08 (Glu-Glu)	D08 (Pro-Hyp)	D08 (Ser-Asp)
D09 (a-D-Lactose)	D09 (N-Acetyl-D-Glucosaminitol)	D09 (Ethanolamine)	D09 (Uridine-3'-Monophosphate)	D09 (Glu-Gly)	D09 (Pro-Leu)	D09 (Ser-Gln)
D10 (Lactulose)	D10 (g-Amino-n-Butyric Acid)	D10 (Ethylenediamine)	D10 (Uridine-5'-Monophosphate)	D10 (Glu-Ser)	D10 (Pro-Phe)	D10 (Ser-Glu)
D11 (Sucrose)	D11 (d-Amino-Valeric Acid)	D11 (Putrescine)	D11 (Uridine-2',3'-Cyclic Monophosphate)	D11 (Glu-Trp)	D11 (Pro-Pro)	D11 (Thr-Asp)
D12 (Uridine)	D12 (Butyric Acid)	D12 (Agmatine)	D12 (Uridine-3',5'-Cyclic Monophosphate)	D12 (Glu-Tyr)	D12 (Pro-Tyr)	D12 (Thr-Gln)
E01 (L-Glutamine)	E01 (Capric Acid)	E01 (Histamine)	E01 (O-Phospho-D-Tyrosine)	E01 (Glu-Val)	E01 (Ser-Ala)	E01 (Thr-Phe)
E02 (m-Tartaric Acid)	E02 (Caproic Acid)	E02 (b-Phenylethylamine)	E02 (O-Phospho-L-Tyrosine)	E02 (Gly-Ala)	E02 (Ser-Gly)	E02 (Thr-Ser)
E03 (a-D-Glucose-1-Phosphate)	E03 (Citraconic Acid)	E03 (Tyramine)	E03 (Phosphocreatine)	E03 (Gly-Arg)	E03 (Ser-His)	E03 (Trp-Val)
E04 (D-Fructose-6-Phosphate)	E04 (D-Citramalic Acid)	E04 (Acetamide)	E04 (Phosphorylcholine)	E04 (Gly-Cys)	E04 (Ser-Leu)	E04 (Tyr-Ile)
E05 (Tween 80)	E05 (D-Glucosamine)	E05 (Formamide)	E05 (O-Phosphoryl-Ethanolamine)	E05 (Gly-Gly)	E05 (Ser-Met)	E05 (Tyr-Val)
E06 (a-Hydroxy-Glutaric Acid-g-Lactone)	E06 (2-Hydroxy-Benzoic Acid)	E06 (Glucuronamide)	E06 (Phosphono Acetic Acid)	E06 (Gly-His)	E06 (Ser-Phe)	E06 (Val-Ala)
E07 (a-Hydroxy-Butyric Acid)	E07 (4-Hydroxy-Benzoic Acid)	E07 (D,L-Lactamide)	E07 (2-Aminoethyl Phosphonic Acid)	E07 (Gly-Leu)	E07 (Ser-Pro)	E07 (Val-Gln)
E08 (b-Methyl-D-Glucoside)	E08 (b-Hydroxy-Butyric Acid)	E08 (D-Glucosamine)	E08 (Methylene Diphosphonic Acid)	E08 (Gly-Lys)	E08 (Ser-Ser)	E08 (Val-Glu)
E09 (Adonitol)	E09 (g-Hydroxy-Butyric Acid)	E09 (D-Galactosamine)	E09 (Thymidine-3'-Monophosphate)	E09 (Gly-Met)	E09 (Ser-Tyr)	E09 (Val-Lys)
E10 (Maltotriose)	E10 (a-Keto-Valeric Acid)	E10 (D-Mannosamine)	E10 (Thymidine-5'-Monophosphate)	E10 (Gly-Phe)	E10 (Ser-Val)	E10 (Val-Met)
E11 (2'-Deoxy-Adenosine)	E11 (Itaconic Acid)	E11 (N-Acetyl-D-Glucosamine)	E11 (Inositol Hexaphosphate)	E11 (Gly-Pro)	E11 (Thr-Ala)	E11 (Val-Phe)
E12 (Adenosine)	E12 (5-Keto-D-Gluconic Acid)	E12 (N-Acetyl-D-Galactosamine)	E12 (Thymidine 3',5'-Cyclic Monophosphate)	E12 (Gly-Ser)	E12 (Thr-Arg)	E12 (Val-Pro)
F01 (Gly-Asp)	F01 (D-Lactic Acid Methyl Ester)	F01 (N-Acetyl-b-D-Mannosamine)	F01 (Negative Control)	F01 (Gly-Thr)	F01 (Thr-Glu)	F01 (Val-Ser)
F02 (Citric Acid)	F02 (Malonic Acid)	F02 (Adenine)	F02 (Sulfate)	F02 (Gly-Trp)	F02 (Thr-Gly)	F02 (b-Ala-Ala)
F03 (myo-Inositol)	F03 (Melibionic Acid)	F03 (Adenosine)	F03 (Sodium Thiosulfate)	F03 (Gly-Tyr)	F03 (Thr-Leu)	F03 (b-Ala-Gly)
F04 (D-Threonine)	F04 (Oxalic Acid)	F04 (Cytidine)	F04 (Tetrathionate)	F04 (Gly-Val)	F04 (Thr-Met)	F04 (b-Ala-His)
F05 (Fumaric Acid)	F05 (Oxalomalic Acid)	F05 (Cytosine)	F05 (Thiophosphate)	F05 (His-Asp)	F05 (Thr-Pro)	F05 (Met-b-Ala)
F06 (Bromo-Succinic Acid)	F06 (Quinic Acid)	F06 (Guanine)	F06 (Dithiophosphate)	F06 (His-Gly)	F06 (Trp-Ala)	F06 (b-Ala-Phe)
F07 (Propionic Acid)	F07 (D-Ribono-1,4-Lactone)	F07 (Guanosine)	F07 (L-Cysteine)	F07 (His-Leu)	F07 (Trp-Arg)	F07 (D-Ala-D-Ala)
F08 (Mucic Acid)	F08 (Sebacic Acid)	F08 (Thymine)	F08 (D-Cysteine)	F08 (His-Lys)	F08 (Trp-Asp)	F08 (D-Ala-Gly)
F09 (Glycolic Acid)	F09 (Sorbic Acid)	F09 (Thymidine)	F09 (Cys-Gly)	F09 (His-Met)	F09 (Trp-Glu)	F09 (D-Ala-Leu)
F10 (Glyoxylic Acid)	F10 (Succinamic Acid)	F10 (Uracil)	F10 (L-Cysteic Acid)	F10 (His-Pro)	F10 (Trp-Gly)	F10 (D-Leu-D-Leu)
F11 (D-Cellobiose)	F11 (D-Tartaric Acid)	F11 (Uridine)	F11 (Cysteamine)	F11 (His-Ser)	F11 (Trp-Leu)	F11 (D-Leu-Gly)
F12 (Inosine)	F12 (L-Tartaric Acid)	F12 (Inosine)	F12 (L-Cysteine Sulfinic Acid)	F12 (His-Trp)	F12 (Trp-Lys)	F12 (D-Leu-Tyr)
G01 (Gly-Glu)	G01 (Acetamide)	G01 (Xanthine)	G01 (N-Acetyl-L-Cysteine)	G01 (His-Tyr)	G01 (Trp-Phe)	G01 (g-Glu-Gly)
G02 (Tricarballylic Acid)	G02 (L-Alaninamide)	G02 (Xanthosine)	G02 (S-Methyl-L-Cysteine)	G02 (His-Val)	G02 (Trp-Ser)	G02 (g-D-Glu-Gly)
G03 (L-Serine)	G03 (N-Acetyl-L-Glutamic Acid)	G03 (Uric Acid)	G03 (Cystathionine)	G03 (Ile-Ala)	G03 (Trp-Trp)	G03 (Gly-D-Ala)
G04 (L-Threonine)	G04 (L-Arginine)	G04 (Alloxan)	G04 (Lanthionine)	G04 (Ile-Arg)	G04 (Trp-Tyr)	G04 (Gly-D-Asp)
G05 (L-Alanine)	G05 (Glycine)	G05 (Allantoin)	G05 (Glutathione)	G05 (Ile-Gln)	G05 (Tyr-Ala)	G05 (Gly-D-Ser)
G06 (Ala-Gly)	G06 (L-Histidine)	G06 (Parabanic Acid)	G06 (D,L-Ethionine)	G06 (Ile-Gly)	G06 (Tyr-Gln)	G06 (Gly-D-Thr)
G07 (Acetoacetic Acid)	G07 (L-Homoserine)	G07 (D,L-a-Amino-Butyric Acid)	G07 (L-Methionine)	G07 (Ile-His)	G07 (Tyr-Glu)	G07 (Gly-D-Val)
G08 (N-Acetyl-b-D-Mannosamine)	G08 (4-Hydroxy-L-Proline [trans])	G08 (g-Amino-n-Butyric Acid)	G08 (D-Methionine)	G08 (Ile-Ile)	G08 (Tyr-Gly)	G08 (Leu-b-Ala)
G09 (Mono-Methyl Succinate)	G09 (L-Isoleucine)	G09 (e-Amino-N-Caproic Acid)	G09 (Gly-Met)	G09 (Ile-Met)	G09 (Tyr-His)	G09 (Leu-D-Leu)
G10 (Methyl Pyruvate)	G10 (L-Leucine)	G10 (D,L-a-Amino-Caprylic Acid)	G10 (N-Acetyl-D,L-Methionine)	G10 (Ile-Phe)	G10 (Tyr-Leu)	G10 (Phe-b-Ala)
G11 (D-Malic Acid)	G11 (L-Lysine)	G11 (d-Amino-Valeric Acid)	G11 (L-Methionine Sulfoxide)	G11 (Ile-Pro)	G11 (Tyr-Lys)	G11 (Ala-Ala-Ala)
G12 (L-Malic Acid)	G12 (L-Methionine)	G12 (L-Norvaline)	G12 (L-Methionine Sulfone)	G12 (Ile-Ser)	G12 (Tyr-Phe)	G12 (D-Ala-Gly-Gly)
H01 (Gly-Pro)	H01 (L-Ornithine)	H01 (Ala-Asp)	H01 (L-Djenkolic Acid)	H01 (Ile-Trp)	H01 (Tyr-Trp)	H01 (Gly-Gly-Ala)
H02 (p-Hydroxy-Phenylacetic Acid)	H02 (L-Phenylalanine)	H02 (Ala-Gln)	H02 (Thiourea)	H02 (Ile-Tyr)	H02 (Tyr-Tyr)	H02 (Gly-Gly-D-Leu)
H03 (m-Hydroxy-Phenylacetic Acid)	H03 (L-Pyroglutamic Acid)	H03 (Ala-Glu)	H03 (1-Thio-b-D-Glucose)	H03 (Ile-Val)	H03 (Val-Arg)	H03 (Gly-Gly-Gly)
H04 (Tyramine)	H04 (L-Valine)	H04 (Ala-Gly)	H04 (D,L-Lipoamide)	H04 (Leu-Ala)	H04 (Val-Asn)	H04 (Gly-Gly-Ile)
H05 (D-Psicose)	H05 (D,L-Carnitine)	H05 (Ala-His)	H05 (Taurocholic Acid)	H05 (Leu-Arg)	H05 (Val-Asp)	H05 (Gly-Gly-Leu)
H06 (L-Lyxose)	H06 (Butylamine [sec])	H06 (Ala-Leu)	H06 (Taurine)	H06 (Leu-Asp)	H06 (Val-Gly)	H06 (Gly-Gly-Phe)
H07 (Glucuronamide)	H07 (D,L-Octopamine)	H07 (Ala-Thr)	H07 (Hypotaurine)	H07 (Leu-Glu)	H07 (Val-His)	H07 (Val-Tyr-Val)
H08 (Pyruvic Acid)	H08 (Putrescine)	H08 (Gly-Asn)	H08 (p-Amino Benzene Sulfonic Acid)	H08 (Leu-Gly)	H08 (Val-Ile)	H08 (Gly-Phe-Phe)
H09 (L-Galactonic Acid-g-Lactone)	H09 (Dihydroxy-Acetone)	H09 (Gly-Gln)	H09 (Butane Sulfonic Acid)	H09 (Leu-Ile)	H09 (Val-Leu)	H09 (Leu-Gly-Gly)
H10 (D-Galacturonic Acid)	H10 (2,3-Butanediol)	H10 (Gly-Glu)	H10 (2-Hydroxyethane Sulfonic Acid)	H10 (Leu-Leu)	H10 (Val-Tyr)	H10 (Leu-Leu-Leu)
H11 (b-Phenylethylamine)	H11 (2,3-Butanedione)	H11 (Gly-Met)	H11 (Methane Sulfonic Acid)	H11 (Leu-Met)	H11 (Val-Val)	H11 (Phe-Gly-Gly)
H12 (Ethanolamine)	H12 (3-Hydroxy-2-Butanone)	H12 (Met-Ala)	H12 (Tetramethylene Sulfone)	H12 (Leu-Phe)	H12 (g-Glu-Gly)	H12 (Tyr-Gly-Gly)

## Sheet: ST2
Biolog Chemical	Pathways	Reactions	Proteins	EC	Comment	Phytozome version 10.0.2(http://phytozome.jgi.doe.gov/pz/portal.html#!info?alias=Org_Creinhardtii)	JGI version 4 (Ghamsari et al., 2011)	Augustus version 5.0 (Chang et al. 2011)	KEGG (http://www.genome.jp/kegg/kegg1.html)	JGI v3.1 (Manichaikul et al., 2009)	Gene Name	Predicted Compartment(Plant)	Predicted Compartment(Animal)	PS BLAST Genes	Match or not
Cysteamine-S-Phosphate		cysteamine S-phosphate[periplasmic space] + H2O[periplasmic space] → cysteamine[periplasmic space] + phosphate[periplasmic space]	Protein(AAC73486.2): alkaline phosphatase (cysteamine S-phosphate phosphatase) - Escherichia coli	3.1.3.1	http://asap.ahabs.wisc.edu/asap/feature_info.php?FeatureID=ABE-0001328	-	+	+	+	+	JLM_162926	Nucleus, Chloroplast, Cytosol, Mitochondrion, Plasma	Nucleus, Cytosol
			Swiss-Prot Accession Number: P00634
			GenBank Accession Number: U00096.3
Tetrathionate	tetrathionate oxidation		tetrathionate decomposing enzyme - Acidithiobacillus ferrooxidans	1.8.2.2	thiosulfate dehydrogenase (tetrathionate synthase)	-	-	-	-	-
	tetrathionate reduction I (to thiosulfate)		tetrathionate hydrolase - Acidithiobacillus ferrooxidans	1.8.5.2	thiosulfate dehydrogenase (quinone) (thiosulfate oxidoreductase, tetrathionate-forming)	-	-	-	-	-
	tetrathionate reductiuon II (to trithionate)		tetrathionate hydrolase monomer - Acidithiobacillus ferrooxidans
	Class: Tetrathionate Oxidation		tetrathionate reductase α subunit - Salmonella enterica
	Class: Tetrathionate Reduction		tetrathionate reductase β subunit - Salmonella enterica
	superpathway of tetrathionate reduction (Salmonella typhimurium)		tetrathionate reductase γ subunit - Salmonella enterica
	thiosulfate oxidation I (to tetrathionate)		tetrathionate reductase - Salmonella enterica
	thiosulfate oxidation II (to tetrathionate		tetrathionate reductase - Shewanella oneidensis
			thiosulfate dehydrogenase (tetrathionate synthase) - Thermithiobacillus tepidarius
			thiosulfate dehydrogenase / tetrathionate reductase - Campylobacter jejuni
D-Alanine	pyruvate fermentation to acetate and alanine	2-oxoglutarate + D-alanine ↔ D-glutamate + pyruvate	D-alanine--D-alanine ligase - Mycobacterium tuberculosis	1.4.1.1	alanine dehydrogenase	-	-	-	-	-				ref|XP_001700222.1| NAD(P) transhydrogenase [Chlamydomonas re... (1e-24)	No
														gb|ABY77748.1| putative D-lactate dehydrogenase [Chlamydomona... (3e-04)	No
		D-alanine + 5,10-methylenetetrahydrofolate + H2O = 2-methylserine + tetrahydrofolate	D-alanine--D-alanine ligase - Staphylococcus aureus	1.5.1.22	strombine dehydrogenase	-	-	-	-	-		Chloroplast, Endoplasmic reticulum, Nucleus, Cytosol, plasma, Cytoskeleton	Cytosol, Nucleus, Plasma, Peroxisome, Mitochondrion, Extracellular, Mitochondrion,Endoplasmic reticulum	ref|XP_001694461.1| predicted protein [Chlamydomonas reinhard... (2e-64)	No
		D-alanine + L-glutamine = ammonium + γ-L-glutamyl-D-alanine	D-alanine--D-lactate ligase monomer - Enterococcus faecium	2.1.2.7	D-alanine 2-hydroxymethyltransferase	-	-	-	-	-
			D-alanine-D-alanine ligase A - Escherichia coli	2.3.2.10	UDP-N-acetylmuramoylpentapeptide-lysine N6-alanyltransferase	-	-	-	-	-
			D-alanine-D-alanine ligase B - Escherichia coli (polypeptide)	2.3.2.14	D-alanine γ-glutamyltransferase	-	-	-	-	-
			D-alanine-D-alanine ligase B - Escherichia coli (protein complex)	2.3.2.16	lipid II:glycine glycyltransferase	-	-	-	-	-
			D-alanine:D-alanine ligase - Staphylococcus aureus	2.3.2.17	N-acetylmuramoyl-L-alanyl-D-glutamyl-L-lysyl-(N6-glycyl)-D-alanyl-D-alanine-diphosphoundecaprenyl-N-acetylglucosamine:glycine glycyltransferase	-	-	-	-	-
				2.3.2.18	N-acetylmuramoyl-L-alanyl-D-glutamyl-L-lysyl-(N6-triglycine)-D-alanyl-D-alanine-diphosphoundecaprenyl-N-acetylglucosamine:glycine glycyltransferase	-	-	-	-	-
				2.6.1.21	D-amino-acid transaminase	-	-	-	-	-		chloroplast, Mitochondrion	Mitochondrion, Nucleus, Cytosol	ref|XP_001698572.1| branched chain amino acid aminotransferas... (1e-20)	Yes
														ref|XP_001693532.1| aminotransferase [Chlamydomonas reinhardtii] (9e-14)	Yes
														ref|XP_001701890.1| branched chain amino acid aminotransferas... (3e-08)	Yes
														ref|XP_001700930.1| branched-chain amino acid aminotransferas... (1e-05)	Yes
				3.4.13.22	D-Ala-D-Ala dipeptidase	-	-	-	-	-
		2 a peptidoglycan dimer (meso-diaminopimelate containing)[periplasmic space] → a peptidoglycan with D,D cross-links (meso-diaminopimelate containing)[periplasmic space] + D-alanine[periplasmic space] a lipid II[periplasmic space] + H2O[periplasmic space] → a N-acetylglucosamine--N-acetylmuramyl-(tetrapeptide) pyrophosphoryl-undecaprenol[periplasmic space] + D-alanine[periplasmic space]	a lipid II[periplasmic space] + H2O[periplasmic space] → a N-acetylglucosamine--N-acetylmuramyl-(tetrapeptide) pyrophosphoryl-undecaprenol[periplasmic space] + D-alanine[periplasmic space]	3.4.16.4	serine-type D-Ala-D-Ala carboxypeptidase	-	+	+	-	+	Chlre2_kg.scaffold_14000039
				3.4.17.8	muramoylpentapeptide carboxypeptidase	-	-	-	-	-				ref|XP_001692004.1| predicted protein [Chlamydomonas reinhard... (6e-04)	No
				3.4.17.13	muramoyltetrapeptide carboxypeptidase	-	-	-	-	-
				3.4.17.14	zinc D-Ala-D-Ala carboxypeptidase	-	-	-	-	-
				4.5.1.2	3-chloro-D-alanine dehydrochlorinase	-	-	-	-	-
				6.1.1.13	D-alanine—poly(phosphoribitol) ligase	-	-	-	-	-				ref|XP_001702039.1| acetyl CoA synthetase [Chlamydomonas rein... (7e-07)	No
														ref|XP_001700230.1| acetyl CoA synthetase [Chlamydomonas rein... (8e-07)	No
														ref|XP_001693857.1| predicted protein [Chlamydomonas reinhard... (8e-06)	No
														ref|XP_001691289.1| long-chain-fatty-acid CoA ligase [Chlamyd... (1e-05)	No
														ref|XP_001700210.1| acetyl CoA synthetase [Chlamydomonas rein... (1e-04)	No
														ref|XP_001702947.1| predicted protein [Chlamydomonas reinhard... (0.004)	No
				6.1.2.1	D-alanine—(R)-lactate ligase	-	-	-	-	-				ref|XP_001693824.1| predicted protein [Chlamydomonas reinhard... (0.005)	No
				6.3.2.4	D-alanine—D-alanine ligase	-	+	+	-	+	au.g14655_t1	Cytosol, Chloroplast, Mitochondrion	Mitochondrion, Cytosol, Nucleus, Peroxisome
				6.3.2.10	UDP-N-acetylmuramoyl-tripeptide—D-alanyl-D-alanine ligase	-	-	-	-	-				ref|XP_001696935.1| hypothetical protein CHLREDRAFT_192674 [C... ( 0.004)	No
				6.3.2.16	D-alanine—alanyl-poly(glycerolphosphate) ligase	-	-	-	-	-
		a D-amino acid + oxygen + H2O → ammonium + hydrogen peroxide + a 2-oxo carboxylate		1.4.3.3	D-amino-acid oxidase	+	-	-	-	-	Cre02.g096350.t1.3
				6.3.2.35	D-alanine—D-serine ligase	-	-	-	-	-
D-Asparagine	superpathway of aspartate and asparagine biosynthesis; interconversion of aspartate and asparagine	an electron-transfer-related quinone + a D-amino acid + H2O → an electron-transfer-related quinol + a 2-oxo carboxylate + ammonium		1.4.5.1	D-amino acid dehydrogenase (quinone)	-	-	-	-	-
		a D-amino acid + oxygen + H2O → ammonium + hydrogen peroxide + a 2-oxo carboxylate		1.4.3.3	D-amino-acid oxidase	+	-	-	-	-	Cre02.g096350.t1.3
		a D-aminoacyl-tRNA + H2O → a D-amino acid + a tRNA + 2 H+		3.1.1.96		-	-	-	-	-
		acetyl-CoA + a D-amino acid = an N-acetyl-D-amino acid + coenzyme A + H+		2.3.1.36	D-amino-acid N-acetyltransferase	-	-	-	-	-
		a D-amino acid + an oxidized electron acceptor + H2O = a 2-oxo carboxylate + ammonium + a reduced electron acceptor		1.4.99.1	D-amino-acid dehydrogenase	-	-	-	-	-
		an N-carbamoyl D-amino acid + H+ + H2O = a D-amino acid + ammonium + CO2		3.5.1.77	N-carbamoyl-D-amino-acid hydrolase	-	+	+	-	-	e_gwW.1.243.1
		an N-acylated-D-amino acid + H2O = a D-amino acid + a carboxylate		3.5.1.81	N-acyl-D-amino-acid deacylase	-	-	-	-	-		Cytosol, Peroxisome, Mitochondrion	Cytosol, Peroxisome,Mitochondrion, Plasma
		an L-amino acid = a D-amino acid		5.1.1.10	amino-acid racemase	-	-	-	-	-				ref|XP_001701454.1| cysteine synthase [Chlamydomonas reinhard... (5e-04)	Yes
D-Aspartic Acid		undecaprenyldiphospho-N-acetyl-(N-acetylglucosaminyl)muramoyl-L-alanyl-γ-D-glutamyl-L-lysyl-D-alanyl-D-alanine + D-aspartate + ATP → N-acetylmuramoyl-L-alanyl-D-glutamyl-N-(β-D-asparatyl)-L-lysyl-D-alanyl-D-alanine-diphosphoundecaprenyl-N-acetylglucosamine + ADP + phosphate + H+		6.3.1.12	D-aspartate ligase	-	-	-	-	-
		a D-amino acid + oxygen + H2O → ammonium + hydrogen peroxide + a 2-oxo carboxylate		1.4.3.3	D-amino-acid oxidase	+	-	-	-	-	Cre02.g096350.t1.3
D-Glutamic Acid		D-glutamate + oxygen + H2O → ammonium + hydrogen peroxide + 2-oxoglutarate		1.4.3.7	D-glutamate oxidase	-	-	-	-	-
		a D-amino acid + oxygen + H2O → ammonium + hydrogen peroxide + a 2-oxo carboxylate		1.4.3.3	D-amino-acid oxidase	+	-	-	-	-	Cre02.g096350.t1.3
D-Lysine		D-lysine = 2,5-diaminohexanoate	D-lysine oxidase - Pseudomonas putida	5.4.3.4	D-lysine 5,6-aminomutase	-	-	-	-	-
		a D-amino acid + oxygen + H2O → ammonium + hydrogen peroxide + a 2-oxo carboxylate		1.4.3.3	D-amino-acid oxidase	+	-	-	-	-	Cre02.g096350.t1.3
		UDP-N-acetylmuramoyl-L-alanyl--D-glutamate + D-lysine + ATP → UDP-N-acetylmuramoyl-L-alanyl-γ-D-glutamyl-D-lysine + ADP + phosphate + H+	UDP-N-acetylmuramoyl-L-alanyl-D-glutamate--LD-lysine ligase - Thermotoga maritima	6.3.2.37	UDP-N-acetylmuramoyl-L-alanyl-D-glutamate—D-lysine ligase	-	-	-	-	-				ref|XP_001696935.1| hypothetical protein CHLREDRAFT_192674 [C... (5e-22)	No
D-Serine	D-serine degradation	Fas-activated serine/threonine protein + ATP = Fas-activated serine/threonine phosphoprotein + ADP	D-serine ammonia-lyase - Escherichia coli	2.7.11.8	Fas-activated serine/threonine kinase	-	-	-	-	-
	serine racemization (D serine biosynthesis)	ATP + a protein = ADP + a phosphoprotein	D-serine ammonia-lyase - Gallus gallus	2.7.11.17	Ca2+/calmodulin-dependent protein kinase	+	+	+	+	+	Cre12.g486350.t1.3 or Cre07.g327350.t1.2 or Cre01.g034900.t1.2 or Cre03.g153150.t1.2 or Cre10.g457700.t1.2 or Cre17.g705350.t1.3 or Cre10.g428650.t1.2 or Cre01.g029500.t1.2
	vancomycin resistance II (D-ala-D-serine biosynthesis)	a protein + H2O → a peptide + a peptide	D-serine ammonia-lyase subunit - Gallus gallus	3.4.21.78	granzyme A	-	-	-	-	-				ref|XP_001701085.1| hypothetical protein CHLREDRAFT_107386 [C... (2e-11)	No
														ref|XP_001698621.1| hypothetical protein CHLREDRAFT_143218 [C... (5e-06)	No
		complement component protein C4 + H2O → complement component protein C4a + complement component protein C4b ,	O-ureido-D-serine cyclase - Streptomyces lavendulae	3.4.21.104	mannan-binding lectin-associated serine protease-2	-	-	-	-	-				ref|XP_001698335.1| hypothetical protein CHLREDRAFT_187642 [C... (0.001)	No
														ref|XP_001700336.1| zinc-metallopeptidase-like protein [Chlam... (1e-22)	No
														ref|XP_001697121.1| exostosin-like glycosyltransferase [Chlam... (0.002)	No
		D-serine → pyruvate + ammonium	Class: Fas-activated serine/threonine phosphoprotein	4.3.1.18	D-serine ammonia-lyase	-	-	-	+	-	g6244.t1			ref|XP_001695545.1| hypothetical protein CHLREDRAFT_175110 [C... (4e-08)	No
														ref|XP_001701454.1| cysteine synthase [Chlamydomonas reinhard... (0.004)	No
		D-alanine + D-serine + ATP → D-alanyl-D-serine + ADP + phosphate + H+	Class: Fas-activated serine/threonine protein	6.3.2.35	D-alanine—D-serine ligase	-	-	-	-	-
		O-ureido-D-serine + ATP + H+ + H2O → D-cycloserine + CO2 + ammonium + ADP + phosphate	D-alanyl-D-serine	6.3.3.5	O-ureido-D-serine cyclo-ligase	-	-	-	-	-
			serine / alanine / glycine / cycloserine:H+symporter (transport of D-serine) - Escherichia coli
			serine racemase (D-serine ammonia-lyase (pyruvate-forming)) - Arabidopsis thaliana
			serine racemase (D-serine ammonia-lyase (pyruvate-forming)) - Hordeum vulgare
			serine racemase (D-serine ammonia-lyase (pyruvate-forming)) - Oryza sativa
			VanC1 D-alanine--D-serine ligase - Enterococcus gallinarum
			VanC1 D-alanine--D-serine ligase monomer - Enterococcus gallinarum
			VanC2 D-alanine--D-serine ligase monomer - Enterococcus casseliflavus
			VanC2/3 D-alanine--D-serine ligase - Enterococcus casseliflavus
			VanC4 D-alanine--D-serine ligase - Enterococcus casseliflavus
			VanC4 D-alanine--D-serine ligase monomer - Enterococcus casseliflavus
			VanE D-alanine--D-serine ligase - Enterococcus faecalis
			VanE D-alanine--D-serine ligase monomer - Enterococcus faecalis
			VanG D-Alanine--D-Serine ligase - Enterococcus faecalis
			VanG D-Alanine--D-Serine ligase monomer - Enterococcus faecalis
		a D-amino acid + oxygen + H2O → ammonium + hydrogen peroxide + a 2-oxo carboxylate		1.4.3.3	D-amino-acid oxidase	+	-	-	-	-	Cre02.g096350.t1.3
D-Valine		N-[(5S)-5-amino-5-carboxypentanoyl]-L-cysteinyl-D-valine + oxygen → isopenicillin N + 2 H2O	δ-(L-α-aminoadipyl)-L-cysteinyl-D-valine synthetase - Penicillium chrysogenum	1.21.3.1	isopenicillin-N synthase	-	-	-	-	-				ref|XP_001698645.1| oxygenase-like protein [Chlamydomonas rei... (2e-12)	No
														ref|XP_001695234.1| Fe/2-OG dependent oxidoreductase [Chlamyd... (1e-04)	No
		L-2-aminoadipate + L-cysteine + L-valine + 3 ATP + H2O → N-[(5S)-5-amino-5-carboxypentanoyl]-L-cysteinyl-D-valine + 3 AMP + 3 diphosphate + 3 H+	jasmonoyl-amino acid synthetase (jasmonic acid-valine synthetase) - Nicotiana attenuata (polypeptide) - JAR4	6.3.2.26	N-(5-amino-5-carboxypentanoyl)-L-cysteinyl-D-valine synthase	-	-	-	-	-				ref|XP_001702039.1| acetyl CoA synthetase [Chlamydomonas rein... (4e-13)	No
														ref|XP_001700210.1| acetyl CoA synthetase [Chlamydomonas rein... (9e-12)	No
														ref|XP_001700230.1| acetyl CoA synthetase [Chlamydomonas rein... (4e-10)	No
														ref|XP_001702947.1| predicted protein [Chlamydomonas reinhard... (1e-05)	No
														ref|XP_001691289.1| long-chain-fatty-acid CoA ligase [Chlamyd... (2e-05)	No
														ref|XP_001693857.1| predicted protein [Chlamydomonas reinhard... (0.001)	No
														ref|XP_001693692.1| predicted protein [Chlamydomonas reinhard... (0.003)	No
			jasmonoyl-amino acid synthetase (jasmonic acid-valine synthetase) - Nicotiana attenuata (polypeptide) - JAR6
		a D-amino acid + oxygen + H2O → ammonium + hydrogen peroxide + a 2-oxo carboxylate		1.4.3.3	D-amino-acid oxidase	+	-	-	-	-	Cre02.g096350.t1.3
L-Pyroglutamic Acid
Thiophosphate
Dithiophosphate
Ethylamine		ethylamine + L-glutamate + ATP → γ-glutamyl-ethylamide + ADP + phosphate + H+		6.3.1.6	glutamate—ethylamine ligase	-	-	-	-	-
D,L-a-Amino-Butyric Acid				2.1.1.49	amine N-methyltransferase	-	-	-	-	-
		a D-amino acid + oxygen + H2O → ammonium + hydrogen peroxide + a 2-oxo carboxylate		1.4.3.3	D-amino-acid oxidase	+	-	-	-	-	Cre02.g096350.t1.3
Di-Peptides		a dipeptide + H2O -> 2 a standard amino acid		3.4.13.18	cytosol nonspecific dipeptidase	+	-	-	-	-	Cre02.g078650.t1.3
Tri-peptides		a tripeptide + H2O → a dipeptide + a standard α amino acid		3.4.11.4	tripeptide aminopeptidase	+	-	-	-	-	Cre16.g675350.t1.3
D-amino Acids (racemase)		D-amino acid <->L-amino acid		5.1.1.10	amino-acid racemase	-	-	-	-	-				ref|XP_001698112.1| serine/threonine dehydratase [Chlamydomon... (2e-87)	Yes

## Sheet: ST3
Shadow Prices for Biomass Objective Function (Maximum value 0.1533) At Light no acetate
Metabolites	iRC1080	iBD1093	Difference	if (Differnce >=0.001,"Change","No Effect"
10fthf[c]	-6.76513e-17	8.67275e-17	1.54379e-16	No Effect
10fthf[h]	-0.0653806	-0.0653806	1.09635e-15	No Effect
10fthf[m]	-2.08167e-16	1.45717e-16	3.53884e-16	No Effect
10fthf[x]	-6.76513e-17	8.67275e-17	1.54379e-16	No Effect
10fthfglu-L[c]	-0.0840608	-0.0840608	9.71445e-17	No Effect
10fthfglu-L[m]	-0.0747207	-0.0747207	2.08167e-16	No Effect
12dgr160[h]	-0.513705	-0.513705	6.99441e-15	No Effect
12dgr16018111Z[c]	-0.574416	-0.574416	7.99361e-15	No Effect
12dgr1601819Z[c]	-0.541725	-0.541725	7.99361e-15	No Effect
12dgr1601819Z[h]	-0.560405	-0.560405	6.99441e-15	No Effect
12dgr1801819Z[c]	-0.588426	-0.588426	7.99361e-15	No Effect
12dgr1801819Z[h]	-0.607106	-0.607106	6.99441e-15	No Effect
12dgr18111Z160[h]	-0.593096	-0.593096	6.99441e-15	No Effect
12dgr18111Z18111Z[c]	-0.653806	-0.653806	7.99361e-15	No Effect
12dgr18111Z1819Z[c]	-0.621116	-0.621116	7.99361e-15	No Effect
12dgr18111Z1819Z[h]	-0.639796	-0.639796	6.99441e-15	No Effect
12dgr1819Z160[h]	-0.560405	-0.560405	6.99441e-15	No Effect
12dgr1819Z1619Z[h]	-0.593096	-0.593096	6.99441e-15	No Effect
12dgr1819Z18111Z[c]	-0.621116	-0.621116	7.99361e-15	No Effect
12dgr1819Z18111Z[h]	0	-0.639796	0.639796	Change
12dgr1819Z1819Z[c]	-0.588426	-0.588426	7.99361e-15	No Effect
12dgr1819Z1819Z[h]	-0.607106	-0.607106	5.9952e-15	No Effect
12dmpo[c]	-0.121421	-0.121421	9.99201e-16	No Effect
13dampp[h]	-0.0653806	-0.0653806	1.94289e-16	No Effect
13dpg[c]	-0.0560405	-0.0560405	1.04083e-16	No Effect
13dpg[f]	0.0373604	0.0373604	2.01228e-16	No Effect
13dpg[h]	-0.0653806	-0.0653806	2.91434e-16	No Effect
13dpg[m]	-0.0467004	-0.0467004	9.71445e-17	No Effect
13oocdcy1829Z11Ea[c]	-0.270863	-0.270863	3.9968e-15	No Effect
13Shocdcy1829Z11Ea[c]	-0.270863	-0.270863	3.9968e-15	No Effect
13Shpocdcy1829Z11Ea[c]	-0.270863	-0.270863	3.9968e-15	No Effect
1acpc[c]	-0.0560405	-0.0560405	2.98372e-16	No Effect
1acpc[h]	-0.0560405	-0.0560405	2.98372e-16	No Effect
1acpc[m]	-0.0560405	-0.0560405	2.98372e-16	No Effect
1agpe180[c]	-0.373604	-0.373604	2.9976e-15	No Effect
1agpe18111Z[c]	-0.406294	-0.406294	3.9968e-15	No Effect
1agpe1819Z[c]	-0.373604	-0.373604	2.9976e-15	No Effect
1agpe1829Z12Z[c]	-0.373604	-0.373604	4.996e-15	No Effect
1btol[c]	0	0	0	No Effect
1Dgali[c]	-0.214822	-0.214822	9.99201e-16	No Effect
1Dgali[h]	-0.102741	-0.102741	9.99201e-16	No Effect
1hdecg3p[c]	-0.270863	-0.270863	3.9968e-15	No Effect
1hdecg3p[h]	-0.298883	-0.298883	2.9976e-15	No Effect
1odec11eg3p[c]	-0.350253	-0.350253	3.9968e-15	No Effect
1odec11eg3p[h]	-0.378274	-0.378274	2.9976e-15	No Effect
1odec9eg3p[c]	-0.317563	-0.317563	3.9968e-15	No Effect
1odec9eg3p[h]	-0.345583	-0.345583	2.9976e-15	No Effect
1odecg3p[c]	-0.317563	-0.317563	3.9968e-15	No Effect
1odecg3p[h]	-0.345583	-0.345583	3.9968e-15	No Effect
1pyr5c[c]	-0.0840608	-0.0840608	1.94289e-16	No Effect
1pyr5c[m]	-0.0840608	-0.0840608	4.996e-16	No Effect
23dhdp[c]	-0.0934009	-0.0934009	3.88578e-16	No Effect
23dhmb[c]	-0.0747207	-0.0747207	4.996e-16	No Effect
23dhmb[h]	-0.0747207	-0.0747207	4.996e-16	No Effect
23dhmb[m]	-0.0747207	-0.0747207	4.996e-16	No Effect
23dhmp[c]	-0.102741	-0.102741	9.99201e-16	No Effect
23dhmp[h]	-0.102741	-0.102741	9.99201e-16	No Effect
25aics[c]	-0.242842	-0.242842	9.99201e-16	No Effect
25aics[h]	-0.233502	-0.233502	9.99201e-16	No Effect
25dhpp[h]	-7.45931e-17	0.168122	0.168122	Change
25hvitd3[c]	-1.17009e-16	9.93477e-17	2.16357e-16	No Effect
26dap-LL[c]	-0.0934009	-0.0934009	6.10623e-16	No Effect
26dap-M[c]	-0.0934009	-0.0934009	6.10623e-16	No Effect
26dmani[e]	0	0	0	No Effect
2ahbut[h]	-0.0934009	-0.0934009	6.10623e-16	No Effect
2ahethmpp[h]	0	0	0	No Effect
2ahethmpp[m]	0	0	0	No Effect
2ahhmd[c]	-0.00934009	-0.00934009	1.99493e-16	No Effect
2ahhmp[c]	0	0	0	No Effect
2aobut[x]	-0.0467004	-0.0467004	4.02456e-16	No Effect
2cpr5p[h]	-0.224162	-0.224162	0	No Effect
2dda7p[h]	-0.121421	-0.121421	0	No Effect
2dhp[c]	-0.0934009	-0.0934009	7.07767e-16	No Effect
2dhp[m]	-0.0934009	-0.0934009	7.07767e-16	No Effect
2dhp[n]	-0.0934009	-0.0934009	7.07767e-16	No Effect
2dr5p[c]	-0.00934009	-0.00934009	1.9082e-16	No Effect
2h34hppr[c]	-0.158782	-0.158782	0	No Effect
2h3kmtp[c]	-0.121421	-0.121421	9.99201e-16	No Effect
2h3oppan[m]	-0.0373604	-0.0467004	0.00934009	Change
2ippm[c]	-0.0934009	-0.0934009	9.02056e-16	No Effect
2kmb[c]	-0.112081	-0.112081	0	No Effect
2maacoa[m]	-0.513705	-0.513705	9.99201e-16	No Effect
2mb2coa[m]	-0.513705	-0.513705	9.99201e-16	No Effect
2mbcoa[m]	-0.541725	-0.513705	0.0280203	Change
2mbdhl[m]	0	0	0	No Effect
2me4p[h]	-0.112081	-0.112081	0	No Effect
2mecdp[h]	-0.121421	-0.121421	0	No Effect
2mhob[m]	-0.0653806	-0.0653806	3.05311e-16	No Effect
2mhop[m]	-0.0373604	-0.0373604	2.98372e-16	No Effect
2mp2coa[m]	-0.485685	-0.485685	0	No Effect
2mpdhl[m]	0.0280203	0.0280203	9.71445e-17	No Effect
2obut[h]	-0.0560405	-0.0560405	3.95517e-16	No Effect
2obut[m]	-0.0560405	-0.0560405	3.95517e-16	No Effect
2pg[c]	-0.0467004	-0.0467004	9.71445e-17	No Effect
2pg[f]	0	0	0	No Effect
2pg[h]	-0.0467004	-0.0467004	9.71445e-17	No Effect
2pg[m]	-0.0467004	-0.0467004	9.71445e-17	No Effect
2pglyc[c]	-0.0560405	-0.0420304	0.0140101	Change
2pglyc[h]	-0.0560405	-0.0420304	0.0140101	Change
2pglyc[x]	-0.0560405	-0.0420304	0.0140101	Change
34hpp[c]	-0.158782	-0.158782	0	No Effect
34hpp[h]	-0.149441	-0.149441	0	No Effect
34hpp[m]	-0.158782	-0.158782	0	No Effect
35cgmp[c]	-0.214822	-0.214822	9.99201e-16	No Effect
35cgmp[n]	-0.214822	-0.214822	9.99201e-16	No Effect
3c2hmp[c]	-0.0934009	-0.0934009	9.02056e-16	No Effect
3c3hmp[c]	-0.0934009	-0.0934009	9.02056e-16	No Effect
3c3hmp[h]	-0.0934009	-0.0934009	9.02056e-16	No Effect
3c4mop[c]	-0.0934009	-0.0934009	8.04912e-16	No Effect
3dhq[h]	-0.112081	-0.112081	0	No Effect
3dhsk[h]	-0.112081	-0.112081	0	No Effect
3dsphgn[c]	-0.261523	-0.261523	2.9976e-15	No Effect
3hbcoa[c]	-0.495025	-0.495025	9.99201e-16	No Effect
3hbcoa[m]	0	0	0	No Effect
3hbcoa[x]	-0.495025	-0.495025	0	No Effect
3hbcoa-R[c]	-0.495025	-0.495025	9.99201e-16	No Effect
3hbutACP[h]	0.102741	0.0560405	0.0467004	Change
3hcvac11eACP[h]	-0.256852	-0.172792	0.0840608	Change
3hdcoa[m]	-0.579086	-0.579086	1.9984e-15	No Effect
3hdcoa[x]	-0.579086	-0.588426	0.00934009	Change
3hddcoa[m]	-0.607106	-0.607106	2.9976e-15	No Effect
3hddcoa[x]	-0.607106	-0.616446	0.00934009	Change
3hddecACP[h]	-0.0840608	-0.130761	0.0467004	Change
3hdecACP[h]	-0.0373604	-0.0840608	0.0467004	Change
3hhcoa[m]	-0.523045	-0.523045	9.99201e-16	No Effect
3hhcoa[x]	-0.523045	-0.523045	9.99201e-16	No Effect
3hhdcoa[m]	-0.663146	-0.663146	2.9976e-15	No Effect
3hhdcoa[x]	-0.672486	-0.672486	2.9976e-15	No Effect
3hhexACP[h]	0.0560405	0.00934009	0.0467004	Change
3hib[m]	-0.0467004	-0.0467004	2.98372e-16	No Effect
3hibutcoa[m]	-0.485685	-0.485685	0	No Effect
3hivcoa[m]	-0.523045	-0.523045	0	No Effect
3hlido[c]	-0.0186802	-0.0186802	4.996e-16	No Effect
3hmbcoa[m]	-0.513705	-0.513705	9.99201e-16	No Effect
3hmoa[h]	-0.0747207	-0.0747207	4.996e-16	No Effect
3hmop[h]	-0.0934009	-0.0934009	6.10623e-16	No Effect
3hmrsACP[h]	-0.130761	-0.177462	0.0467004	Change
3hocoa[m]	-0.551065	-0.551065	9.99201e-16	No Effect
3hocoa[x]	-0.551065	-0.560405	0.00934009	Change
3hoctaACP[h]	-0.224162	-0.140101	0.0840608	Change
3hoctACP[h]	0.00934009	-0.0373604	0.0467004	Change
3hodcoa[c]	-0.709847	-0.709847	2.9976e-15	No Effect
3hpalmACP[h]	-0.177462	-0.0934009	0.0840608	Change
3hpcoa[c]	-0.485685	-0.485685	0	No Effect
3hpcoa[m]	-0.485685	-0.485685	0	No Effect
3hpp[c]	-0.0467004	-0.0467004	1.04083e-16	No Effect
3htdcoa[m]	-0.635126	-0.635126	2.9976e-15	No Effect
3htdcoa[x]	-0.644466	-0.644466	2.9976e-15	No Effect
3ig3p[h]	-0.224162	-0.224162	0	No Effect
3mb2coa[m]	-0.523045	-0.523045	0	No Effect
3mbdhl[m]	0.00934009	0.00934009	1.9082e-16	No Effect
3mgcoa[m]	-0.523045	-0.523045	0	No Effect
3mhtpp[m]	-0.0560405	-0.0560405	6.03684e-16	No Effect
3mob[c]	-0.0653806	-0.0653806	6.10623e-16	No Effect
3mob[h]	-0.0653806	-0.0653806	6.10623e-16	No Effect
3mob[m]	-0.0747207	-0.0747207	5.96745e-16	No Effect
3mop[c]	-0.102741	-0.102741	9.99201e-16	No Effect
3mop[h]	-0.0934009	-0.0934009	7.07767e-16	No Effect
3mop[m]	-0.102741	-0.102741	9.99201e-16	No Effect
3mtpa[c]	-0.112081	-0.112081	0	No Effect
3ocvac11eACP[h]	-0.247512	-0.163452	0.0840608	Change
3odcoa[m]	-0.579086	-0.579086	1.9984e-15	No Effect
3odcoa[x]	-0.579086	-0.588426	0.00934009	Change
3oddcoa[m]	-0.607106	-0.607106	2.9976e-15	No Effect
3oddcoa[x]	-0.607106	-0.616446	0.00934009	Change
3oddecACP[h]	-0.0747207	-0.121421	0.0467004	Change
3odecACP[h]	-0.0280203	-0.0747207	0.0467004	Change
3ohcoa[m]	-0.523045	-0.523045	9.99201e-16	No Effect
3ohcoa[x]	-0.523045	-0.523045	9.99201e-16	No Effect
3ohdcoa[m]	-0.663146	-0.663146	2.9976e-15	No Effect
3ohdcoa[x]	-0.672486	-0.672486	2.9976e-15	No Effect
3ohexACP[h]	0.0653806	0.0186802	0.0467004	Change
3omrsACP[h]	-0.121421	-0.168122	0.0467004	Change
3oocoa[m]	-0.551065	-0.551065	9.99201e-16	No Effect
3oocoa[x]	-0.551065	-0.560405	0.00934009	Change
3ooctACP[h]	0.0186802	-0.0280203	0.0467004	Change
3ooctdACP[h]	-0.214822	-0.130761	0.0840608	Change
3oodcoa[c]	-0.709847	-0.709847	2.9976e-15	No Effect
3opalmACP[h]	-0.168122	-0.0840608	0.0840608	Change
3opcoa[c]	-0.485685	-0.485685	0	No Effect
3otdcoa[m]	-0.635126	-0.635126	1.9984e-15	No Effect
3otdcoa[x]	-0.644466	-0.644466	2.9976e-15	No Effect
3pg[c]	-0.0467004	-0.0467004	9.71445e-17	No Effect
3pg[f]	0	0	0	No Effect
3pg[h]	-0.0560405	-0.0560405	1.04083e-16	No Effect
3pg[m]	-0.0467004	-0.0467004	9.71445e-17	No Effect
3pg[x]	-0.0467004	-0.0467004	9.71445e-17	No Effect
3php[h]	-0.0467004	-0.0373604	0.00934009	Change
3psme[h]	-0.168122	-0.168122	0	No Effect
3sala[h]	-0.0653806	-0.0467004	0.0186802	Change
3sala[m]	-0.0373604	-0.0373604	2.98372e-16	No Effect
3snpyr[h]	-0.0560405	-0.0373604	0.0186802	Change
3snpyr[m]	-0.0373604	-0.0373604	1.94289e-16	No Effect
3spyr[h]	0.00934009	0.00934009	3.98986e-17	No Effect
3spyr[m]	0	1.38778e-17	1.38778e-17	No Effect
44mctr[c]	-0.00467004	-0.00467004	8.79505e-16	No Effect
44mzym[c]	-0.00467004	-0.00467004	6.49654e-16	No Effect
4abut[c]	-0.0747207	-0.0747207	2.08167e-16	No Effect
4abut[h]	-0.0747207	-0.0747207	2.08167e-16	No Effect
4abut[m]	-0.0747207	-0.0747207	2.08167e-16	No Effect
4abutn[h]	0.168122	0.168122	0	No Effect
4abutn[m]	-0.0747207	-0.0840608	0.00934009	Change
4abz[c]	0	0	0	No Effect
4adcho[c]	-0.0373604	-0.0373604	2.01228e-16	No Effect
4c2me[h]	-0.261523	-0.261523	0	No Effect
4fumacac[c]	-0.102741	-0.102741	9.99201e-16	No Effect
4fumacac[n]	0	0	0	No Effect
4hproara[g]	-0.214822	-0.214822	9.99201e-16	No Effect
4hproaraara[g]	-0.317563	-0.317563	0	No Effect
4hproaraaraara[g]	-0.420304	-0.420304	0	No Effect
4hproaraaraaragal[g]	-0.523045	-0.523045	0	No Effect
4hproaraaragal[g]	-0.420304	-0.420304	9.99201e-16	No Effect
4hproaraaragalara[g]	-0.523045	-0.523045	0	No Effect
4hproaraaragalmeara[g]	-0.541725	-0.541725	0	No Effect
4hproaraara-LPAREN-ara-RPAREN-gal[g]	-0.523045	-0.523045	0	No Effect
4hproaraara-LPAREN-gal-RPAREN-gal[g]	-0.523045	-0.523045	9.99201e-16	No Effect
4hproaraara-LPAREN-gal-RPAREN-megal[g]	-0.541725	-0.541725	9.99201e-16	No Effect
4hproaraaramegal[g]	-0.438984	-0.438984	9.99201e-16	No Effect
4hproaragal[g]	-0.317563	-0.317563	0	No Effect
4hproara-LPAREN-aragalara-RPAREN-gal[g]	0	0	0	No Effect
4hproara-LPAREN-aragal-RPAREN-gal[g]	0	0	0	No Effect
4hproara-LPAREN-aragal-RPAREN-galara[g]	0	0	0	No Effect
4hproara-LPAREN-ara-RPAREN-gal[g]	-0.420304	-0.420304	9.99201e-16	No Effect
4hproara-LPAREN-ara-RPAREN-galara[g]	-0.523045	-0.523045	0	No Effect
4hproara-LPAREN-ara-RPAREN-galaragal[g]	-0.625786	-0.625786	9.99201e-16	No Effect
4hprogal[g]	-0.214822	-0.214822	9.99201e-16	No Effect
4hpro-LT[c]	-0.112081	-0.112081	0	No Effect
4hpro-LT[g]	-0.112081	-0.112081	0	No Effect
4izp[c]	-0.0840608	-0.0840608	4.02456e-16	No Effect
4mlacac[c]	-0.158782	-0.158782	0	No Effect
4mlacac[n]	0	0	0	No Effect
4mop[c]	-0.0934009	-0.0934009	8.04912e-16	No Effect
4mop[h]	-0.0840608	-0.0840608	9.02056e-16	No Effect
4mop[m]	-0.0934009	-0.0934009	8.04912e-16	No Effect
4mzym[c]	-0.00467004	-0.00467004	4.90059e-16	No Effect
4mzym-int1[c]	-0.00467004	-0.00467004	7.97973e-17	No Effect
4mzym-int2[c]	-0.00467004	-0.00467004	2.80158e-16	No Effect
4ogm[c]	-0.0747207	-0.0747207	1.11022e-16	No Effect
4pasp[h]	-0.0560405	-0.0560405	1.04083e-16	No Effect
4pcys[c]	-0.205482	-0.205482	1.9984e-15	No Effect
4ppan[c]	-0.149441	-0.149441	0	No Effect
4ppcys[c]	-0.214822	-0.214822	9.99201e-16	No Effect
4pyrdx[c]	0.00934009	0.00934009	5.0307e-17	No Effect
4r5au[h]	0	0.168122	0.168122	Change
56dh5flura[c]	3.33067e-16	-2.23445e-16	5.56512e-16	No Effect
56dura[c]	-0.0467004	-0.0467004	2.98372e-16	No Effect
5aizc[c]	-0.186802	-0.186802	9.99201e-16	No Effect
5aizc[h]	-0.186802	-0.186802	9.99201e-16	No Effect
5aop[h]	-0.0934009	-0.0934009	0	No Effect
5aprbu[h]	-0.00934009	0.158782	0.168122	Change
5apru[h]	-7.45931e-17	0.168122	0.168122	Change
5flura[c]	1.66533e-16	-1.40178e-16	3.06711e-16	No Effect
5flura[e]	1.66533e-16	-1.40178e-16	3.06711e-16	No Effect
5flurimp[c]	-0.102741	-0.102741	0	No Effect
5forthf[c]	-2.07116e-16	2.0055e-16	4.07666e-16	No Effect
5fthf[c]	-2.07116e-16	6.16298e-33	2.07116e-16	No Effect
5fthf[e]	-2.07116e-16	-2.84557e-17	1.7866e-16	No Effect
5fthf[m]	-2.07116e-16	0	2.07116e-16	No Effect
5hiu[m]	0	5.69113e-17	5.69113e-17	No Effect
5houdic[m]	0	5.69113e-17	5.69113e-17	No Effect
5mdr1p[c]	-0.121421	-0.121421	9.99201e-16	No Effect
5mdru1p[c]	-0.121421	-0.121421	9.99201e-16	No Effect
5mta[c]	-0.233502	-0.233502	9.99201e-16	No Effect
5mta[h]	-0.233502	-0.233502	9.99201e-16	No Effect
5mta[m]	-0.233502	-0.233502	9.99201e-16	No Effect
5mthf[m]	0	0	0	No Effect
5mtr[c]	-0.121421	-0.121421	9.99201e-16	No Effect
5prdmbz[c]	0	2.84557e-17	2.84557e-17	No Effect
6mpur[c]	0.102741	0.102741	9.99201e-16	No Effect
6mpur[e]	0.102741	0.102741	9.99201e-16	No Effect
6pgc[c]	0.0747207	0.0747207	3.05311e-16	No Effect
6pgc[h]	-0.112081	-0.112081	0	No Effect
6pgl[c]	-0.112081	-0.112081	0	No Effect
6pgl[h]	-0.112081	-0.112081	0	No Effect
6tgsnmp[c]	0	0	0	No Effect
6tins5mp[c]	1.38778e-16	-8.39668e-17	2.22745e-16	No Effect
6txan5mp[c]	0	0	0	No Effect
7dhchsterol[c]	0.00467004	0.00467004	2.2031e-16	No Effect
aacoa[c]	-0.495025	-0.495025	0	No Effect
aacoa[m]	8.53256e-32	-3.30169e-18	3.30169e-18	No Effect
aacoa[x]	-0.495025	-0.495025	0	No Effect
aact[x]	-0.0467004	-0.0467004	2.98372e-16	No Effect
ac[c]	-0.0280203	-0.0280203	1.97758e-16	No Effect
ac[e]	-0.0280203	-0.0280203	1.97758e-16	No Effect
ac[h]	-0.0280203	-0.0280203	1.97758e-16	No Effect
ac[m]	-0.0280203	-0.0280203	1.97758e-16	No Effect
ac[s]	-0.0280203	-0.0280203	1.97758e-16	No Effect
acac[c]	-0.0560405	-0.0560405	3.95517e-16	No Effect
acac[m]	-0.0560405	-0.0560405	2.98372e-16	No Effect
acac[x]	-0.0560405	-0.0560405	2.98372e-16	No Effect
acACP[h]	0.140101	0.0934009	0.0467004	Change
acald[c]	-0.0280203	-0.0280203	3.98986e-16	No Effect
acald[h]	-0.0373604	-0.0373604	2.01228e-16	No Effect
acald[m]	-0.0280203	-0.0373604	0.00934009	Change
acald[x]	-0.0280203	-0.0280203	3.98986e-16	No Effect
acaro[h]	-0.971369	-0.971369	9.99201e-16	No Effect
acaro[u]	-0.971369	-0.971369	9.99201e-16	No Effect
accoa[c]	-0.467004	-0.467004	0	No Effect
accoa[h]	-0.467004	-0.467004	0	No Effect
accoa[m]	-0.467004	-0.467004	0	No Effect
accoa[s]	-0.467004	-0.467004	0	No Effect
accoa[x]	-0.467004	-0.467004	0	No Effect
acg5p[c]	-0.112081	-0.112081	0	No Effect
acg5sa[c]	-0.112081	-0.112081	0	No Effect
acg5sa[m]	0	1.38778e-17	1.38778e-17	No Effect
acgam1p[c]	-0.140101	-0.140101	9.99201e-16	No Effect
acgam6p[c]	-0.140101	-0.140101	9.99201e-16	No Effect
acglu[c]	-0.102741	-0.102741	9.99201e-16	No Effect
achms[c]	0.0186802	0.0186802	0	No Effect
achms[h]	-0.0934009	-0.0934009	4.996e-16	No Effect
acorn[c]	-0.112081	-0.112081	0	No Effect
acorn[m]	0	0	0	No Effect
ACP[c]	-0.224162	-0.224162	0	No Effect
ACP[h]	0.0373604	0.121421	0.0840608	Change
acser[c]	-0.0560405	-0.0560405	3.95517e-16	No Effect
acser[h]	-0.0653806	-0.0653806	4.996e-16	No Effect
acser[m]	-0.0653806	-0.0560405	0.00934009	Change
actACP[h]	0.112081	0.0653806	0.0467004	Change
actp[h]	-0.0373604	-0.0373604	9.71445e-17	No Effect
actp[m]	-0.0280203	-0.0280203	1.97758e-16	No Effect
ad[c]	-0.0280203	-0.0280203	1.97758e-16	No Effect
ad[e]	-0.0280203	-0.0280203	1.97758e-16	No Effect
ade[c]	-0.112081	-0.112081	9.99201e-16	No Effect
ade[e]	-0.112081	-0.112081	9.99201e-16	No Effect
adhlam[h]	-0.0280203	-0.0280203	2.98372e-16	No Effect
adhlam[m]	0.0747207	0.0747207	4.02456e-16	No Effect
adn[c]	-0.214822	-0.214822	9.99201e-16	No Effect
adn[m]	-0.214822	-0.214822	9.99201e-16	No Effect
adp[c]	-0.214822	-0.214822	9.99201e-16	No Effect
adp[f]	0	0	0	No Effect
adp[h]	-0.224162	-0.224162	9.99201e-16	No Effect
adp[m]	-0.214822	-0.214822	9.99201e-16	No Effect
adp[n]	0	0	0	No Effect
adpglc[h]	-0.336243	-0.336243	9.99201e-16	No Effect
adprib[c]	-0.317563	-0.317563	9.99201e-16	No Effect
aflbala[c]	3.33067e-16	-3.08812e-16	6.41879e-16	No Effect
aflburppa[c]	3.33067e-16	-2.519e-16	5.84967e-16	No Effect
agm[m]	-0.0747207	-0.0840608	0.00934009	Change
agm[n]	4.75009e-34	2.84557e-17	2.84557e-17	No Effect
ahcys[c]	-0.308223	-0.308223	9.99201e-16	No Effect
ahcys[g]	-0.308223	-0.308223	9.99201e-16	No Effect
ahcys[h]	0	0	0	No Effect
ahcys[m]	-0.308223	-0.308223	9.99201e-16	No Effect
ahcys[n]	-0.308223	-0.308223	9.99201e-16	No Effect
ahdt[c]	-0.214822	-0.214822	9.99201e-16	No Effect
aicar[c]	-0.196142	-0.196142	9.99201e-16	No Effect
aicar[h]	0.149441	0.149441	9.99201e-16	No Effect
air[c]	-0.186802	-0.186802	9.99201e-16	No Effect
air[h]	-0.186802	-0.186802	9.99201e-16	No Effect
akg[c]	-0.0747207	-0.0747207	1.11022e-16	No Effect
akg[h]	-0.0747207	-0.0747207	1.11022e-16	No Effect
akg[m]	-0.0747207	-0.0747207	1.11022e-16	No Effect
ala-B[c]	-0.0467004	-0.0467004	2.98372e-16	No Effect
ala-B[h]	-0.0467004	-0.0467004	2.98372e-16	No Effect
ala-B[m]	-0.0467004	-0.0467004	2.98372e-16	No Effect
alac-S[h]	-0.0747207	-0.0747207	4.996e-16	No Effect
alac-S[m]	-0.0747207	-0.0747207	4.996e-16	No Effect
ala-L[c]	-0.0373604	-0.0373604	2.01228e-16	No Effect
ala-L[m]	-0.0373604	-0.0373604	2.01228e-16	No Effect
ala-L[x]	-0.0373604	-0.0373604	3.95517e-16	No Effect
alatrna[m]	-0.0373604	-0.0373604	3.95517e-16	No Effect
allphn[c]	-0.00934009	-0.00934009	2.30718e-16	No Effect
allphn[m]	8.56898e-18	1.42278e-16	1.33709e-16	No Effect
alltn[c]	1.77367e-33	5.69113e-17	5.69113e-17	No Effect
alltn[e]	1.77367e-33	5.69113e-17	5.69113e-17	No Effect
alltn[m]	2.47852e-33	8.5367e-17	8.5367e-17	No Effect
alltt[c]	2.47852e-33	5.69113e-17	5.69113e-17	No Effect
alltt[e]	2.47852e-33	5.69113e-17	5.69113e-17	No Effect
alltt[m]	2.47852e-33	5.69113e-17	5.69113e-17	No Effect
alpro[m]	0	0	0	No Effect
amet[c]	-0.326903	-0.326903	9.99201e-16	No Effect
amet[g]	-0.326903	-0.326903	9.99201e-16	No Effect
amet[h]	-0.0186802	-0.0186802	1.00614e-16	No Effect
amet[m]	-0.326903	-0.326903	9.99201e-16	No Effect
amet[n]	-0.326903	-0.326903	9.99201e-16	No Effect
ametam[c]	-0.326903	-0.326903	9.99201e-16	No Effect
ametam[h]	-0.326903	-0.326903	9.99201e-16	No Effect
ametam[m]	-0.326903	-0.326903	9.99201e-16	No Effect
amp[c]	-0.214822	-0.214822	9.99201e-16	No Effect
amp[h]	-0.214822	-0.214822	9.99201e-16	No Effect
amp[m]	-0.214822	-0.214822	9.99201e-16	No Effect
amp[n]	-0.214822	-0.214822	9.99201e-16	No Effect
ans[c]	-0.0467004	-0.0467004	2.98372e-16	No Effect
anth[h]	-0.121421	-0.121421	0	No Effect
anxan[u]	-0.99005	-0.99005	9.99201e-16	No Effect
ap4a[n]	0	0	0	No Effect
apoACP[c]	0	0	0	No Effect
apoACP[h]	0.261523	0.345583	0.0840608	Change
apocytc[h]	0.700507	0.700507	0	No Effect
apocytc[m]	0.700507	0.700507	0	No Effect
apofetn[h]	-5.55112e-17	-3.46447e-18	5.20467e-17	No Effect
apotfen[h]	0	0	0	No Effect
apppa[n]	-0.214822	-0.214822	9.99201e-16	No Effect
aps[c]	-0.214822	-0.214822	9.99201e-16	No Effect
aps[h]	-0.205482	-0.205482	9.99201e-16	No Effect
aps[m]	-0.214822	-0.214822	9.99201e-16	No Effect
aps[n]	-0.214822	-0.214822	9.99201e-16	No Effect
arab-L[c]	-0.102741	-0.102741	9.99201e-16	No Effect
arg-L[c]	-0.0840608	-0.0840608	9.71445e-17	No Effect
arg-L[e]	-0.0840608	-0.0840608	9.71445e-17	No Effect
arg-L[m]	-0.0840608	-0.0840608	2.08167e-16	No Effect
argsuc[c]	-0.130761	-0.130761	0	No Effect
argtrna[c]	-0.0840608	-0.0840608	9.71445e-17	No Effect
arso4[c]	0	0	0	No Effect
ascb-L[u]	0	0	0	No Effect
asnglcnacglcnacman-LPAREN-man-LPAREN-manman-RPAREN-manman-RPAREN-manmanman[c]	-1.25157	-1.25157	0	No Effect
asnglcnacglcnacman-LPAREN-man-LPAREN-manman-RPAREN-manman-RPAREN-manmanmanglc[c]	-1.35431	-1.35431	0	No Effect
asnglcnacglcnacman-LPAREN-man-LPAREN-manman-RPAREN-manman-RPAREN-manmanmanglcglc[c]	-1.45705	-1.45705	0	No Effect
asnglcnacglcnacman-LPAREN-man-LPAREN-manman-RPAREN-manman-RPAREN-manmanmanglcglcglc[c]	-1.5598	-1.5598	0	No Effect
asnglcnacglcnacman-LPAREN-man-LPAREN-manman-RPAREN-man-RPAREN-man-LPAREN-man-RPAREN-manman[c]	-1.14572	-1.14572	0	No Effect
asnglcnacglcnacman-LPAREN-man-LPAREN-manman-RPAREN-man-RPAREN-manmanman[c]	-1.04298	-1.04298	0	No Effect
asnglcnacglcnacman-LPAREN-man-LPAREN-man-RPAREN-man-RPAREN-man[c]	-0.417191	-0.417191	0	No Effect
asnglcnacglcnacman-LPAREN-man-RPAREN-man[c]	0	0	0	No Effect
asn-L[c]	-0.0560405	-0.0560405	0	No Effect
asn-L[m]	-0.0560405	-0.0560405	1.04083e-16	No Effect
asn-L[x]	-0.0560405	-0.0560405	1.04083e-16	No Effect
asntrna[m]	-0.0560405	-0.0560405	0	No Effect
Asn-X-Ser-FSLASH-Thr[c]	-0.0560405	-0.0560405	0	No Effect
asp-L[c]	-0.0467004	-0.0467004	1.94289e-16	No Effect
asp-L[h]	-0.0467004	-0.0467004	1.94289e-16	No Effect
asp-L[m]	-0.0467004	-0.0467004	1.94289e-16	No Effect
asp-L[x]	-0.0467004	-0.0467004	1.94289e-16	No Effect
aspsa[c]	-0.0560405	-0.0560405	2.01228e-16	No Effect
aspsa[h]	-0.0560405	-0.0560405	2.01228e-16	No Effect
asptrna[m]	-0.0467004	-0.0467004	1.94289e-16	No Effect
asqdca18111Z160[c]	-0.966699	-0.966699	1.19904e-14	No Effect
asqdca1819Z160[c]	-0.934009	-0.934009	1.19904e-14	No Effect
asqdca1829Z12Z160[c]	-0.934009	-0.934009	1.19904e-14	No Effect
asqdca1839Z12Z15Z160[c]	-0.934009	-0.934009	1.19904e-14	No Effect
asqdpa18111Z160[c]	-0.966699	-0.966699	1.19904e-14	No Effect
asqdpa1819Z160[c]	-0.934009	-0.934009	1.19904e-14	No Effect
asqdpa1829Z12Z160[c]	-0.934009	-0.934009	1.19904e-14	No Effect
asqdpa1839Z12Z15Z160[c]	-0.934009	-0.934009	1.19904e-14	No Effect
atp[c]	-0.224162	-0.224162	9.99201e-16	No Effect
atp[f]	0.0373604	0.0373604	2.01228e-16	No Effect
atp[h]	-0.233502	-0.233502	1.9984e-15	No Effect
atp[m]	-0.214822	-0.214822	9.99201e-16	No Effect
atp[n]	-0.214822	-0.214822	9.99201e-16	No Effect
avite1[h]	0	0	0	No Effect
b2coa[c]	-0.495025	-0.495025	9.99201e-16	No Effect
b2coa[m]	0	0	0	No Effect
b2coa[x]	-0.495025	-0.495025	0	No Effect
bamppald[h]	-0.0560405	-0.0560405	3.95517e-16	No Effect
B-ara1p[c]	-0.102741	-0.102741	9.99201e-16	No Effect
bathorhodopsin[s]	-0.485685	-0.485685	9.99201e-16	No Effect
bcrptxan[u]	-0.980709	-0.980709	1.9984e-15	No Effect
bhb[m]	-0.0560405	-0.0560405	4.02456e-16	No Effect
bhb[x]	-0.0560405	-0.0560405	4.996e-16	No Effect
bilirub[h]	-0.737867	-0.737867	0	No Effect
biliverd[h]	-0.728527	-0.728527	0	No Effect
btal[c]	-0.0560405	-0.0560405	1.29757e-15	No Effect
btal[h]	0.429644	0.429644	0	No Effect
btcoa[c]	-0.495025	-0.495025	9.99201e-16	No Effect
btcoa[h]	0	0	0	No Effect
btcoa[m]	-0.495025	-0.495025	9.99201e-16	No Effect
btcoa[x]	-0.495025	-0.495025	0	No Effect
btnCCP[h]	0	0	0	No Effect
but[c]	-0.0560405	-0.0560405	9.99201e-16	No Effect
but2eACP[h]	0.102741	0.0560405	0.0467004	Change
butACP[h]	0.0934009	0.0467004	0.0467004	Change
bvite[h]	-0.691167	-0.691167	9.99201e-16	No Effect
ca[c]	-0.270863	-0.270863	4.996e-15	No Effect
cacoa[c]	-0.709847	-0.709847	3.9968e-15	No Effect
cala[c]	-0.0467004	-0.0467004	2.98372e-16	No Effect
camp[c]	-0.214822	-0.214822	9.99201e-16	No Effect
camp[n]	-0.214822	-0.214822	9.99201e-16	No Effect
carn[h]	-0.177462	-0.177462	9.99201e-16	No Effect
caro[h]	-0.971369	-0.971369	9.99201e-16	No Effect
caro[u]	-0.971369	-0.971369	9.99201e-16	No Effect
cat[c]	0	0	0	No Effect
cbasp[c]	-0.0467004	-0.0467004	9.71445e-17	No Effect
cbasp[m]	-0.0467004	-0.0467004	9.71445e-17	No Effect
cbmp[m]	-0.0747207	-0.0840608	0.00934009	Change
cbmp[n]	0	0	0	No Effect
cbp[c]	1.97064e-17	1.224e-16	1.02694e-16	No Effect
cbp[h]	-0.00934009	-0.00934009	1.59595e-16	No Effect
cbp[m]	6.83698e-18	1.10942e-16	1.04105e-16	No Effect
cbtnCCP[h]	7.35043e-18	-2.68983e-17	3.42488e-17	No Effect
cdp[c]	-0.158782	-0.158782	0	No Effect
cdp[m]	0	0	0	No Effect
cdp12dgr18111Z160[c]	-0.733197	-0.733197	7.99361e-15	No Effect
cdp12dgr18111Z160[h]	-0.751877	-0.751877	6.99441e-15	No Effect
cdp12dgr1819Z160[c]	-0.700507	-0.700507	6.99441e-15	No Effect
cdp12dgr1819Z160[h]	-0.719187	-0.719187	5.9952e-15	No Effect
cdpea[c]	-0.205482	-0.205482	0	No Effect
chla[h]	-1.27959	-1.27959	0	No Effect
chla[u]	-1.27959	-1.27959	0	No Effect
chlaemr[u]	-1.27959	-1.27959	0	No Effect
chlb[u]	-1.27959	-1.27959	0	No Effect
chlda[h]	-0.765887	-0.765887	0	No Effect
chlda[u]	-0.765887	-0.765887	0	No Effect
chldb[h]	-0.765887	-0.765887	9.99201e-16	No Effect
chldb[u]	-0.765887	-0.765887	0	No Effect
chlstol[c]	0.00467004	0.00467004	3.40006e-16	No Effect
chor[c]	-0.0280203	-0.0280203	3.98986e-16	No Effect
chor[h]	-0.158782	-0.158782	9.99201e-16	No Effect
chsterol[c]	0.00467004	0.00467004	5.9848e-17	No Effect
cit[c]	-0.0747207	-0.0747207	3.05311e-16	No Effect
cit[m]	-0.0747207	-0.0747207	2.08167e-16	No Effect
cit[x]	-0.0747207	-0.0747207	3.05311e-16	No Effect
cital[c]	-0.00934009	-0.00934009	9.88792e-17	No Effect
cital[e]	-0.00934009	-0.00934009	9.88792e-17	No Effect
citalald[c]	0.0280203	0.0280203	1.00614e-16	No Effect
citalo[c]	0	0	0	No Effect
citalppa[c]	0.0280203	0.0280203	1.00614e-16	No Effect
citr-L[c]	-0.0840608	-0.0840608	2.08167e-16	No Effect
citr-L[h]	-0.0840608	-0.0840608	4.02456e-16	No Effect
citr-L[m]	-0.0840608	-0.0840608	2.08167e-16	No Effect
cmp[c]	-0.149441	-0.149441	0	No Effect
cmp[h]	-0.149441	-0.149441	0	No Effect
co[c]	0	-5.55112e-17	5.55112e-17	No Effect
co[h]	0	0	0	No Effect
co2[c]	0	0	0	No Effect
co2[e]	0	0	0	No Effect
co2[h]	0	3.83499e-29	3.83499e-29	No Effect
co2[m]	0	1.0656e-30	1.0656e-30	No Effect
co2[x]	0	0	0	No Effect
coa[c]	-0.438984	-0.438984	0	No Effect
coa[h]	-0.438984	-0.438984	0	No Effect
coa[m]	-0.438984	-0.438984	0	No Effect
coa[s]	-0.438984	-0.438984	0	No Effect
coa[x]	-0.438984	-0.438984	0	No Effect
cpp1[h]	-0.737867	-0.737867	0	No Effect
cpp3[h]	-0.691167	-0.691167	9.99201e-16	No Effect
cpppg1[h]	-0.747207	-0.747207	0	No Effect
cpppg3[h]	-0.747207	-0.747207	0	No Effect
crpxan[u]	-0.980709	-0.980709	1.9984e-15	No Effect
csn[c]	-0.0467004	-0.0560405	0.00934009	Change
ctp[c]	-0.168122	-0.168122	0	No Effect
ctp[h]	-0.168122	-0.168122	0	No Effect
ctp[m]	0	0	0	No Effect
cyart[c]	-0.0140101	-0.0140101	1.39992e-15	No Effect
cyeuol[c]	-0.0233502	-0.0233502	9.99201e-16	No Effect
cys-L[c]	-0.0653806	-0.0653806	1.94289e-16	No Effect
cys-L[h]	-0.0653806	-0.0653806	1.94289e-16	No Effect
cys-L[m]	0	0	0	No Effect
cyst-L[h]	-0.130761	-0.130761	0	No Effect
cystrna[c]	-0.0653806	-0.0653806	1.94289e-16	No Effect
cytc[h]	0	0	0	No Effect
cytc[m]	0	0	0	No Effect
cytd[c]	-0.149441	-0.149441	0	No Effect
cytP450o[c]	-1.66533e-16	1.11722e-16	2.78256e-16	No Effect
cytP450o[h]	0	0	0	No Effect
cytP450r[c]	0	0	0	No Effect
cytP450r[h]	-0.00934009	-0.00934009	0	No Effect
dad-2[c]	-0.205482	-0.205482	9.99201e-16	No Effect
dadp[c]	-0.214822	-0.214822	9.99201e-16	No Effect
dadp[h]	-0.00934009	-0.00934009	1.89085e-16	No Effect
dadp[m]	0	0	0	No Effect
damp[c]	-0.205482	-0.205482	9.99201e-16	No Effect
damp[h]	0	0	0	No Effect
damp[m]	0	0	0	No Effect
datp[c]	-0.214822	-0.214822	9.99201e-16	No Effect
datp[m]	-3.15682e-17	0	3.15682e-17	No Effect
db4p[h]	-0.0934009	-0.0934009	9.71445e-17	No Effect
dc2coa[m]	-0.579086	-0.579086	1.9984e-15	No Effect
dc2coa[x]	-0.579086	-0.588426	0.00934009	Change
dca[h]	-0.0840608	-0.214822	0.130761	Change
dcaACP[h]	-0.0467004	-0.0934009	0.0467004	Change
dcacoa[m]	-0.579086	-0.579086	1.9984e-15	No Effect
dcacoa[x]	-0.579086	-0.588426	0.00934009	Change
dcamp[c]	-0.261523	-0.261523	9.99201e-16	No Effect
dcamp[h]	-0.280203	-0.112081	0.168122	Change
dcaro[h]	-0.971369	-0.971369	9.99201e-16	No Effect
dcdp[c]	-0.158782	-0.158782	0	No Effect
dcdp[m]	0	0	0	No Effect
dcmp[c]	-0.149441	-0.149441	0	No Effect
dctp[c]	-0.158782	-0.158782	0	No Effect
dctp[m]	-3.30194e-18	-7.30804e-31	3.30194e-18	No Effect
dcyt[c]	-0.149441	-0.149441	0	No Effect
dd2coa[m]	-0.607106	-0.607106	2.9976e-15	No Effect
dd2coa[x]	-0.607106	-0.616446	0.00934009	Change
ddca[h]	-0.130761	-0.261523	0.130761	Change
ddcaACP[h]	-0.0934009	-0.140101	0.0467004	Change
ddcacoa[m]	-0.607106	-0.607106	2.9976e-15	No Effect
ddcacoa[x]	-0.616446	-0.616446	1.9984e-15	No Effect
ddmcital[c]	0.00934009	0.00934009	9.88792e-17	No Effect
ddsmsterol[c]	0.00467004	0.00467004	3.99854e-16	No Effect
dedoldp[c]	-1.42903	-1.42903	0	No Effect
degly[e]	0	0	0	No Effect
dgdg1819Z160[h]	-0.765887	-0.765887	7.99361e-15	No Effect
dgdg1819Z1617Z[h]	-0.798578	-0.798578	6.99441e-15	No Effect
dgdg1819Z1619Z[h]	-0.798578	-0.798578	6.99441e-15	No Effect
dgdg1819Z1627Z10Z[h]	-0.831268	-0.831268	6.99441e-15	No Effect
dgdg1819Z1634Z7Z10Z[h]	-0.863958	-0.863958	7.99361e-15	No Effect
dgdg1819Z1637Z10Z13Z[h]	-0.863958	-0.863958	7.99361e-15	No Effect
dgdg1829Z12Z160[h]	-0.798578	-0.798578	6.99441e-15	No Effect
dgdg1829Z12Z1617Z[h]	-0.831268	-0.831268	6.99441e-15	No Effect
dgdg1829Z12Z1619Z[h]	-0.831268	-0.831268	6.99441e-15	No Effect
dgdg1829Z12Z1627Z10Z[h]	-0.863958	-0.863958	7.99361e-15	No Effect
dgdg1829Z12Z1634Z7Z10Z[h]	-0.896649	-0.896649	7.99361e-15	No Effect
dgdg1829Z12Z1637Z10Z13Z[h]	-0.896649	-0.896649	7.99361e-15	No Effect
dgdg1839Z12Z15Z160[h]	-0.831268	-0.831268	7.99361e-15	No Effect
dgdg1839Z12Z15Z1627Z10Z[h]	-0.896649	-0.896649	7.99361e-15	No Effect
dgdg1839Z12Z15Z1634Z7Z10Z[h]	-0.929339	-0.929339	6.99441e-15	No Effect
dgdg1839Z12Z15Z1637Z10Z13Z[h]	-0.929339	-0.929339	6.99441e-15	No Effect
dgdg1839Z12Z15Z1644Z7Z10Z13Z[h]	-0.962029	-0.962029	7.99361e-15	No Effect
dgdp[c]	-0.224162	-0.224162	9.99201e-16	No Effect
dgdp[m]	0	0	0	No Effect
dghs16018111Z[c]	-0.667816	-0.667816	6.99441e-15	No Effect
dghs1601819Z[c]	-0.635126	-0.635126	6.99441e-15	No Effect
dghs18111Z18111Z[c]	-0.747207	-0.747207	7.99361e-15	No Effect
dghs18111Z1819Z[c]	-0.714517	-0.714517	7.99361e-15	No Effect
dghs1819Z18111Z[c]	-0.714517	-0.714517	7.99361e-15	No Effect
dghs1819Z1819Z[c]	-0.681827	-0.681827	7.99361e-15	No Effect
dgmp[c]	-0.214822	-0.214822	9.99201e-16	No Effect
dgsn[c]	-0.214822	-0.214822	9.99201e-16	No Effect
dgtp[c]	-0.224162	-0.224162	9.99201e-16	No Effect
dgtp[m]	3.06714e-17	-3.75606e-17	6.8232e-17	No Effect
dgts16018111Z[c]	-0.723857	-0.723857	7.99361e-15	No Effect
dgts1601819Z[c]	-0.691167	-0.691167	7.99361e-15	No Effect
dgts1601829Z12Z[c]	-0.691167	-0.691167	7.99361e-15	No Effect
dgts1601835Z9Z12Z[c]	-0.691167	-0.691167	8.99281e-15	No Effect
dgts1601845Z9Z12Z15Z[c]	-0.691167	-0.691167	8.99281e-15	No Effect
dgts18111Z18111Z[c]	-0.803248	-0.803248	7.99361e-15	No Effect
dgts18111Z1819Z[c]	-0.770557	-0.770557	7.99361e-15	No Effect
dgts18111Z1829Z12Z[c]	-0.770557	-0.770557	7.99361e-15	No Effect
dgts18111Z1835Z9Z12Z[c]	-0.770557	-0.770557	7.99361e-15	No Effect
dgts18111Z1845Z9Z12Z15Z[c]	-0.770557	-0.770557	7.99361e-15	No Effect
dgts1819Z18111Z[c]	-0.770557	-0.770557	7.99361e-15	No Effect
dgts1819Z1819Z[c]	-0.737867	-0.737867	7.99361e-15	No Effect
dgts1819Z1829Z12Z[c]	-0.737867	-0.737867	7.99361e-15	No Effect
dgts1819Z1835Z9Z12Z[c]	-0.737867	-0.737867	7.99361e-15	No Effect
dgts1819Z1845Z9Z12Z15Z[c]	-0.737867	-0.737867	7.99361e-15	No Effect
dgts1829Z12Z18111Z[c]	-0.770557	-0.770557	7.99361e-15	No Effect
dgts1829Z12Z1819Z[c]	-0.737867	-0.737867	7.99361e-15	No Effect
dgts1829Z12Z1829Z12Z[c]	-0.737867	-0.737867	7.99361e-15	No Effect
dgts1829Z12Z1835Z9Z12Z[c]	-0.737867	-0.737867	8.99281e-15	No Effect
dgts1829Z12Z1845Z9Z12Z15Z[c]	-0.737867	-0.737867	7.99361e-15	No Effect
dgts1839Z12Z15Z18111Z[c]	-0.770557	-0.770557	7.99361e-15	No Effect
dgts1839Z12Z15Z1819Z[c]	-0.737867	-0.737867	7.99361e-15	No Effect
dgts1839Z12Z15Z1835Z9Z12Z[c]	-0.737867	-0.737867	8.99281e-15	No Effect
dgts1839Z12Z15Z1845Z9Z12Z15Z[c]	-0.737867	-0.737867	8.99281e-15	No Effect
dhap[c]	-0.0560405	-0.0560405	1.04083e-16	No Effect
dhap[f]	-0.149441	-0.149441	0	No Effect
dhap[h]	-0.0653806	-0.0653806	9.71445e-17	No Effect
dhap[m]	0.0467004	0.0467004	1.94289e-16	No Effect
dhdascb[u]	0	1.30153e-17	1.30153e-17	No Effect
dhf[c]	0.0186802	0.0186802	2.98372e-16	No Effect
dhlam[h]	0	0	0	No Effect
dhlam[m]	0.102741	0.102741	9.99201e-16	No Effect
dhlpro[m]	0.0186802	0.0186802	9.71445e-17	No Effect
dhnpt[c]	0	0	0	No Effect
dhor-S[c]	-0.0467004	-0.0467004	9.71445e-17	No Effect
dhor-S[m]	-0.0467004	-0.0467004	9.71445e-17	No Effect
dhpmp[c]	-0.205482	-0.205482	1.9984e-15	No Effect
dhpt[c]	0.102741	0.102741	9.99201e-16	No Effect
dhretinol[s]	-0.504365	-0.504365	9.99201e-16	No Effect
din[c]	-0.205482	-0.205482	0	No Effect
dkmpp[c]	-0.121421	-0.121421	9.99201e-16	No Effect
dma[c]	0	0	0	No Effect
dmbzid[c]	-0.0280203	-0.0280203	4.996e-16	No Effect
dmcital[c]	0	0	0	No Effect
dmlz[h]	7.86433e-34	0.0840608	0.0840608	Change
dmpp[c]	-0.140101	-0.140101	9.99201e-16	No Effect
dmpp[h]	-0.140101	-0.140101	0	No Effect
dmpq[h]	-0.691167	-0.691167	9.99201e-16	No Effect
dna5mtc[n]	-0.0186802	-0.0186802	1.00614e-16	No Effect
dnac[n]	0	0	0	No Effect
dnad[c]	-0.214822	-0.214822	9.99201e-16	No Effect
dnad[h]	-0.205482	-0.205482	9.99201e-16	No Effect
dnad[n]	-0.214822	-0.214822	9.99201e-16	No Effect
doldp[c]	-1.42903	-1.42903	0	No Effect
doldpglcnac[c]	-1.56914	-1.56914	0	No Effect
doldpglcnacglcnac[c]	-1.6999	-1.6999	0	No Effect
doldpglcnacglcnacman[c]	-1.80264	-1.80264	0	No Effect
doldpglcnacglcnacman-LPAREN-man-LPAREN-manman-RPAREN-manman-RPAREN-manmanman[c]	-2.62457	-2.62457	0	No Effect
doldpglcnacglcnacman-LPAREN-man-LPAREN-manman-RPAREN-manman-RPAREN-manmanmanglc[c]	-2.72731	-2.72731	1.02141e-14	No Effect
doldpglcnacglcnacman-LPAREN-man-LPAREN-manman-RPAREN-manman-RPAREN-manmanmanglcglc[c]	-2.83005	-2.83005	0	No Effect
doldpglcnacglcnacman-LPAREN-man-LPAREN-manman-RPAREN-manman-RPAREN-manmanmanglcglcglc[c]	-2.93279	-2.93279	0	No Effect
doldpglcnacglcnacman-LPAREN-man-LPAREN-man-RPAREN-manman-RPAREN-manmanman[c]	-2.52182	-2.52182	0	No Effect
doldpglcnacglcnacman-LPAREN-manmanman-RPAREN-manmanman[c]	-2.41908	-2.41908	1.02141e-14	No Effect
doldpglcnacglcnacman-LPAREN-manman-RPAREN-manmanman[c]	-2.31634	-2.31634	0	No Effect
doldpglcnacglcnacman-LPAREN-man-RPAREN-man[c]	-2.00812	-2.00812	0	No Effect
doldpglcnacglcnacman-LPAREN-man-RPAREN-manman[c]	-2.11086	-2.11086	0	No Effect
doldpglcnacglcnacman-LPAREN-man-RPAREN-manmanman[c]	-2.2136	-2.2136	0	No Effect
doldpglcnacglcnacmanman[c]	-1.90538	-1.90538	0	No Effect
dolmanp[c]	-1.53177	-1.53177	0	No Effect
dolp[c]	-1.42903	-1.42903	0	No Effect
dolpglc[c]	-1.53177	-1.53177	9.99201e-15	No Effect
dpcoa[c]	-0.429644	-0.429644	0	No Effect
drib[c]	0	0	0	No Effect
dscl[h]	-0.784568	-0.784568	0	No Effect
dsmsterol[c]	0.00467004	0.00467004	3.40006e-16	No Effect
dtdp[c]	-0.177462	-0.177462	9.99201e-16	No Effect
dtdp[m]	0	0	0	No Effect
dtmp[c]	-0.168122	-0.168122	0	No Effect
dttp[c]	-0.177462	-0.177462	0	No Effect
dttp[m]	-8.79025e-18	0	8.79025e-18	No Effect
dudp[c]	-0.149441	-0.149441	0	No Effect
dudp[m]	0	0	0	No Effect
dump[c]	-0.149441	-0.149441	0	No Effect
duri[c]	-0.149441	-0.149441	0	No Effect
dutp[c]	-0.158782	-0.158782	9.99201e-16	No Effect
dutp[m]	0	0	0	No Effect
dvchlda[h]	-0.756547	-0.756547	0	No Effect
dvite[h]	-0.672486	-0.672486	9.99201e-16	No Effect
dvpchlda[h]	-0.747207	-0.747207	9.99201e-16	No Effect
dxyl5p[h]	-0.102741	-0.102741	9.99201e-16	No Effect
e4p[h]	-0.0840608	-0.0840608	1.11022e-16	No Effect
ecaro[h]	-0.971369	-0.971369	9.99201e-16	No Effect
echn[u]	-0.980709	-0.980709	1.9984e-15	No Effect
egly[e]	0	0	0	No Effect
eig3p[c]	-0.130761	-0.130761	0	No Effect
eig3p[h]	-0.149441	-0.149441	9.99201e-16	No Effect
epm[h]	-0.311336	-0.311336	0	No Effect
etfox[m]	0	5.68794e-18	5.68794e-18	No Effect
etfrd[m]	0	0	0	No Effect
etha[c]	-0.0373604	-0.0373604	2.01228e-16	No Effect
ethamp[c]	-0.0467004	-0.0467004	9.71445e-17	No Effect
etoh[c]	-0.0280203	-0.0280203	2.98372e-16	No Effect
etoh[e]	0	0	0	No Effect
etoh[h]	-0.0280203	-0.0280203	2.98372e-16	No Effect
etoh[m]	-0.0280203	-0.0280203	2.98372e-16	No Effect
etoh[x]	-0.0280203	-0.0280203	2.98372e-16	No Effect
f1p[h]	-0.217935	-0.217935	0	No Effect
f26bp[c]	-0.112081	-0.112081	0	No Effect
f2p[h]	-0.217935	-0.217935	9.99201e-16	No Effect
f6p-B[c]	-0.112081	-0.112081	0	No Effect
f6p-B[h]	-0.121421	-0.121421	0	No Effect
fad[c]	-0.214822	-0.214822	9.99201e-16	No Effect
fad[h]	-0.214822	-0.214822	9.99201e-16	No Effect
fad[m]	-0.214822	-0.214822	9.99201e-16	No Effect
fad[x]	-0.214822	-0.214822	9.99201e-16	No Effect
fadh2[c]	-0.214822	-0.214822	9.99201e-16	No Effect
fadh2[h]	-0.214822	-0.214822	9.99201e-16	No Effect
fadh2[m]	-0.214822	-0.214822	9.99201e-16	No Effect
fadh2[x]	-0.214822	-0.214822	9.99201e-16	No Effect
fald[c]	-0.0280203	-0.0280203	1.00614e-16	No Effect
fdp-B[c]	-0.112081	-0.112081	0	No Effect
fdp-B[f]	-0.112081	-0.112081	0	No Effect
fdp-B[h]	-0.130761	-0.130761	0	No Effect
fdp-B[m]	0	0	0	No Effect
fdxox[c]	0	0	0	No Effect
fdxox[h]	0	0	0	No Effect
fdxox[m]	0	0	0	No Effect
fdxox[u]	0	0	0	No Effect
fdxrd[c]	-0.00467004	-0.00467004	9.54098e-18	No Effect
fdxrd[h]	-0.00467004	-0.00467004	2.94903e-17	No Effect
fdxrd[m]	-0.00467004	-0.00467004	0	No Effect
fdxrd[u]	-0.00934009	-0.00934009	1.04083e-17	No Effect
fe2[c]	5.55112e-17	-2.77556e-17	8.32667e-17	No Effect
fe2[e]	0	0	0	No Effect
fe2[h]	5.55112e-17	0	5.55112e-17	No Effect
fe3[c]	0	0	0	No Effect
fe3[e]	0	0	0	No Effect
fe3[h]	5.55112e-17	3.46447e-18	5.20467e-17	No Effect
fgam[c]	-0.158782	-0.158782	9.99201e-16	No Effect
fgam[h]	-0.186802	-0.186802	9.99201e-16	No Effect
fgam[m]	-0.0186802	-0.0186802	1.97758e-16	No Effect
ficytb5[c]	0	0	0	No Effect
ficytc[h]	0	0	0	No Effect
ficytc[m]	0	0	0	No Effect
ficytc[x]	-0.0326903	-0.0256852	0.00700507	Change
fmettrna[c]	-0.130761	-0.130761	0	No Effect
fmn[c]	0	0	0	No Effect
focytb5[c]	0	0	0	No Effect
focytc[h]	0	0	0	No Effect
focytc[m]	6.37333e-34	2.56117e-17	2.56117e-17	No Effect
focytc[x]	0	0	0	No Effect
fol[c]	0	0	0	No Effect
for[c]	-0.00934009	-0.00934009	6.93889e-17	No Effect
for[e]	0	0	0	No Effect
for[h]	-0.00934009	-0.00934009	9.88792e-17	No Effect
for[m]	-0.00934009	-0.00934009	6.93889e-17	No Effect
for[x]	-0.00934009	-0.00934009	1.70003e-16	No Effect
fpram[c]	-0.177462	-0.177462	9.99201e-16	No Effect
fpram[h]	-0.186802	-0.186802	9.99201e-16	No Effect
fprica[c]	-0.214822	-0.214822	9.99201e-16	No Effect
frdp[c]	-0.382944	-0.382944	0	No Effect
frdp[h]	-0.382944	-0.382944	0	No Effect
frdp[m]	-0.382944	-0.382944	0	No Effect
frmd[c]	-0.00934009	-0.00934009	6.93889e-17	No Effect
frmd[x]	-0.00934009	-0.00934009	1.40513e-16	No Effect
fru-B[c]	-0.102741	-0.102741	9.99201e-16	No Effect
fru-B[h]	-0.208595	-0.208595	0	No Effect
fum[c]	-0.0467004	-0.0467004	1.94289e-16	No Effect
fum[h]	0	0	0	No Effect
fum[m]	-0.0467004	-0.0467004	1.94289e-16	No Effect
g1p[c]	-0.112081	-0.112081	0	No Effect
g1p[h]	-0.121421	-0.121421	0	No Effect
g3p[c]	-0.0560405	-0.0560405	1.04083e-16	No Effect
g3p[f]	0.0373604	0.0373604	0	No Effect
g3p[h]	-0.0653806	-0.0653806	9.71445e-17	No Effect
g3p[m]	-0.0467004	-0.0467004	1.94289e-16	No Effect
g3pe[c]	-0.0840608	-0.0840608	8.04912e-16	No Effect
g6p-A[c]	-0.112081	-0.112081	0	No Effect
g6p-A[h]	-0.121421	-0.121421	0	No Effect
g6p-A[n]	0.112081	0.112081	0	No Effect
g6p-B[c]	-0.112081	-0.112081	0	No Effect
g6p-B[h]	-0.121421	-0.121421	0	No Effect
gal[c]	-0.102741	-0.102741	9.99201e-16	No Effect
gal[h]	-0.102741	-0.102741	9.99201e-16	No Effect
gal[n]	-1.82049e-33	7.22974e-17	7.22974e-17	No Effect
gal1p[c]	-0.112081	-0.112081	0	No Effect
gal1p[h]	-0.112081	-0.112081	0	No Effect
galctn-D[n]	0	0	0	No Effect
gam6p[c]	-0.112081	-0.112081	0	No Effect
gar[c]	-0.140101	-0.140101	9.99201e-16	No Effect
gar[h]	-0.121421	-0.121421	0	No Effect
gar[m]	0	0	0	No Effect
gcald[c]	0	0	0	No Effect
gcaro[h]	-0.971369	-0.971369	1.9984e-15	No Effect
gcaro[u]	-0.971369	-0.971369	9.99201e-16	No Effect
gdp[c]	-0.224162	-0.224162	1.9984e-15	No Effect
gdp[h]	0	0	0	No Effect
gdp[m]	0	0	0	No Effect
gdpmann[c]	-0.326903	-0.326903	9.99201e-16	No Effect
gdptp[c]	-0.233502	-0.233502	1.9984e-15	No Effect
ggchlda[u]	-1.25157	-1.25157	0	No Effect
ggchldb[u]	-1.25157	-1.25157	0	No Effect
ggdp[h]	-0.504365	-0.504365	0	No Effect
ggdp[u]	-0.504365	-0.504365	0	No Effect
ggl[h]	-0.140101	-0.140101	9.99201e-16	No Effect
glc-A[c]	-0.102741	-0.102741	9.99201e-16	No Effect
glc-A[h]	-0.208595	-0.208595	0	No Effect
glc-B[c]	-0.102741	-0.102741	9.99201e-16	No Effect
glc-B[h]	-0.112081	-0.112081	0	No Effect
glcn[h]	-0.102741	-0.102741	9.99201e-16	No Effect
glcur[c]	0	0	0	No Effect
gln-L[c]	-0.0840608	-0.0840608	9.71445e-17	No Effect
gln-L[e]	-0.0840608	-0.0840608	9.71445e-17	No Effect
gln-L[h]	-0.0840608	-0.0840608	0	No Effect
gln-L[m]	-0.0747207	-0.0747207	1.11022e-16	No Effect
glntrna[c]	-0.0840608	-0.0840608	0	No Effect
glu1sa[h]	-0.0934009	-0.0934009	0	No Effect
glu5p[c]	-0.0840608	-0.0840608	0	No Effect
glu5p[m]	-0.0840608	-0.0840608	3.05311e-16	No Effect
glu5p[x]	-1.35345e-17	8.32667e-17	9.68012e-17	No Effect
glu5sa[c]	-0.0840608	-0.0840608	1.94289e-16	No Effect
glu5sa[m]	-0.0840608	-0.0840608	3.05311e-16	No Effect
glu5sa[x]	0	0	0	No Effect
glucys[h]	-0.149441	-0.149441	0	No Effect
glu-L[c]	-0.0747207	-0.0747207	1.11022e-16	No Effect
glu-L[h]	-0.0840608	-0.0840608	0	No Effect
glu-L[m]	-0.0747207	-0.0747207	1.11022e-16	No Effect
glutrna[c]	-0.0747207	-0.0747207	1.11022e-16	No Effect
glutrna[h]	0	0	0	No Effect
glx[c]	-0.0467004	-0.0326903	0.0140101	Change
glx[h]	-0.0186802	-0.0186802	9.71445e-17	No Effect
glx[m]	-0.0186802	-0.0280203	0.00934009	Change
glx[x]	-0.0467004	-0.0326903	0.0140101	Change
gly[c]	-0.0186802	-0.0186802	9.71445e-17	No Effect
gly[h]	-0.0186802	-0.0186802	9.71445e-17	No Effect
gly[m]	-0.0186802	-0.0186802	9.71445e-17	No Effect
gly[x]	-0.0186802	-0.0186802	9.71445e-17	No Effect
glyald[c]	-0.0373604	-0.0373604	6.03684e-16	No Effect
glyald[h]	-0.152555	-0.152555	0	No Effect
glyc[c]	-0.0373604	-0.0373604	7.97973e-16	No Effect
glyc[h]	-0.0373604	-0.0373604	7.97973e-16	No Effect
glyc3p[c]	-0.0467004	-0.0467004	5.96745e-16	No Effect
glyc3p[h]	-0.0747207	-0.0747207	9.71445e-17	No Effect
glyclt[c]	-0.0467004	-0.0326903	0.0140101	Change
glyclt[e]	-0.0467004	-0.0326903	0.0140101	Change
glyclt[h]	-0.0467004	-0.0326903	0.0140101	Change
glyclt[m]	-0.0467004	-0.0326903	0.0140101	Change
glyclt[x]	-0.0467004	-0.0326903	0.0140101	Change
glyc-R[c]	-0.0373604	-0.0373604	3.95517e-16	No Effect
glyc-R[h]	-0.0467004	-0.0467004	0	No Effect
glyc-R[m]	-0.0373604	-0.0467004	0.00934009	Change
glytrna[c]	-0.0186802	-0.0186802	0	No Effect
glytrna[m]	-0.0186802	-0.0186802	1.97758e-16	No Effect
gmp[c]	-0.214822	-0.214822	9.99201e-16	No Effect
gmp[m]	-0.214822	-0.214822	9.99201e-16	No Effect
gmp[n]	-0.214822	-0.214822	9.99201e-16	No Effect
grdp[c]	-0.261523	-0.261523	0	No Effect
grdp[h]	-0.261523	-0.261523	0	No Effect
gsn[c]	-0.205482	-0.205482	9.99201e-16	No Effect
gthox[c]	0	0	0	No Effect
gthox[h]	-0.326903	-0.326903	9.99201e-16	No Effect
gthox[m]	0	0	0	No Effect
gthox[u]	-0.326903	-0.326903	9.99201e-16	No Effect
gthrd[c]	4.66331e-17	-3.61487e-17	8.27819e-17	No Effect
gthrd[h]	-0.168122	-0.168122	0	No Effect
gthrd[m]	0	1.65085e-18	1.65085e-18	No Effect
gthrd[u]	-0.168122	-0.168122	0	No Effect
gtp[c]	-0.224162	-0.224162	1.9984e-15	No Effect
gtp[h]	-0.0280203	0.140101	0.168122	Change
gtp[m]	-5.01035e-18	-1.64113e-16	1.59103e-16	No Effect
gtp[n]	-0.214822	-0.214822	9.99201e-16	No Effect
gua[c]	-0.112081	-0.112081	9.99201e-16	No Effect
gua[e]	-0.112081	-0.112081	9.99201e-16	No Effect
h[c]	-8.44548e-34	-2.84557e-17	2.84557e-17	No Effect
h[e]	0	0	0	No Effect
h[f]	-8.44548e-34	0	8.44548e-34	No Effect
h[g]	-8.44548e-34	-2.84557e-17	2.84557e-17	No Effect
h[h]	-1.41554e-33	-3.04319e-18	3.04319e-18	No Effect
h[m]	-7.74702e-34	-2.84557e-17	2.84557e-17	No Effect
h[n]	0	0	0	No Effect
h[s]	-1.64429e-33	-3.04319e-18	3.04319e-18	No Effect
h[u]	1.00164e-17	-1.10032e-17	2.10196e-17	No Effect
h[x]	-6.97323e-17	-7.91402e-30	6.97323e-17	No Effect
h2[c]	-0.00934009	-0.00934009	6.93889e-17	No Effect
h2[e]	0	0	0	No Effect
h2[h]	-0.00934009	-0.00934009	6.93889e-17	No Effect
h2[m]	-0.00934009	-0.00934009	6.93889e-17	No Effect
h2mb4p[h]	-0.130761	-0.130761	0	No Effect
h2o[c]	0	0	0	No Effect
h2o[e]	0	0	0	No Effect
h2o[f]	0	0	0	No Effect
h2o[h]	0	-1.30153e-17	1.30153e-17	No Effect
h2o[m]	0	0	0	No Effect
h2o[n]	0	0	0	No Effect
h2o[s]	0	-1.30153e-17	1.30153e-17	No Effect
h2o[u]	0	-1.30153e-17	1.30153e-17	No Effect
h2o[x]	0	0	0	No Effect
h2o2[c]	-1.82049e-33	7.22974e-17	7.22974e-17	No Effect
h2o2[h]	-0.00934009	-0.00934009	1.04083e-17	No Effect
h2o2[m]	-1.4478e-33	7.22974e-17	7.22974e-17	No Effect
h2o2[n]	-1.82049e-33	7.22974e-17	7.22974e-17	No Effect
h2o2[x]	-1.77503e-33	7.22974e-17	7.22974e-17	No Effect
h2s[h]	-0.0280203	-0.0280203	0	No Effect
hcarn[c]	0	0	0	No Effect
hco3[c]	1.27822e-33	1.54403e-17	1.54403e-17	No Effect
hco3[e]	4.33677e-34	-1.30153e-17	1.30153e-17	No Effect
hco3[h]	1.34261e-33	-9.97213e-18	9.97213e-18	No Effect
hco3[m]	1.37614e-33	2.84557e-17	2.84557e-17	No Effect
hcys-L[c]	-0.0934009	-0.0934009	1.94289e-16	No Effect
hcys-L[h]	-0.0934009	-0.0934009	1.94289e-16	No Effect
hcys-L[m]	-0.0934009	-0.0934009	1.94289e-16	No Effect
hdca[c]	-0.224162	-0.224162	2.9976e-15	No Effect
hdca[h]	-0.224162	-0.224162	2.9976e-15	No Effect
hdca[s]	-0.224162	-0.224162	2.9976e-15	No Effect
hdcea[c]	-0.256852	-0.256852	3.9968e-15	No Effect
hdcea[h]	-0.256852	-0.256852	3.9968e-15	No Effect
hdd2coa[m]	-0.663146	-0.663146	2.9976e-15	No Effect
hdd2coa[x]	-0.672486	-0.672486	2.9976e-15	No Effect
hdeACP[h]	-0.219492	-0.135431	0.0840608	Change
hemeA[m]	-1.08345	-1.08345	0	No Effect
hemeO[m]	-1.08345	-1.08345	0	No Effect
hexACP[h]	0.0467004	0	0.0467004	Change
hgentis[c]	-0.158782	-0.158782	0	No Effect
hgentis[h]	-0.158782	-0.158782	0	No Effect
his-L[c]	-0.130761	-0.130761	0	No Effect
his-L[e]	-0.130761	-0.130761	0	No Effect
his-L[h]	-0.130761	-0.130761	0	No Effect
hisp[c]	-0.130761	-0.130761	0	No Effect
hisp[h]	-0.158782	-0.158782	9.99201e-16	No Effect
hista[c]	-0.130761	-0.130761	0	No Effect
histd[c]	-0.130761	-0.130761	0	No Effect
histd[h]	-0.149441	-0.149441	0	No Effect
histrna[c]	-0.130761	-0.130761	0	No Effect
hmbil[h]	-0.747207	-0.747207	0	No Effect
hmgcoa[c]	-0.523045	-0.523045	0	No Effect
hmgcoa[m]	-0.523045	-0.523045	0	No Effect
hmppp9me[h]	-0.728527	-0.728527	0	No Effect
hom-L[h]	-0.0653806	-0.0653806	1.94289e-16	No Effect
hpglu[m]	0.0186802	0.0186802	0	No Effect
hpyr[c]	-0.0373604	-0.0373604	2.01228e-16	No Effect
hpyr[m]	-0.0373604	-0.0467004	0.00934009	Change
hso3[c]	1.23707e-16	-9.63132e-17	2.2002e-16	No Effect
hso3[e]	-0.00934009	-0.00934009	3.40006e-16	No Effect
hso3[h]	1.23707e-16	-9.63132e-17	2.2002e-16	No Effect
hso3[m]	-2.24224e-33	7.22974e-17	7.22974e-17	No Effect
hx2coa[m]	-0.523045	-0.523045	9.99201e-16	No Effect
hx2coa[x]	-0.523045	-0.523045	9.99201e-16	No Effect
hxan[c]	-0.112081	-0.112081	9.99201e-16	No Effect
hxan[e]	-0.112081	-0.112081	9.99201e-16	No Effect
hxcoa[m]	-0.523045	-0.523045	9.99201e-16	No Effect
hxcoa[x]	-0.523045	-0.532385	0.00934009	Change
hxdcal[c]	-0.214822	-0.214822	4.02456e-15	No Effect
hxdceal[c]	-0.214822	-0.214822	4.02456e-15	No Effect
ibcoa[m]	-0.485685	-0.485685	0	No Effect
icit[c]	-0.0747207	-0.0747207	3.05311e-16	No Effect
icit[h]	-0.0840608	-0.0840608	9.71445e-17	No Effect
icit[m]	-0.0747207	-0.0747207	3.05311e-16	No Effect
icit[x]	-0.0747207	-0.0747207	3.05311e-16	No Effect
idp[c]	-0.224162	-0.224162	9.99201e-16	No Effect
idp[m]	0	0	0	No Effect
ile-L[c]	-0.102741	-0.102741	9.99201e-16	No Effect
ile-L[h]	-0.102741	-0.102741	9.99201e-16	No Effect
ile-L[m]	-0.102741	-0.102741	9.99201e-16	No Effect
iletrna[c]	-0.102741	-0.102741	9.99201e-16	No Effect
im4ac[c]	-0.130761	-0.130761	0	No Effect
im4act[c]	-0.130761	-0.130761	0	No Effect
imacp[c]	-0.130761	-0.130761	0	No Effect
imacp[h]	-0.149441	-0.149441	9.99201e-16	No Effect
imp[c]	-0.214822	-0.214822	9.99201e-16	No Effect
imp[h]	-0.214822	-0.214822	9.99201e-16	No Effect
imp[m]	-0.214822	-0.214822	9.99201e-16	No Effect
indole[h]	-0.158782	-0.158782	0	No Effect
inost[c]	-0.112081	-0.112081	0	No Effect
inost[h]	0	0	0	No Effect
ins[c]	-0.205482	-0.205482	9.99201e-16	No Effect
ipdp[c]	-0.140101	-0.140101	0	No Effect
ipdp[h]	-0.140101	-0.140101	0	No Effect
itp[c]	-0.224162	-0.224162	9.99201e-16	No Effect
itp[m]	0	0	0	No Effect
ivcoa[m]	-0.523045	-0.523045	0	No Effect
lac-D[c]	-0.0373604	-0.0373604	2.01228e-16	No Effect
lac-D[e]	-0.0373604	-0.0373604	2.98372e-16	No Effect
lac-D[m]	-0.0373604	-0.0373604	2.01228e-16	No Effect
lac-L[h]	-0.0467004	-0.0467004	2.98372e-16	No Effect
lac-L[m]	-0.0373604	-0.0373604	2.01228e-16	No Effect
lac-L[x]	0	0	0	No Effect
lald-D[c]	1.38778e-16	-8.39668e-17	2.22745e-16	No Effect
lanost[c]	-0.0140101	-0.0140101	1.39992e-15	No Effect
lcts[h]	-0.311336	-0.311336	0	No Effect
Lcyst[h]	0	0	0	No Effect
Lcyst[m]	0	0	0	No Effect
Lcystin[h]	-0.0373604	-0.0373604	2.01228e-16	No Effect
leu-L[c]	-0.0934009	-0.0934009	8.04912e-16	No Effect
leu-L[e]	-0.0934009	-0.0934009	8.04912e-16	No Effect
leu-L[h]	-0.0934009	-0.0934009	8.04912e-16	No Effect
leu-L[m]	-0.0934009	-0.0934009	8.04912e-16	No Effect
leutrna[c]	0	0	0	No Effect
Lfmkynr[c]	-0.196142	-0.196142	9.99201e-16	No Effect
lgt-S[c]	4.66331e-17	0	4.66331e-17	No Effect
lgt-S[m]	-0.0373604	-0.0373604	2.98372e-16	No Effect
lido[c]	-0.0186802	-0.0186802	1.97758e-16	No Effect
lido[e]	-0.0186802	-0.0186802	1.97758e-16	No Effect
Lkynr[c]	-0.186802	-0.186802	0	No Effect
lnlc[c]	-0.270863	-0.270863	3.9968e-15	No Effect
lnlc[h]	-0.270863	-0.270863	3.9968e-15	No Effect
lnlccoa[c]	-0.709847	-0.709847	3.9968e-15	No Effect
lnlnca[c]	0	0	0	No Effect
lnlncacoa[c]	-0.438984	-0.438984	0	No Effect
lnlncg[c]	-0.270863	-0.270863	3.9968e-15	No Effect
lnlncgcoa[c]	-0.709847	-0.709847	3.9968e-15	No Effect
loroxan[u]	-0.99939	-0.99939	9.99201e-16	No Effect
lpam[h]	0.00934009	0.00934009	2.94903e-17	No Effect
lpam[m]	0.102741	0.102741	9.99201e-16	No Effect
lpro[m]	0.0186802	0.0186802	9.71445e-17	No Effect
lthstrl[c]	0.00467004	0.00467004	1.50054e-16	No Effect
lumirhodopsin[s]	-0.485685	-0.485685	9.99201e-16	No Effect
lut[u]	-0.99005	-0.99005	9.99201e-16	No Effect
lyc[h]	-0.971369	-0.971369	9.99201e-16	No Effect
lys-L[c]	-0.0934009	-0.0934009	7.07767e-16	No Effect
lys-L[m]	-5.55112e-17	5.55112e-17	1.11022e-16	No Effect
lystrna[m]	0	0	0	No Effect
mag160[c]	-0.270863	-0.270863	3.9968e-15	No Effect
mag180[c]	-0.317563	-0.308223	0.00934009	Change
mag18111Z[c]	-0.350253	-0.350253	3.9968e-15	No Effect
mag1819Z[c]	-0.317563	-0.317563	3.9968e-15	No Effect
malACP[h]	0.00934009	0.0934009	0.0840608	Change
malcoa[c]	-0.485685	-0.485685	9.99201e-16	No Effect
malcoa[h]	-0.467004	-0.467004	0	No Effect
mal-L[c]	-0.0467004	-0.0467004	1.94289e-16	No Effect
mal-L[f]	-0.0467004	-0.0467004	2.98372e-16	No Effect
mal-L[h]	-0.0467004	-0.0467004	1.94289e-16	No Effect
mal-L[m]	-0.0467004	-0.0467004	1.94289e-16	No Effect
mal-L[x]	-0.0747207	-0.0467004	0.0280203	Change
man[c]	-0.208595	-0.208595	0	No Effect
man[h]	-0.208595	-0.208595	0	No Effect
man1p[c]	-0.112081	-0.112081	0	No Effect
man6p[c]	-0.112081	-0.112081	0	No Effect
man6p[h]	-0.217935	-0.217935	9.99201e-16	No Effect
meglyxyl[c]	0	0	0	No Effect
meglyxyl[e]	0	0	0	No Effect
melib[h]	-0.311336	-0.311336	0	No Effect
melt[h]	-0.320676	-0.320676	0	No Effect
menecyart[c]	-0.0326903	-0.0326903	1.29757e-15	No Effect
mercppyr[h]	-0.0560405	-0.0560405	2.98372e-16	No Effect
mercppyr[m]	-6.75391e-18	2.51396e-17	3.18935e-17	No Effect
mergtrol[c]	-0.0140101	-0.0140101	4.00721e-16	No Effect
metarhodopsin[s]	-0.485685	-0.485685	9.99201e-16	No Effect
methf[c]	-2.07116e-16	8.67275e-17	2.93843e-16	No Effect
methf[h]	-2.07116e-16	6.1315e-17	2.68431e-16	No Effect
methf[m]	-2.07116e-16	8.67275e-17	2.93843e-16	No Effect
methf[x]	-1.37384e-16	8.67275e-17	2.24111e-16	No Effect
met-L[c]	-0.112081	-0.112081	0	No Effect
met-L[m]	-0.112081	-0.112081	0	No Effect
mettrna[c]	-0.112081	-0.112081	0	No Effect
mfecostrl[c]	-0.0140101	-0.0140101	1.99493e-16	No Effect
mfor[h]	-0.765887	-0.765887	0	No Effect
mg2[c]	0	0	0	No Effect
mg2[e]	0	0	0	No Effect
mg2[h]	0	0	0	No Effect
mg2[u]	0	0	0	No Effect
mgdg1819Z160[h]	-0.663146	-0.663146	7.99361e-15	No Effect
mgdg1819Z1617Z[h]	-0.695837	-0.695837	6.99441e-15	No Effect
mgdg1819Z1619Z[h]	-0.695837	-0.695837	7.99361e-15	No Effect
mgdg1819Z1627Z10Z[h]	-0.728527	-0.728527	6.99441e-15	No Effect
mgdg1819Z1637Z10Z13Z[h]	-0.761217	-0.761217	6.99441e-15	No Effect
mgdg1819Z1644Z7Z10Z13Z[h]	-0.793908	-0.793908	5.9952e-15	No Effect
mgdg1829Z12Z160[h]	-0.695837	-0.695837	6.99441e-15	No Effect
mgdg1829Z12Z1617Z[h]	-0.728527	-0.728527	6.99441e-15	No Effect
mgdg1829Z12Z1619Z[h]	-0.728527	-0.728527	6.99441e-15	No Effect
mgdg1829Z12Z1627Z10Z[h]	-0.761217	-0.761217	6.99441e-15	No Effect
mgdg1829Z12Z1634Z7Z10Z[h]	-0.793908	-0.793908	6.99441e-15	No Effect
mgdg1829Z12Z1637Z10Z13Z[h]	-0.793908	-0.793908	6.99441e-15	No Effect
mgdg1829Z12Z1644Z7Z10Z13Z[h]	-0.826598	-0.826598	5.9952e-15	No Effect
mgdg1839Z12Z15Z160[h]	-0.728527	-0.728527	6.99441e-15	No Effect
mgdg1839Z12Z15Z1627Z10Z[h]	-0.793908	-0.793908	5.9952e-15	No Effect
mgdg1839Z12Z15Z1634Z7Z10Z[h]	-0.826598	-0.826598	6.99441e-15	No Effect
mgdg1839Z12Z15Z1637Z10Z13Z[h]	-0.826598	-0.826598	6.99441e-15	No Effect
mgdg1839Z12Z15Z1644Z7Z10Z13Z[h]	-0.859288	-0.859288	6.99441e-15	No Effect
mhpglu[m]	0	0	0	No Effect
mi12356p[c]	-0.00934009	-0.00934009	1.70003e-16	No Effect
mi13456p[c]	0	0	0	No Effect
mi13456p[n]	-0.429644	-0.429644	1.9984e-15	No Effect
mi1345p[c]	-0.112081	-0.112081	0	No Effect
mi1345p[n]	0	2.84557e-17	2.84557e-17	No Effect
mi1346p[c]	-0.121421	-0.121421	0	No Effect
mi134p[c]	-0.112081	-0.112081	0	No Effect
mi134p[n]	0	0	0	No Effect
mi1456p[c]	-0.121421	-0.121421	0	No Effect
mi1456p[n]	-0.214822	-0.214822	9.99201e-16	No Effect
mi145p[c]	-0.112081	-0.112081	0	No Effect
mi145p[n]	0	2.84557e-17	2.84557e-17	No Effect
mi14p[c]	-0.112081	-0.112081	0	No Effect
mi14p[n]	0	0	0	No Effect
mi1p-D[c]	-0.112081	-0.112081	0	No Effect
mi3456p[c]	0.00934009	0.00934009	1.40513e-16	No Effect
mi34p[c]	-0.112081	-0.112081	0	No Effect
mi34p[n]	0	2.84557e-17	2.84557e-17	No Effect
mi3p-D[c]	-0.112081	-0.112081	0	No Effect
mi3p-D[n]	0	0	0	No Effect
mi4p-D[c]	-0.112081	-0.112081	0	No Effect
minohp[c]	-0.00934009	-0.00934009	1.40513e-16	No Effect
mlthf[c]	1.3962e-33	-3.30169e-18	3.30169e-18	No Effect
mlthf[m]	9.30798e-34	-3.30169e-18	3.30169e-18	No Effect
mm[m]	-0.0467004	-0.0467004	1.94289e-16	No Effect
mma[c]	-0.0280203	-0.0280203	0	No Effect
mmsa[m]	-0.0467004	-0.0467004	2.98372e-16	No Effect
mnt[h]	-0.414077	-0.414077	0	No Effect
mppp9[h]	-0.700507	-0.700507	0	No Effect
mppp9me[h]	-0.719187	-0.719187	0	No Effect
mpq[h]	-0.672486	-0.672486	9.99201e-16	No Effect
msa[m]	-0.0280203	-0.0280203	1.97758e-16	No Effect
mthgxl[c]	0	0	0	No Effect
mthgxl[x]	-0.0467004	-0.0467004	3.95517e-16	No Effect
myrsACP[h]	-0.140101	-0.186802	0.0467004	Change
na1[c]	-1.31369e-33	-2.84557e-17	2.84557e-17	No Effect
na1[e]	0	0	0	No Effect
na1[h]	-1.31369e-33	0	1.31369e-33	No Effect
na1[m]	0	-2.84557e-17	2.84557e-17	No Effect
na1[x]	-7.63278e-17	0	7.63278e-17	No Effect
nac[c]	0.102741	0.102741	9.99201e-16	No Effect
nad[c]	-0.214822	-0.214822	9.99201e-16	No Effect
nad[f]	-1.66533e-16	9.02056e-17	2.56739e-16	No Effect
nad[h]	-0.205482	-0.205482	9.99201e-16	No Effect
nad[m]	-0.214822	-0.214822	9.99201e-16	No Effect
nad[n]	-0.214822	-0.214822	9.99201e-16	No Effect
nad[s]	-0.205482	-0.205482	9.99201e-16	No Effect
nad[x]	-0.214822	-0.214822	9.99201e-16	No Effect
nadh[c]	-0.214822	-0.214822	9.99201e-16	No Effect
nadh[f]	0	0	0	No Effect
nadh[h]	-0.214822	-0.214822	9.99201e-16	No Effect
nadh[m]	-0.214822	-0.214822	9.99201e-16	No Effect
nadh[s]	-0.214822	-0.214822	9.99201e-16	No Effect
nadh[x]	-0.214822	-0.214822	9.99201e-16	No Effect
nadp[c]	-0.214822	-0.214822	9.99201e-16	No Effect
nadp[f]	-0.214822	-0.214822	9.99201e-16	No Effect
nadp[h]	-0.214822	-0.214822	9.99201e-16	No Effect
nadp[m]	0	0	0	No Effect
nadp[n]	0	0	0	No Effect
nadp[s]	-0.214822	-0.214822	9.99201e-16	No Effect
nadp[u]	-0.214822	-0.214822	9.99201e-16	No Effect
nadp[x]	-0.214822	-0.214822	9.99201e-16	No Effect
nadph[c]	-0.214822	-0.214822	9.99201e-16	No Effect
nadph[f]	-0.214822	-0.214822	9.99201e-16	No Effect
nadph[h]	-0.224162	-0.224162	9.99201e-16	No Effect
nadph[m]	-8.55594e-32	3.17573e-17	3.17573e-17	No Effect
nadph[n]	0	0	0	No Effect
nadph[s]	-0.224162	-0.224162	9.99201e-16	No Effect
nadph[u]	-0.224162	-0.224162	9.99201e-16	No Effect
nadph[x]	-0.214822	-0.214822	9.99201e-16	No Effect
ncam[c]	0.102741	0.102741	9.99201e-16	No Effect
neoxan[u]	-0.99005	-0.99005	9.99201e-16	No Effect
nh4[c]	4.75009e-34	2.84557e-17	2.84557e-17	No Effect
nh4[e]	0	0	0	No Effect
nh4[h]	7.53087e-34	3.04319e-18	3.04319e-18	No Effect
nh4[m]	0	2.84557e-17	2.84557e-17	No Effect
nh4[n]	4.75009e-34	2.84557e-17	2.84557e-17	No Effect
nh4[x]	6.16957e-34	2.84557e-17	2.84557e-17	No Effect
nicrns[c]	0	0	0	No Effect
nicrnt[c]	0	2.84557e-17	2.84557e-17	No Effect
nicrnt[n]	0	0	0	No Effect
nmn[c]	5.85958e-17	7.68692e-17	1.82734e-17	No Effect
nmn[n]	0	-2.77556e-17	2.77556e-17	No Effect
no[c]	3.8831e-17	-1.20501e-16	1.59332e-16	No Effect
no[h]	0	0	0	No Effect
no2[c]	1.12286e-16	-2.20898e-16	3.33184e-16	No Effect
no2[e]	1.12286e-16	-2.20898e-16	3.33184e-16	No Effect
no2[h]	1.12286e-16	-2.20898e-16	3.33184e-16	No Effect
no3[c]	0	-1.35526e-16	1.35526e-16	No Effect
no3[e]	0	-1.35526e-16	1.35526e-16	No Effect
norsp[h]	-1.82438e-16	2.60306e-17	2.08469e-16	No Effect
NPmehis[c]	0	0	0	No Effect
nwharg[c]	-0.0840608	-0.0840608	4.02456e-16	No Effect
o2[c]	0	0	0	No Effect
o2[e]	0	0	0	No Effect
o2[h]	0	2.38555e-30	2.38555e-30	No Effect
o2[m]	0	2.37777e-30	2.37777e-30	No Effect
o2[n]	0	0	0	No Effect
o2[u]	0	2.38007e-30	2.38007e-30	No Effect
o2[x]	0	2.37982e-30	2.37982e-30	No Effect
o2D[u]	0.0186802	0.0186802	0	No Effect
oaa[c]	-0.0467004	-0.0467004	9.71445e-17	No Effect
oaa[f]	-0.0467004	-0.0467004	9.71445e-17	No Effect
oaa[h]	-0.0373604	-0.0373604	2.01228e-16	No Effect
oaa[m]	-0.0467004	-0.0467004	1.94289e-16	No Effect
oaa[x]	-0.0747207	-0.0467004	0.0280203	Change
obfool[c]	-0.0233502	-0.0233502	9.99201e-16	No Effect
oc2coa[m]	-0.551065	-0.551065	9.99201e-16	No Effect
oc2coa[x]	-0.551065	-0.560405	0.00934009	Change
ocACP[h]	0	-0.0467004	0.0467004	Change
occoa[m]	-0.551065	-0.551065	9.99201e-16	No Effect
occoa[x]	-0.551065	-0.560405	0.00934009	Change
ocdca[c]	-0.270863	-0.270863	3.9968e-15	No Effect
ocdca[h]	-0.270863	-0.270863	3.9968e-15	No Effect
ocdcaACP[h]	-0.233502	-0.149441	0.0840608	Change
ocdccoa[c]	-0.709847	-0.709847	2.9976e-15	No Effect
ocdce9a[c]	-0.270863	-0.270863	3.9968e-15	No Effect
ocdce9a[h]	-0.270863	-0.270863	3.9968e-15	No Effect
ocdce9coa[c]	-0.709847	-0.709847	3.9968e-15	No Effect
ocdcea[c]	-0.303553	-0.303553	2.9976e-15	No Effect
ocdcea[h]	-0.303553	-0.303553	2.9976e-15	No Effect
ocdcecoa[c]	-0.742537	-0.742537	3.9968e-15	No Effect
octa[h]	-0.0373604	-0.168122	0.130761	Change
octe9ACP[h]	-0.233502	-0.149441	0.0840608	Change
octeACP[h]	-0.266193	-0.182132	0.0840608	Change
od2coa[c]	-0.709847	-0.709847	2.9976e-15	No Effect
omppp9me[h]	-0.737867	-0.737867	0	No Effect
orn[c]	-0.0840608	-0.0840608	3.05311e-16	No Effect
orn[e]	-0.0840608	-0.0840608	3.05311e-16	No Effect
orn[h]	-0.0840608	-0.0840608	3.05311e-16	No Effect
orn[m]	-0.0840608	-0.0840608	3.05311e-16	No Effect
orot[c]	-0.0467004	-0.0467004	1.94289e-16	No Effect
orot[m]	-0.0467004	-0.0467004	1.94289e-16	No Effect
orot5p[c]	-0.149441	-0.149441	0	No Effect
oxa[m]	-0.00934009	-0.00934009	3.98986e-17	No Effect
pa[c]	-0.270863	-0.270863	3.9968e-15	No Effect
pa160[h]	-0.523045	-0.523045	5.9952e-15	No Effect
pa16018111Z[c]	-0.574416	-0.574416	6.99441e-15	No Effect
pa1601819Z[c]	-0.541725	-0.541725	7.99361e-15	No Effect
pa1601819Z[h]	-0.569745	-0.569745	6.99441e-15	No Effect
pa1801819Z[c]	-0.588426	-0.588426	7.99361e-15	No Effect
pa1801819Z[h]	-0.616446	-0.616446	6.99441e-15	No Effect
pa1801829Z12Z[c]	-0.607106	-0.607106	6.99441e-15	No Effect
pa1801835Z9Z12Z[c]	-0.607106	-0.607106	6.99441e-15	No Effect
pa1801845Z9Z12Z15Z[c]	-0.607106	-0.607106	7.99361e-15	No Effect
pa18111Z160[c]	-0.574416	-0.574416	6.99441e-15	No Effect
pa18111Z160[h]	-0.602436	-0.602436	5.9952e-15	No Effect
pa18111Z18111Z[c]	-0.653806	-0.653806	7.99361e-15	No Effect
pa18111Z1819Z[c]	-0.621116	-0.621116	7.99361e-15	No Effect
pa18111Z1819Z[h]	-0.649136	-0.649136	6.99441e-15	No Effect
pa18111Z1829Z12Z[c]	-0.639796	-0.639796	7.99361e-15	No Effect
pa18111Z1835Z9Z12Z[c]	-0.639796	-0.639796	7.99361e-15	No Effect
pa18111Z1845Z9Z12Z15Z[c]	-0.639796	-0.639796	7.99361e-15	No Effect
pa1819Z160[c]	-0.541725	-0.541725	6.99441e-15	No Effect
pa1819Z160[h]	-0.569745	-0.569745	5.9952e-15	No Effect
pa1819Z1619Z[h]	-0.602436	-0.602436	6.99441e-15	No Effect
pa1819Z18111Z[c]	-0.621116	-0.621116	7.99361e-15	No Effect
pa1819Z18111Z[h]	-0.00934009	-0.649136	0.639796	Change
pa1819Z1819Z[c]	-0.588426	-0.588426	7.99361e-15	No Effect
pa1819Z1819Z[h]	-0.616446	-0.616446	6.99441e-15	No Effect
pa1819Z1829Z12Z[c]	-0.607106	-0.607106	7.99361e-15	No Effect
pa1819Z1835Z9Z12Z[c]	-0.607106	-0.607106	7.99361e-15	No Effect
pa1819Z1845Z9Z12Z15Z[c]	-0.607106	-0.607106	7.99361e-15	No Effect
pa1829Z12Z1835Z9Z12Z[c]	-0.607106	-0.607106	7.99361e-15	No Effect
pacoa[c]	-0.709847	-0.709847	3.9968e-15	No Effect
pail18111Z160[c]	-0.695837	-0.695837	7.99361e-15	No Effect
pail18111Z160[e]	-0.705177	-0.705177	6.99441e-15	No Effect
pail1819Z160[c]	-0.663146	-0.663146	6.99441e-15	No Effect
pail1819Z160[e]	-0.672486	-0.672486	6.99441e-15	No Effect
palmACP[h]	-0.186802	-0.102741	0.0840608	Change
pan4p[c]	-0.214822	-0.214822	9.99201e-16	No Effect
pant-R[c]	-0.0934009	-0.0934009	9.02056e-16	No Effect
pant-R[m]	-0.0934009	-0.0934009	7.07767e-16	No Effect
pant-R[n]	-0.0934009	-0.0934009	7.07767e-16	No Effect
pap[c]	-0.214822	-0.214822	9.99201e-16	No Effect
pap[h]	-0.214822	-0.214822	9.99201e-16	No Effect
paps[c]	-0.214822	-0.214822	9.99201e-16	No Effect
paps[h]	-0.214822	-0.214822	9.99201e-16	No Effect
paps[m]	-0.214822	-0.214822	9.99201e-16	No Effect
pccu1p[u]	0	0	0	No Effect
pccu2p[u]	0.00467004	0.00467004	1.99493e-17	No Effect
pcdme[h]	-0.270863	-0.270863	9.99201e-16	No Effect
pchlda[h]	-0.756547	-0.756547	0	No Effect
pdp[h]	-0.532385	-0.532385	0	No Effect
pdp[u]	-0.532385	-0.532385	0	No Effect
pdx5p[c]	0	0	0	No Effect
pe1801819Z[c]	-0.644466	-0.644466	6.99441e-15	No Effect
pe1801819Z[e]	-0.653806	-0.653806	6.99441e-15	No Effect
pe1801829Z12Z[c]	-0.644466	-0.644466	7.99361e-15	No Effect
pe1801829Z12Z[e]	-0.653806	-0.653806	6.99441e-15	No Effect
pe1801835Z9Z12Z[c]	-0.644466	-0.644466	7.99361e-15	No Effect
pe1801835Z9Z12Z[e]	-0.653806	-0.653806	7.99361e-15	No Effect
pe1801845Z9Z12Z15Z[c]	-0.644466	-0.644466	7.99361e-15	No Effect
pe1801845Z9Z12Z15Z[e]	-0.653806	-0.653806	7.99361e-15	No Effect
pe18111Z1819Z[c]	-0.677157	-0.677157	7.99361e-15	No Effect
pe18111Z1819Z[e]	-0.686497	-0.686497	6.99441e-15	No Effect
pe18111Z1829Z12Z[c]	-0.677157	-0.677157	7.99361e-15	No Effect
pe18111Z1829Z12Z[e]	-0.686497	-0.686497	7.99361e-15	No Effect
pe18111Z1835Z9Z12Z[c]	-0.677157	-0.677157	7.99361e-15	No Effect
pe18111Z1835Z9Z12Z[e]	-0.686497	-0.686497	7.99361e-15	No Effect
pe18111Z1845Z9Z12Z15Z[c]	-0.677157	-0.677157	7.99361e-15	No Effect
pe18111Z1845Z9Z12Z15Z[e]	-0.686497	-0.686497	8.99281e-15	No Effect
pe1819Z1819Z[c]	-0.644466	-0.644466	7.99361e-15	No Effect
pe1819Z1819Z[e]	-0.653806	-0.653806	6.99441e-15	No Effect
pe1819Z1829Z12Z[c]	-0.644466	-0.644466	7.99361e-15	No Effect
pe1819Z1829Z12Z[e]	-0.653806	-0.653806	6.99441e-15	No Effect
pe1819Z1835Z9Z12Z[c]	-0.644466	-0.644466	7.99361e-15	No Effect
pe1819Z1835Z9Z12Z[e]	-0.653806	-0.653806	7.99361e-15	No Effect
pe1819Z1845Z9Z12Z15Z[c]	-0.644466	-0.644466	7.99361e-15	No Effect
pe1819Z1845Z9Z12Z15Z[e]	-0.653806	-0.653806	7.99361e-15	No Effect
pe1829Z12Z1835Z9Z12Z[c]	-0.644466	-0.644466	7.99361e-15	No Effect
pe1829Z12Z1835Z9Z12Z[e]	-0.653806	-0.653806	7.99361e-15	No Effect
pep[c]	-0.0467004	-0.0467004	9.71445e-17	No Effect
pep[f]	0	0	0	No Effect
pep[h]	-0.0467004	-0.0467004	0	No Effect
pep[m]	-0.0467004	-0.0467004	9.71445e-17	No Effect
pg18111Z160[c]	-0.630456	-0.630456	7.99361e-15	No Effect
pg18111Z160[e]	-0.639796	-0.639796	7.99361e-15	No Effect
pg18111Z160[h]	-0.667816	-0.667816	6.99441e-15	No Effect
pg18111Z1613E[h]	-0.700507	-0.700507	6.99441e-15	No Effect
pg1819Z160[c]	-0.597766	-0.597766	7.99361e-15	No Effect
pg1819Z160[e]	-0.607106	-0.607106	6.99441e-15	No Effect
pg1819Z160[h]	-0.635126	-0.635126	6.99441e-15	No Effect
pg1819Z1613E[h]	-0.667816	-0.667816	5.9952e-15	No Effect
pg1829Z12Z160[h]	-0.667816	-0.667816	6.99441e-15	No Effect
pg1829Z12Z1613E[h]	-0.700507	-0.700507	5.9952e-15	No Effect
pg1839Z12Z15Z160[h]	-0.700507	-0.700507	5.9952e-15	No Effect
pg1839Z12Z15Z1613E[h]	-0.733197	-0.733197	5.9952e-15	No Effect
pgp18111Z160[c]	-0.630456	-0.630456	7.99361e-15	No Effect
pgp18111Z160[e]	-0.639796	-0.639796	7.99361e-15	No Effect
pgp18111Z160[h]	-0.677157	-0.677157	5.9952e-15	No Effect
pgp1819Z160[c]	-0.597766	-0.597766	7.99361e-15	No Effect
pgp1819Z160[e]	-0.607106	-0.607106	6.99441e-15	No Effect
pgp1819Z160[h]	-0.644466	-0.644466	5.9952e-15	No Effect
phe-L[c]	-0.158782	-0.158782	9.99201e-16	No Effect
phe-L[h]	-0.158782	-0.158782	9.99201e-16	No Effect
phe-L[m]	0	-1.38778e-17	1.38778e-17	No Effect
pheme[c]	-0.700507	-0.700507	0	No Effect
pheme[h]	-0.700507	-0.700507	0	No Effect
pheme[m]	-0.700507	-0.700507	0	No Effect
phen[c]	0	2.84557e-17	2.84557e-17	No Effect
phetrna[m]	5.55112e-17	-8.32667e-17	1.38778e-16	No Effect
phom[c]	0.0467004	0.0467004	1.94289e-16	No Effect
phom[h]	-0.0747207	-0.0747207	9.71445e-17	No Effect
photon298[c]	0	0	0	No Effect
photon437[u]	0	0	0	No Effect
photon438[u]	0	0	0	No Effect
photon450[h]	0	0	0	No Effect
photon490[s]	0	0	0	No Effect
photon646[h]	0	0	0	No Effect
photon673[u]	0	0	0	No Effect
photon680[u]	9.54098e-18	0	9.54098e-18	No Effect
photonVis[e]	0	0	0	No Effect
phphbda[h]	-0.765887	-0.765887	0	No Effect
phphtna[u]	-1.27959	-1.27959	0	No Effect
phpyr[c]	-0.158782	-0.158782	9.99201e-16	No Effect
phpyr[h]	-0.149441	-0.149441	0	No Effect
phpyr[m]	0	0	0	No Effect
phytfl[h]	0	0	0	No Effect
phyto[h]	-0.971369	-0.971369	1.9984e-15	No Effect
phytol[h]	-0.513705	-0.513705	9.99201e-16	No Effect
pi[c]	0	2.84557e-17	2.84557e-17	No Effect
pi[e]	0	0	0	No Effect
pi[f]	0	0	0	No Effect
pi[h]	-0.00934009	-0.00934009	2.09902e-16	No Effect
pi[m]	-6.59555e-34	2.84557e-17	2.84557e-17	No Effect
pi[n]	0	2.84557e-17	2.84557e-17	No Effect
pi[x]	6.97323e-17	7.91402e-30	6.97323e-17	No Effect
pmtcoa[c]	-0.663146	-0.663146	2.9976e-15	No Effect
pmtcoa[h]	-0.663146	-0.663146	2.9976e-15	No Effect
pmtcoa[m]	-0.663146	-0.663146	2.9976e-15	No Effect
pmtcoa[s]	-0.663146	-0.663146	2.9976e-15	No Effect
pmtcoa[x]	-0.672486	-0.672486	2.9976e-15	No Effect
pnto-R[c]	-0.140101	-0.140101	9.99201e-16	No Effect
pnto-R[m]	-0.140101	-0.140101	9.99201e-16	No Effect
ppa[c]	-0.0467004	-0.0467004	2.98372e-16	No Effect
ppa[h]	-0.0467004	-0.0467004	2.98372e-16	No Effect
ppa[m]	-0.0467004	-0.0467004	2.98372e-16	No Effect
ppad[m]	-0.261523	-0.261523	9.99201e-16	No Effect
ppap[h]	-0.0560405	-0.0560405	9.71445e-17	No Effect
ppap[m]	-0.0467004	-0.0467004	2.98372e-16	No Effect
ppbng[h]	-0.186802	-0.186802	0	No Effect
ppcoa[c]	-0.485685	-0.485685	0	No Effect
ppcoa[h]	-0.485685	-0.485685	0	No Effect
ppcoa[m]	-0.485685	-0.485685	0	No Effect
ppcoa[n]	0	0	0	No Effect
ppgpp[c]	-0.233502	-0.233502	1.9984e-15	No Effect
pphn[c]	-0.158782	-0.158782	9.99201e-16	No Effect
pphn[h]	-0.158782	-0.158782	9.99201e-16	No Effect
ppi[c]	-0.00934009	-0.00934009	1.80411e-16	No Effect
ppi[h]	-0.0186802	-0.0186802	3.98986e-16	No Effect
ppi[m]	-1.31911e-33	5.69113e-17	5.69113e-17	No Effect
ppi[n]	0	0	0	No Effect
ppi[u]	-0.0186802	-0.0186802	3.98986e-16	No Effect
ppp9[h]	-0.700507	-0.700507	0	No Effect
pppg9[h]	-0.728527	-0.728527	9.99201e-16	No Effect
pq[h]	0	0	0	No Effect
pq[u]	0	0	0	No Effect
pqh2[h]	-0.971369	-0.971369	1.9984e-15	No Effect
pqh2[u]	-0.00934009	-0.00934009	2.94903e-17	No Effect
pqqox[x]	0	0	0	No Effect
pqqrd[x]	-6.97323e-17	-7.90935e-30	6.97323e-17	No Effect
pram[c]	-0.112081	-0.112081	0	No Effect
pram[h]	-0.102741	-0.102741	0	No Effect
pran[h]	-0.224162	-0.224162	0	No Effect
prbamp[c]	-0.317563	-0.317563	9.99201e-16	No Effect
prbamp[h]	0	1.30153e-17	1.30153e-17	No Effect
prbatp[c]	-0.326903	-0.326903	9.99201e-16	No Effect
prbatp[h]	-0.0186802	-0.0186802	3.98986e-16	No Effect
prfp[c]	-0.317563	-0.317563	9.99201e-16	No Effect
prfp[h]	0	0	0	No Effect
prlp[c]	-0.317563	-0.317563	9.99201e-16	No Effect
prlp[h]	0	0	0	No Effect
pro-L[c]	-0.0840608	-0.0840608	4.996e-16	No Effect
pro-L[m]	-0.0840608	-0.0840608	4.996e-16	No Effect
protds[h]	0	0	0	No Effect
protdt[h]	-0.00934009	-0.00934009	2.94903e-17	No Effect
protrna[c]	-0.0840608	-0.0840608	5.13478e-16	No Effect
prpncoa[c]	-0.485685	-0.485685	0	No Effect
prpncoa[m]	-0.485685	-0.485685	0	No Effect
prpncoa[n]	0	0	0	No Effect
prpp[c]	-0.112081	-0.112081	0	No Effect
prpp[h]	-0.121421	-0.121421	9.99201e-16	No Effect
pser-L[h]	-0.0560405	-0.0467004	0.00934009	Change
psphings[c]	-0.261523	-0.261523	4.996e-15	No Effect
psqldp[c]	-0.0233502	-0.0233502	2.00187e-15	No Effect
ptrc[c]	-0.0840608	-0.0840608	4.02456e-16	No Effect
ptrc[h]	-0.0840608	-0.0840608	3.05311e-16	No Effect
ptrc[m]	-0.0747207	-0.0840608	0.00934009	Change
ptth[c]	-0.205482	-0.205482	1.9984e-15	No Effect
pyam5p[c]	0	0	0	No Effect
pydam[c]	0	-2.84557e-17	2.84557e-17	No Effect
pydx[c]	0.00934009	0.00934009	1.04083e-17	No Effect
pydx5p[c]	0.00934009	0.00934009	1.9082e-17	No Effect
pydxn[c]	0.00934009	0.00934009	2.01228e-16	No Effect
pyphphbda[h]	0	0	0	No Effect
pyr[c]	-0.0373604	-0.0373604	2.01228e-16	No Effect
pyr[f]	-0.0373604	-0.0373604	2.01228e-16	No Effect
pyr[h]	-0.0373604	-0.0373604	2.01228e-16	No Effect
pyr[m]	-0.0373604	-0.0373604	2.98372e-16	No Effect
pyr[x]	-0.0653806	-0.0513705	0.0140101	Change
q8[m]	0	0	0	No Effect
q8h2[m]	0	-5.68794e-18	5.68794e-18	No Effect
r1p[c]	-0.102741	-0.102741	0	No Effect
r1p[h]	-0.102741	-0.102741	0	No Effect
r5p[c]	-0.102741	-0.102741	0	No Effect
r5p[h]	-0.102741	-0.102741	0	No Effect
raffin[c]	-0.317563	-0.317563	0	No Effect
raffin[h]	-0.519932	-0.519932	0	No Effect
rb15bp[h]	-0.112081	-0.112081	0	No Effect
rdmbzi[c]	0	0	0	No Effect
retac[s]	-0.523045	-0.523045	9.99201e-16	No Effect
retinal[h]	-0.485685	-0.485685	9.99201e-16	No Effect
retinal[s]	-0.485685	-0.485685	9.99201e-16	No Effect
retinal-11-cis[s]	-0.485685	-0.485685	9.99201e-16	No Effect
retinol[s]	-0.495025	-0.495025	9.99201e-16	No Effect
retinol-cis-11[s]	-0.495025	-0.495025	9.99201e-16	No Effect
retpalm[s]	-0.719187	-0.719187	3.9968e-15	No Effect
retpalm-11-cis[s]	-0.719187	-0.719187	3.9968e-15	No Effect
rhodopsin[s]	-0.485685	-0.485685	9.99201e-16	No Effect
rib-D[c]	-0.0934009	-0.0934009	9.71445e-17	No Effect
rib-D[e]	-0.0934009	-0.0934009	9.71445e-17	No Effect
ribflv[c]	0	-2.84557e-17	2.84557e-17	No Effect
ribflv[h]	0	-2.84557e-17	2.84557e-17	No Effect
rnam[c]	5.85958e-17	4.84135e-17	1.01822e-17	No Effect
ru5p-D[c]	0.0747207	0.0747207	9.71445e-17	No Effect
ru5p-D[h]	-0.102741	-0.102741	0	No Effect
s[e]	0	0	0	No Effect
s17bp[h]	-0.149441	-0.149441	0	No Effect
s7p[h]	-0.140101	-0.140101	0	No Effect
sbt-D[h]	-0.217935	-0.217935	0	No Effect
scl[h]	-0.775227	-0.775227	0	No Effect
scys-L[c]	-0.0373604	-0.0373604	5.96745e-16	No Effect
scys-L[h]	-0.0560405	-0.0560405	4.996e-16	No Effect
scys-L[m]	-0.0373604	-0.0280203	0.00934009	Change
sdhlam[m]	0.0560405	0.0560405	6.03684e-16	No Effect
seahcys[c]	-0.130761	-0.130761	1.9984e-15	No Effect
sectrna[m]	-0.00934009	-0.00934009	1.9082e-16	No Effect
selcys[c]	0	0	0	No Effect
selcys[h]	-0.0373604	-0.0373604	2.98372e-16	No Effect
selcys[m]	-0.00934009	3.46945e-18	0.00934009	Change
selcyst[c]	0.0467004	0.0467004	1.94289e-16	No Effect
selcyst[h]	0	0	0	No Effect
selhcys[c]	0.0840608	0.0840608	4.02456e-16	No Effect
selhcys[h]	0.0373604	0.0373604	2.01228e-16	No Effect
seln[c]	0.0280203	0.0280203	1.97758e-16	No Effect
seln[h]	0	0	0	No Effect
seln[m]	0.0280203	0.0280203	1.97758e-16	No Effect
selnp[m]	0.0280203	0.0280203	1.97758e-16	No Effect
selt[c]	0.0560405	0.0560405	0	No Effect
selt[e]	0.0560405	0.0560405	0	No Effect
selt[m]	0.0560405	0.0560405	0	No Effect
ser-L[c]	-0.0373604	-0.0373604	2.01228e-16	No Effect
ser-L[h]	-0.0373604	-0.0373604	2.01228e-16	No Effect
ser-L[m]	-0.0373604	-0.0373604	2.01228e-16	No Effect
sertrna[c]	-0.0373604	-0.0373604	2.01228e-16	No Effect
sertrna-LPAREN-sec-RPAREN[m]	-0.0373604	-0.0373604	3.95517e-16	No Effect
sheme[h]	-0.775227	-0.775227	0	No Effect
skm[h]	-0.121421	-0.121421	9.99201e-16	No Effect
skm5p[h]	-0.130761	-0.130761	0	No Effect
so4[c]	1.29395e-33	2.84557e-17	2.84557e-17	No Effect
so4[e]	0	0	0	No Effect
so4[m]	-1.97413e-35	2.84557e-17	2.84557e-17	No Effect
so4[n]	1.29395e-33	2.84557e-17	2.84557e-17	No Effect
sph1p[c]	-0.261523	-0.261523	3.9968e-15	No Effect
sphgn[c]	-0.261523	-0.261523	3.9968e-15	No Effect
sphings[c]	-0.261523	-0.261523	3.9968e-15	No Effect
sphs1p[c]	-0.261523	-0.261523	3.9968e-15	No Effect
spmd[c]	0	-0.177462	0.177462	Change
spmd[h]	0.0934009	0.0934009	9.71445e-17	No Effect
spmd[m]	4.50663e-34	-0.177462	0.177462	Change
sprm[h]	0	0	0	No Effect
sqdg160[h]	-0.616446	-0.616446	8.10463e-15	No Effect
sqdg18111Z160[c]	-0.695837	-0.695837	7.99361e-15	No Effect
sqdg18111Z160[h]	-0.695837	-0.695837	7.99361e-15	No Effect
sqdg1819Z160[c]	-0.663146	-0.663146	7.99361e-15	No Effect
sqdg1819Z160[h]	-0.663146	-0.663146	7.99361e-15	No Effect
sqdg1829Z12Z160[h]	-0.695837	-0.695837	6.99441e-15	No Effect
sqdg1839Z12Z15Z160[h]	-0.728527	-0.728527	6.99441e-15	No Effect
sql[c]	-0.0140101	-0.0140101	1.60115e-15	No Effect
Ssq23epx[c]	-0.0140101	-0.0140101	1.39992e-15	No Effect
starch300[h]	-33.6243	-33.6243	0	No Effect
stc[h]	-0.622673	-0.622673	9.99201e-16	No Effect
stcoa[c]	-0.709847	-0.709847	3.9968e-15	No Effect
suc6p[c]	-0.214822	-0.214822	9.99201e-16	No Effect
sucald[c]	0	0	0	No Effect
succ[c]	-0.0467004	-0.0467004	1.94289e-16	No Effect
succ[e]	-0.0467004	-0.0467004	1.94289e-16	No Effect
succ[h]	7.25369e-18	-1.5191e-17	2.24447e-17	No Effect
succ[m]	-0.0467004	-0.0467004	1.94289e-16	No Effect
succoa[m]	-0.485685	-0.485685	0	No Effect
suchms[c]	0	0	0	No Effect
suchms[h]	-0.0653806	-0.0653806	1.94289e-16	No Effect
sucr[c]	-0.214822	-0.214822	9.99201e-16	No Effect
sucr[h]	-0.417191	-0.417191	0	No Effect
sucsal[h]	-0.00934009	-0.00934009	1.04083e-17	No Effect
sucsal[m]	-0.0467004	-0.0467004	1.94289e-16	No Effect
t3c11vaceACP[h]	-0.256852	-0.172792	0.0840608	Change
tag16018111Z160[c]	-0.798578	-0.798578	1.21014e-14	No Effect
tag16018111Z180[c]	-0.845278	-0.845278	1.09912e-14	No Effect
tag16018111Z18111Z[c]	-0.877968	-0.877968	1.11022e-14	No Effect
tag16018111Z1819Z[c]	-0.845278	-0.845278	1.09912e-14	No Effect
tag16018111Z1835Z9Z12Z[c]	-0.845278	-0.845278	1.19904e-14	No Effect
tag16018111Z1845Z9Z12Z15Z[c]	-0.845278	-0.845278	1.19904e-14	No Effect
tag1601819Z160[c]	-0.765887	-0.765887	1.09912e-14	No Effect
tag1601819Z180[c]	-0.812588	-0.812588	1.09912e-14	No Effect
tag1601819Z18111Z[c]	-0.845278	-0.845278	1.09912e-14	No Effect
tag1601819Z1819Z[c]	-0.812588	-0.812588	1.09912e-14	No Effect
tag1601819Z1835Z9Z12Z[c]	-0.812588	-0.812588	1.09912e-14	No Effect
tag1601819Z1845Z9Z12Z15Z[c]	-0.812588	-0.812588	1.19904e-14	No Effect
tag1801819Z160[c]	-0.812588	-0.812588	1.09912e-14	No Effect
tag1801819Z180[c]	-0.859288	-0.859288	1.19904e-14	No Effect
tag1801819Z18111Z[c]	-0.891979	-0.891979	1.09912e-14	No Effect
tag1801819Z1819Z[c]	-0.859288	-0.859288	1.19904e-14	No Effect
tag1801819Z1835Z9Z12Z[c]	-0.859288	-0.859288	1.19904e-14	No Effect
tag1801819Z1845Z9Z12Z15Z[c]	-0.859288	-0.859288	1.19904e-14	No Effect
tag18111Z18111Z160[c]	-0.877968	-0.877968	1.11022e-14	No Effect
tag18111Z18111Z180[c]	-0.924669	-0.924669	1.09912e-14	No Effect
tag18111Z18111Z18111Z[c]	-0.957359	-0.957359	1.09912e-14	No Effect
tag18111Z18111Z1819Z[c]	-0.924669	-0.924669	1.09912e-14	No Effect
tag18111Z18111Z1835Z9Z12Z[c]	-0.924669	-0.924669	1.19904e-14	No Effect
tag18111Z18111Z1845Z9Z12Z15Z[c]	-0.924669	-0.924669	1.29896e-14	No Effect
tag18111Z1819Z160[c]	-0.845278	-0.845278	1.09912e-14	No Effect
tag18111Z1819Z180[c]	-0.891979	-0.891979	1.19904e-14	No Effect
tag18111Z1819Z18111Z[c]	-0.924669	-0.924669	1.09912e-14	No Effect
tag18111Z1819Z1819Z[c]	-0.891979	-0.891979	1.09912e-14	No Effect
tag18111Z1819Z1835Z9Z12Z[c]	-0.891979	-0.891979	1.19904e-14	No Effect
tag18111Z1819Z1845Z9Z12Z15Z[c]	-0.891979	-0.891979	1.29896e-14	No Effect
tag1819Z18111Z160[c]	-0.845278	-0.845278	1.09912e-14	No Effect
tag1819Z18111Z180[c]	-0.891979	-0.891979	1.19904e-14	No Effect
tag1819Z18111Z18111Z[c]	-0.924669	-0.924669	1.09912e-14	No Effect
tag1819Z18111Z1819Z[c]	-0.891979	-0.891979	1.09912e-14	No Effect
tag1819Z18111Z1835Z9Z12Z[c]	-0.891979	-0.891979	1.19904e-14	No Effect
tag1819Z18111Z1845Z9Z12Z15Z[c]	-0.891979	-0.891979	1.19904e-14	No Effect
tag1819Z1819Z160[c]	-0.812588	-0.812588	1.09912e-14	No Effect
tag1819Z1819Z180[c]	-0.859288	-0.859288	1.09912e-14	No Effect
tag1819Z1819Z18111Z[c]	-0.891979	-0.891979	1.09912e-14	No Effect
tag1819Z1819Z1819Z[c]	-0.859288	-0.859288	1.19904e-14	No Effect
tag1819Z1819Z1835Z9Z12Z[c]	-0.859288	-0.859288	1.19904e-14	No Effect
tag1819Z1819Z1845Z9Z12Z15Z[c]	-0.859288	-0.859288	1.19904e-14	No Effect
td2coa[m]	-0.635126	-0.635126	2.9976e-15	No Effect
td2coa[x]	-0.644466	-0.644466	2.9976e-15	No Effect
tdcoa[m]	-0.635126	-0.635126	2.9976e-15	No Effect
tdcoa[x]	-0.644466	-0.644466	2.9976e-15	No Effect
tddec2eACP[h]	-0.0840608	-0.130761	0.0467004	Change
tdec2eACP[h]	-0.0373604	-0.0840608	0.0467004	Change
tega[c]	0	0	0	No Effect
tega[e]	0	0	0	No Effect
tfenfe2[h]	-0.00934009	-0.00934009	2.94903e-17	No Effect
tfenfe3[h]	0	0	0	No Effect
tgua[c]	0	0	0	No Effect
tgua[e]	0	0	0	No Effect
thcys[h]	0	0	0	No Effect
thdp[c]	-0.0934009	-0.0934009	6.10623e-16	No Effect
thex2eACP[h]	0.0560405	0.00934009	0.0467004	Change
thf[c]	0.0186802	0.0186802	1.97758e-16	No Effect
thf[h]	0	0	0	No Effect
thf[m]	0.0186802	0.0186802	1.97758e-16	No Effect
thfglu[c]	-0.0560405	-0.0560405	9.71445e-17	No Effect
thmpp[h]	0.0373604	0.0373604	2.01228e-16	No Effect
thmpp[m]	0.0373604	0.0373604	2.98372e-16	No Effect
thr-L[c]	-0.0560405	-0.0560405	2.98372e-16	No Effect
thr-L[h]	-0.0560405	-0.0560405	3.95517e-16	No Effect
thr-L[m]	-0.0560405	-0.0560405	2.98372e-16	No Effect
thrtrna[c]	-0.0560405	-0.0560405	2.98372e-16	No Effect
thrtrna[m]	-0.0560405	-0.0560405	3.95517e-16	No Effect
thymd[c]	-0.168122	-0.168122	0	No Effect
tmrs2eACP[h]	-0.130761	-0.177462	0.0467004	Change
toct2eACP[h]	0.00934009	-0.0373604	0.0467004	Change
toctd2eACP[h]	-0.224162	-0.140101	0.0840608	Change
tpalm2eACP[h]	-0.177462	-0.0934009	0.0840608	Change
trdox[c]	0	0	0	No Effect
trdox[h]	0	0	0	No Effect
trdrd[c]	8.86042e-17	-9.51841e-17	1.83788e-16	No Effect
trdrd[h]	-0.00934009	-0.00934009	0	No Effect
tre[c]	-0.205482	-0.205482	0	No Effect
tre6p[c]	-0.205482	-0.205482	0	No Effect
tre6p[n]	0	0	0	No Effect
trnaala[m]	0	0	0	No Effect
trnaarg[c]	0	0	0	No Effect
trnaasn[m]	0	0	0	No Effect
trnaasp[m]	0	0	0	No Effect
trnacys[c]	0	0	0	No Effect
trnagln[c]	0	0	0	No Effect
trnaglu[c]	0	0	0	No Effect
trnaglu[h]	0.0840608	0.0840608	9.71445e-17	No Effect
trnagly[c]	0	0	0	No Effect
trnagly[m]	0	0	0	No Effect
trnahis[c]	0	0	0	No Effect
trnaile[c]	0	0	0	No Effect
trnaleu[c]	0.0934009	0.0934009	8.04912e-16	No Effect
trnalys[m]	0	0	0	No Effect
trnamet[c]	0	0	0	No Effect
trnaphe[m]	0	0	0	No Effect
trnapro[c]	0	0	0	No Effect
trnasecys[m]	0	0	0	No Effect
trnaser[c]	0	0	0	No Effect
trnathr[c]	0	0	0	No Effect
trnathr[m]	0	0	0	No Effect
trnatrp[c]	0.196142	0.196142	9.99201e-16	No Effect
trnatyr[c]	0.158782	0.158782	9.99201e-16	No Effect
trnaval[c]	0.0747207	0.0747207	4.996e-16	No Effect
trnaval[h]	0.0747207	0.0747207	4.996e-16	No Effect
trp-L[c]	-0.196142	-0.196142	9.99201e-16	No Effect
trp-L[h]	-0.196142	-0.196142	9.99201e-16	No Effect
trptrna[c]	0	0	0	No Effect
tsul[c]	-0.00934009	-0.00934009	3.40006e-16	No Effect
tsul[e]	-0.00934009	-0.00934009	3.40006e-16	No Effect
tsul[h]	-0.0186802	-0.0186802	9.71445e-17	No Effect
tsul[m]	0	0	0	No Effect
ttc-ggdp[c]	-0.513705	-0.513705	0	No Effect
ttdca[h]	-0.177462	-0.308223	0.130761	Change
tyr-L[c]	-0.158782	-0.158782	0	No Effect
tyr-L[h]	-0.158782	-0.158782	9.99201e-16	No Effect
tyr-L[m]	-0.158782	-0.158782	9.99201e-16	No Effect
tyr-Lso4[c]	-0.158782	-0.158782	0	No Effect
tyrtrna[c]	0	0	0	No Effect
uacgam[c]	-0.289543	-0.289543	9.99201e-16	No Effect
udg[m]	0	0	0	No Effect
udp[c]	-0.158782	-0.158782	9.99201e-16	No Effect
udp[g]	-0.158782	-0.158782	9.99201e-16	No Effect
udp[h]	-0.158782	-0.158782	9.99201e-16	No Effect
udp[m]	-0.158782	-0.158782	9.99201e-16	No Effect
udp[n]	-0.158782	-0.158782	9.99201e-16	No Effect
udparab[c]	-0.261523	-0.261523	0	No Effect
udparab[g]	-0.261523	-0.261523	0	No Effect
udpg[c]	-0.261523	-0.261523	0	No Effect
udpg[h]	-0.261523	-0.261523	0	No Effect
udpg[n]	-0.270863	-0.270863	0	No Effect
udpgal[c]	-0.261523	-0.261523	0	No Effect
udpgal[g]	-0.261523	-0.261523	0	No Effect
udpgal[h]	-0.261523	-0.261523	0	No Effect
udpgalur[c]	-0.261523	-0.261523	0	No Effect
udpglcur[c]	-0.261523	-0.261523	0	No Effect
udpsq[h]	-0.261523	-0.261523	0	No Effect
udpxyl[c]	-0.261523	-0.261523	0	No Effect
ump[c]	-0.149441	-0.149441	0	No Effect
ump[h]	-0.149441	-0.149441	0	No Effect
upp1[h]	-0.756547	-0.756547	0	No Effect
upp3[h]	-0.737867	-0.737867	0	No Effect
uppg1[h]	-0.747207	-0.747207	0	No Effect
uppg3[h]	-0.747207	-0.747207	0	No Effect
ura[c]	-0.0467004	-0.0467004	9.71445e-17	No Effect
urate[c]	-0.112081	-0.112081	1.9984e-15	No Effect
urate[e]	-0.112081	-0.112081	1.9984e-15	No Effect
urate[m]	-0.112081	-0.112081	1.9984e-15	No Effect
urcan[c]	-0.0840608	-0.0840608	4.02456e-16	No Effect
urdglyc[m]	0	-5.69113e-17	5.69113e-17	No Effect
urea[c]	2.55645e-33	8.5367e-17	8.5367e-17	No Effect
urea[e]	1.24276e-33	5.69113e-17	5.69113e-17	No Effect
urea[m]	2.57474e-33	8.5367e-17	8.5367e-17	No Effect
uri[c]	-0.149441	-0.149441	0	No Effect
utp[c]	-0.158782	-0.158782	9.99201e-16	No Effect
utp[m]	-0.158782	-0.158782	9.99201e-16	No Effect
val-L[c]	-0.0747207	-0.0747207	4.996e-16	No Effect
val-L[h]	-0.0747207	-0.0747207	5.96745e-16	No Effect
val-L[m]	-0.0747207	-0.0747207	4.996e-16	No Effect
valtrna[c]	0	0	0	No Effect
valtrna[h]	0	0	0	No Effect
vioxan[u]	-0.99005	-0.99005	9.99201e-16	No Effect
vitd3[c]	0.00467004	0.00467004	2.2031e-16	No Effect
whddca[h]	-0.140101	-0.270863	0.130761	Change
whhdca[h]	-0.233502	-0.233502	3.9968e-15	No Effect
whlnlc[h]	-0.280203	-0.280203	3.9968e-15	No Effect
whodce9a[h]	-0.280203	-0.280203	2.9976e-15	No Effect
whttdca[h]	-0.186802	-0.317563	0.130761	Change
xan[c]	-0.112081	-0.112081	1.9984e-15	No Effect
xmp[c]	-0.214822	-0.214822	9.99201e-16	No Effect
xmp[m]	-0.214822	-0.214822	9.99201e-16	No Effect
xtp[c]	-0.224162	-0.224162	1.9984e-15	No Effect
xtsn[c]	-0.205482	-0.214822	0.00934009	Change
xu5p-D[h]	-0.102741	-0.102741	0	No Effect
yvite[h]	-0.691167	-0.691167	9.99201e-16	No Effect
zaxan[u]	-0.99005	-0.99005	9.99201e-16	No Effect
zcaro[h]	0.971369	0.971369	1.9984e-15	No Effect
zxan[u]	-0.980709	-0.980709	1.9984e-15	No Effect
zymst[c]	0.00467004	0.00467004	3.40006e-16	No Effect
zymstnl[c]	0.00467004	0.00467004	1.50054e-16	No Effect

## Sheet: ST4
Shadow Prices for Biomass Objective Function (Maximum value 0.1533) At Dark with acetate
Metabolites	iRC1080	iBD1093	Difference	if (Differnce >=0.001,"Change","No Effect"
10fthf[c]	-0.0081164	-0.0081164	1.51094e-15	No Effect
10fthf[h]	-0.0081164	-0.0081164	2.45116e-15	No Effect
10fthf[m]	-0.0081164	-0.0081164	1.71044e-15	No Effect
10fthf[x]	-0.0081164	-0.0081164	1.51094e-15	No Effect
10fthfglu-L[c]	-0.0730476	-0.0730476	1.94289e-16	No Effect
10fthfglu-L[m]	-0.0568148	-0.0568148	9.71445e-17	No Effect
12dgr160[h]	-0.551915	-0.551915	3.09752e-14	No Effect
12dgr16018111Z[c]	-0.576264	-0.576264	2.40918e-14	No Effect
12dgr1601819Z[c]	-0.324656	-0.324656	2.90323e-14	No Effect
12dgr1601819Z[h]	-0.584381	-0.584381	3.29736e-14	No Effect
12dgr1801819Z[c]	-0.357122	-0.357122	3.10307e-14	No Effect
12dgr1801819Z[h]	-0.560031	-0.616846	0.0568148	Change
12dgr18111Z160[h]	-0.722359	-0.722359	2.59792e-14	No Effect
12dgr18111Z18111Z[c]	-0.860338	-0.860338	2.19824e-14	No Effect
12dgr18111Z1819Z[c]	-0.60873	-0.60873	2.69784e-14	No Effect
12dgr18111Z1819Z[h]	-0.754825	-0.754825	2.9976e-14	No Effect
12dgr1819Z160[h]	-0.584381	-0.584381	3.29736e-14	No Effect
12dgr1819Z1619Z[h]	-0.641195	-0.641195	2.89768e-14	No Effect
12dgr1819Z18111Z[c]	-0.60873	-0.60873	2.69784e-14	No Effect
12dgr1819Z18111Z[h]	-0.754825	-0.754825	2.9976e-14	No Effect
12dgr1819Z1819Z[c]	-0.357122	-0.357122	3.20299e-14	No Effect
12dgr1819Z1819Z[h]	-0.616846	-0.616846	3.60822e-14	No Effect
12dmpo[c]	-0.121746	-0.121746	1.9984e-15	No Effect
13dampp[h]	-0.0649312	-0.0649312	7.07767e-16	No Effect
13dpg[c]	-0.0486984	-0.0486984	9.71445e-17	No Effect
13dpg[f]	0.0162328	0.0162328	1.19696e-15	No Effect
13dpg[h]	-0.162328	-0.162328	2.9976e-15	No Effect
13dpg[m]	-0.0324656	-0.0324656	7.00828e-16	No Effect
13oocdcy1829Z11Ea[c]	-0.162328	-0.162328	1.6015e-14	No Effect
13Shocdcy1829Z11Ea[c]	-0.162328	-0.162328	1.50158e-14	No Effect
13Shpocdcy1829Z11Ea[c]	-0.162328	-0.162328	1.40166e-14	No Effect
1acpc[c]	-0.0649312	-0.0649312	9.99201e-16	No Effect
1acpc[h]	-0.0649312	-0.0649312	9.99201e-16	No Effect
1acpc[m]	-0.0649312	-0.0649312	9.99201e-16	No Effect
1agpe180[c]	-0.243492	-0.243492	1.50158e-14	No Effect
1agpe18111Z[c]	-0.4951	-0.4951	1.19904e-14	No Effect
1agpe1819Z[c]	-0.243492	-0.243492	1.6015e-14	No Effect
1agpe1829Z12Z[c]	-0.243492	-0.243492	1.50158e-14	No Effect
1btol[c]	0	0	0	No Effect
1Dgali[c]	-0.178561	-0.178561	4.996e-15	No Effect
1Dgali[h]	-0.081164	-0.081164	2.20657e-15	No Effect
1hdecg3p[c]	-0.162328	-0.162328	1.30174e-14	No Effect
1hdecg3p[h]	-0.373354	-0.373354	1.60427e-14	No Effect
1odec11eg3p[c]	-0.446402	-0.446402	1.09912e-14	No Effect
1odec11eg3p[h]	-0.543799	-0.543799	1.11022e-14	No Effect
1odec9eg3p[c]	-0.194794	-0.194794	1.50158e-14	No Effect
1odec9eg3p[h]	-0.40582	-0.40582	1.90403e-14	No Effect
1odecg3p[c]	-0.194794	-0.194794	1.50158e-14	No Effect
1odecg3p[h]	-0.349005	-0.40582	0.0568148	Change
1pyr5c[c]	-0.0649312	-0.0649312	9.99201e-16	No Effect
1pyr5c[m]	-0.0649312	-0.0649312	1.80411e-15	No Effect
23dhdp[c]	-0.0649312	-0.0649312	3.05311e-16	No Effect
23dhmb[c]	-0.0324656	-0.0324656	2.69923e-15	No Effect
23dhmb[h]	-0.0324656	-0.0324656	2.69923e-15	No Effect
23dhmb[m]	-0.0324656	-0.0324656	2.69923e-15	No Effect
23dhmp[c]	-0.162328	-0.162328	9.99201e-16	No Effect
23dhmp[h]	-0.162328	-0.162328	9.99201e-16	No Effect
25aics[c]	-0.300307	-0.300307	3.9968e-15	No Effect
25aics[h]	-0.219143	-0.219143	4.996e-15	No Effect
25dhpp[h]	0.11363	0.11363	1.9984e-15	No Effect
25hvitd3[c]	8.93899e-16	1.98467e-16	6.95432e-16	No Effect
26dap-LL[c]	-0.0649312	-0.0649312	5.96745e-16	No Effect
26dap-M[c]	-0.0649312	-0.0649312	4.996e-16	No Effect
26dmani[e]	1.03792e-15	1.2326e-32	1.03792e-15	No Effect
2ahbut[h]	-0.146095	-0.146095	9.99201e-16	No Effect
2ahethmpp[h]	0	0	0	No Effect
2ahethmpp[m]	0	0	0	No Effect
2ahhmd[c]	-0.0162328	-0.0162328	4.996e-16	No Effect
2ahhmp[c]	0	0	0	No Effect
2aobut[x]	-0.0243492	-0.0243492	1.80064e-15	No Effect
2cpr5p[h]	-0.389587	-0.389587	4.996e-15	No Effect
2dda7p[h]	-0.162328	-0.162328	2.9976e-15	No Effect
2dhp[c]	-0.040582	-0.040582	3.59435e-15	No Effect
2dhp[m]	-0.040582	-0.040582	3.59435e-15	No Effect
2dhp[n]	-0.040582	-0.040582	3.59435e-15	No Effect
2dr5p[c]	-0.0162328	-0.0162328	9.99201e-16	No Effect
2h34hppr[c]	-0.211026	-0.211026	3.9968e-15	No Effect
2h3kmtp[c]	-0.121746	-0.121746	1.9984e-15	No Effect
2h3oppan[m]	-0.0243492	-0.0243492	2.01228e-16	No Effect
2ippm[c]	-0.0324656	-0.0324656	4.19803e-15	No Effect
2kmb[c]	-0.121746	-0.121746	1.9984e-15	No Effect
2maacoa[m]	-0.503217	-0.503217	9.99201e-16	No Effect
2mb2coa[m]	-0.503217	-0.503217	9.99201e-16	No Effect
2mbcoa[m]	-0.616846	-0.616846	9.99201e-16	No Effect
2mbdhl[m]	0	0	0	No Effect
2me4p[h]	-0.211026	-0.211026	2.9976e-15	No Effect
2mecdp[h]	-0.29219	-0.29219	3.9968e-15	No Effect
2mhob[m]	-0.146095	-0.146095	9.99201e-16	No Effect
2mhop[m]	-0.0162328	-0.0162328	1.70003e-15	No Effect
2mp2coa[m]	-0.486984	-0.486984	0	No Effect
2mpdhl[m]	0.129862	0.129862	1.9984e-15	No Effect
2obut[h]	-0.0649312	-0.0649312	4.02456e-16	No Effect
2obut[m]	-0.0649312	-0.0649312	9.02056e-16	No Effect
2pg[c]	-0.0324656	-0.0324656	4.996e-16	No Effect
2pg[f]	0	0	0	No Effect
2pg[h]	-0.0324656	-0.0324656	4.996e-16	No Effect
2pg[m]	-0.0324656	-0.0324656	4.996e-16	No Effect
2pglyc[c]	-0.0892804	-0.0892804	0	No Effect
2pglyc[h]	-0.0892804	-0.0892804	0	No Effect
2pglyc[x]	-0.0892804	-0.0892804	0	No Effect
34hpp[c]	-0.211026	-0.211026	3.9968e-15	No Effect
34hpp[h]	-0.194794	-0.194794	3.9968e-15	No Effect
34hpp[m]	-0.211026	-0.211026	3.9968e-15	No Effect
35cgmp[c]	-0.284074	-0.284074	5.9952e-15	No Effect
35cgmp[n]	-0.284074	-0.284074	5.9952e-15	No Effect
3c2hmp[c]	-0.0324656	-0.0324656	4.19803e-15	No Effect
3c3hmp[c]	-0.0324656	-0.0324656	4.19803e-15	No Effect
3c3hmp[h]	-0.0324656	-0.0324656	4.19803e-15	No Effect
3c4mop[c]	-0.0324656	-0.0324656	4.50334e-15	No Effect
3dhq[h]	-0.0973968	-0.0973968	2.40086e-15	No Effect
3dhsk[h]	-0.0973968	-0.0973968	2.498e-15	No Effect
3dsphgn[c]	-0.146095	-0.146095	1.40166e-14	No Effect
3hbcoa[c]	-0.486984	-0.486984	1.9984e-15	No Effect
3hbcoa[m]	0	0	0	No Effect
3hbcoa[x]	-0.486984	-0.486984	9.99201e-16	No Effect
3hbcoa-R[c]	-0.486984	-0.486984	1.9984e-15	No Effect
3hbutACP[h]	0.129862	0.243492	0.11363	Change
3hcvac11eACP[h]	-0.154212	-0.040582	0.11363	Change
3hdcoa[m]	-0.535682	-0.535682	5.9952e-15	No Effect
3hdcoa[x]	-0.535682	-0.535682	7.99361e-15	No Effect
3hddcoa[m]	-0.551915	-0.551915	7.99361e-15	No Effect
3hddcoa[x]	-0.551915	-0.568148	0.0162328	Change
3hddecACP[h]	-0.324656	-0.211026	0.11363	Change
3hdecACP[h]	-0.211026	-0.0973968	0.11363	Change
3hhcoa[m]	-0.503217	-0.503217	2.9976e-15	No Effect
3hhcoa[x]	-0.503217	-0.503217	3.9968e-15	No Effect
3hhdcoa[m]	-0.584381	-0.584381	1.09912e-14	No Effect
3hhdcoa[x]	-0.600613	-0.600613	9.99201e-15	No Effect
3hhexACP[h]	0.0162328	0.129862	0.11363	Change
3hib[m]	-0.0324656	-0.0324656	1.20043e-15	No Effect
3hibutcoa[m]	-0.486984	-0.486984	0	No Effect
3hivcoa[m]	-0.470751	-0.470751	0	No Effect
3hlido[c]	1.44019e-16	-1.98467e-16	3.42486e-16	No Effect
3hmbcoa[m]	-0.503217	-0.503217	9.99201e-16	No Effect
3hmoa[h]	-0.0973968	-0.0162328	0.081164	Change
3hmop[h]	-0.146095	-0.146095	9.99201e-16	No Effect
3hmrsACP[h]	-0.438285	-0.324656	0.11363	Change
3hocoa[m]	-0.519449	-0.519449	3.9968e-15	No Effect
3hocoa[x]	-0.519449	-0.519449	5.9952e-15	No Effect
3hoctaACP[h]	-0.0973968	0.0973968	0.194794	Change
3hoctACP[h]	-0.0973968	0.0162328	0.11363	Change
3hodcoa[c]	-0.616846	-0.616846	1.19904e-14	No Effect
3hpalmACP[h]	-0.551915	-0.438285	0.11363	Change
3hpcoa[c]	-0.486984	-0.486984	9.99201e-16	No Effect
3hpcoa[m]	-0.486984	-0.486984	1.9984e-15	No Effect
3hpp[c]	-0.0324656	-0.0324656	7.97973e-16	No Effect
3htdcoa[m]	-0.568148	-0.568148	9.99201e-15	No Effect
3htdcoa[x]	-0.568148	-0.584381	0.0162328	Change
3ig3p[h]	-0.454518	-0.454518	5.9952e-15	No Effect
3mb2coa[m]	-0.470751	-0.470751	0	No Effect
3mbdhl[m]	0.129862	0.129862	4.996e-15	No Effect
3mgcoa[m]	-0.470751	-0.470751	0	No Effect
3mhtpp[m]	-0.0162328	-0.0162328	3.89966e-15	No Effect
3mob[c]	-0.0162328	-0.0162328	3.29944e-15	No Effect
3mob[h]	-0.0162328	-0.0162328	3.29944e-15	No Effect
3mob[m]	-0.0324656	-0.0324656	2.90046e-15	No Effect
3mop[c]	-0.162328	-0.162328	9.99201e-16	No Effect
3mop[h]	-0.146095	-0.146095	9.99201e-16	No Effect
3mop[m]	-0.162328	-0.162328	9.99201e-16	No Effect
3mtpa[c]	-0.121746	-0.121746	2.9976e-15	No Effect
3ocvac11eACP[h]	-0.137979	-0.0243492	0.11363	Change
3odcoa[m]	-0.535682	-0.535682	5.9952e-15	No Effect
3odcoa[x]	-0.535682	-0.535682	8.99281e-15	No Effect
3oddcoa[m]	-0.551915	-0.551915	7.99361e-15	No Effect
3oddcoa[x]	-0.551915	-0.568148	0.0162328	Change
3oddecACP[h]	-0.308423	-0.194794	0.11363	Change
3odecACP[h]	-0.194794	-0.081164	0.11363	Change
3ohcoa[m]	-0.503217	-0.503217	2.9976e-15	No Effect
3ohcoa[x]	-0.503217	-0.503217	3.9968e-15	No Effect
3ohdcoa[m]	-0.584381	-0.584381	1.09912e-14	No Effect
3ohdcoa[x]	-0.600613	-0.600613	9.99201e-15	No Effect
3ohexACP[h]	0.0324656	0.146095	0.11363	Change
3omrsACP[h]	-0.422053	-0.308423	0.11363	Change
3oocoa[m]	-0.519449	-0.519449	3.9968e-15	No Effect
3oocoa[x]	-0.519449	-0.519449	5.9952e-15	No Effect
3ooctACP[h]	-0.081164	0.0324656	0.11363	Change
3ooctdACP[h]	-0.081164	0.0324656	0.11363	Change
3oodcoa[c]	-0.616846	-0.616846	1.19904e-14	No Effect
3opalmACP[h]	-0.535682	-0.422053	0.11363	Change
3opcoa[c]	-0.486984	-0.486984	0	No Effect
3otdcoa[m]	-0.568148	-0.568148	8.99281e-15	No Effect
3otdcoa[x]	-0.568148	-0.584381	0.0162328	Change
3pg[c]	-0.0324656	-0.0324656	4.996e-16	No Effect
3pg[f]	0	0	0	No Effect
3pg[h]	-0.0973968	-0.0973968	1.40166e-15	No Effect
3pg[m]	-0.0324656	-0.0324656	4.996e-16	No Effect
3pg[x]	-0.0324656	-0.0324656	4.996e-16	No Effect
3php[h]	-0.081164	-0.081164	2.10942e-15	No Effect
3psme[h]	-0.211026	-0.211026	3.9968e-15	No Effect
3sala[h]	-0.0324656	-0.0324656	4.02456e-16	No Effect
3sala[m]	-0.0162328	-0.0162328	7.00828e-16	No Effect
3snpyr[h]	-0.0162328	-0.0162328	8.01442e-16	No Effect
3snpyr[m]	-0.0162328	-0.0162328	1.20043e-15	No Effect
3spyr[h]	0.0162328	0.0162328	1.20043e-15	No Effect
3spyr[m]	-4.71845e-16	4.16334e-17	5.13478e-16	No Effect
44mctr[c]	-1.85054	-1.85054	2.9976e-14	No Effect
44mzym[c]	-1.85054	-1.85054	2.9976e-14	No Effect
4abut[c]	0.178561	-0.0486984	0.227259	Change
4abut[h]	0.178561	-0.0486984	0.227259	Change
4abut[m]	0.178561	-0.0486984	0.227259	Change
4abutn[h]	0.227259	0.227259	1.9984e-15	No Effect
4abutn[m]	-0.0649312	-0.0649312	9.02056e-16	No Effect
4abz[c]	0	0	0	No Effect
4adcho[c]	-0.0162328	-0.0162328	1.79717e-15	No Effect
4c2me[h]	-0.40582	-0.40582	4.996e-15	No Effect
4fumacac[c]	-0.0324656	-0.0324656	1.09635e-15	No Effect
4fumacac[n]	0	0	0	No Effect
4hproara[g]	-0.162328	-0.162328	5.9952e-15	No Effect
4hproaraara[g]	-0.243492	-0.243492	8.02136e-15	No Effect
4hproaraaraara[g]	-0.324656	-0.324656	1.19904e-14	No Effect
4hproaraaraaragal[g]	-0.40582	-0.40582	1.39888e-14	No Effect
4hproaraaragal[g]	-0.324656	-0.324656	1.19904e-14	No Effect
4hproaraaragalara[g]	-0.40582	-0.40582	1.39888e-14	No Effect
4hproaraaragalmeara[g]	-0.413936	-0.413936	1.4988e-14	No Effect
4hproaraara-LPAREN-ara-RPAREN-gal[g]	-0.40582	-0.40582	1.39888e-14	No Effect
4hproaraara-LPAREN-gal-RPAREN-gal[g]	-0.40582	-0.40582	1.39888e-14	No Effect
4hproaraara-LPAREN-gal-RPAREN-megal[g]	-0.413936	-0.413936	1.39888e-14	No Effect
4hproaraaramegal[g]	-0.332772	-0.332772	1.19904e-14	No Effect
4hproaragal[g]	-0.243492	-0.243492	8.02136e-15	No Effect
4hproara-LPAREN-aragalara-RPAREN-gal[g]	0	0	0	No Effect
4hproara-LPAREN-aragal-RPAREN-gal[g]	0	0	0	No Effect
4hproara-LPAREN-aragal-RPAREN-galara[g]	0	0	0	No Effect
4hproara-LPAREN-ara-RPAREN-gal[g]	-0.324656	-0.324656	1.19904e-14	No Effect
4hproara-LPAREN-ara-RPAREN-galara[g]	-0.40582	-0.40582	1.39888e-14	No Effect
4hproara-LPAREN-ara-RPAREN-galaragal[g]	-0.486984	-0.486984	1.70419e-14	No Effect
4hprogal[g]	-0.162328	-0.162328	4.996e-15	No Effect
4hpro-LT[c]	-0.081164	-0.081164	2.30371e-15	No Effect
4hpro-LT[g]	-0.081164	-0.081164	2.30371e-15	No Effect
4izp[c]	-0.0486984	-0.0486984	2.60209e-15	No Effect
4mlacac[c]	-0.211026	-0.211026	4.996e-15	No Effect
4mlacac[n]	0	0	0	No Effect
4mop[c]	-0.0324656	-0.0324656	5.10009e-15	No Effect
4mop[h]	-0.0162328	-0.0162328	5.80092e-15	No Effect
4mop[m]	-0.0324656	-0.0324656	5.10009e-15	No Effect
4mzym[c]	-1.85054	-1.85054	2.9976e-14	No Effect
4mzym-int1[c]	-1.85054	-1.85054	1.9984e-14	No Effect
4mzym-int2[c]	-1.85054	-1.85054	1.9984e-14	No Effect
4ogm[c]	-0.0486984	-0.0486984	9.99201e-16	No Effect
4pasp[h]	-0.0973968	-0.0973968	6.93889e-16	No Effect
4pcys[c]	-0.137979	-0.137979	3.9968e-15	No Effect
4ppan[c]	-0.0892804	-0.0892804	4.30211e-15	No Effect
4ppcys[c]	-0.154212	-0.154212	3.9968e-15	No Effect
4pyrdx[c]	0.0162328	9.17735e-17	0.0162328	Change
4r5au[h]	0.162328	0.162328	2.9976e-15	No Effect
56dh5flura[c]	-1.30756e-15	-3.96934e-16	9.10621e-16	No Effect
56dura[c]	-0.0324656	-0.0324656	7.97973e-16	No Effect
5aizc[c]	-0.251608	-0.251608	3.9968e-15	No Effect
5aizc[h]	-0.186677	-0.186677	3.9968e-15	No Effect
5aop[h]	-0.194794	-0.194794	1.9984e-15	No Effect
5aprbu[h]	0.0973968	0.0973968	2.20657e-15	No Effect
5apru[h]	0.11363	0.11363	9.99201e-16	No Effect
5flura[c]	-1.5296e-15	-2.304e-16	1.2992e-15	No Effect
5flura[e]	-1.5296e-15	-2.304e-16	1.2992e-15	No Effect
5flurimp[c]	-0.146095	-0.146095	2.9976e-15	No Effect
5forthf[c]	-0.0081164	-0.0081164	3.50935e-15	No Effect
5fthf[c]	-0.0081164	-0.0081164	1.98973e-15	No Effect
5fthf[e]	-0.0081164	-0.0081164	1.4086e-15	No Effect
5fthf[m]	-0.0081164	-0.0081164	1.71911e-15	No Effect
5hiu[m]	-0.137979	-0.137979	5.9952e-15	No Effect
5houdic[m]	2.8594e-16	-0.137979	0.137979	Change
5mdr1p[c]	-0.121746	-0.121746	1.9984e-15	No Effect
5mdru1p[c]	-0.121746	-0.121746	1.9984e-15	No Effect
5mta[c]	-0.259725	-0.259725	9.99201e-15	No Effect
5mta[h]	-0.259725	-0.259725	9.99201e-15	No Effect
5mta[m]	-0.259725	-0.259725	9.99201e-15	No Effect
5mthf[m]	0	0	0	No Effect
5mtr[c]	-0.121746	-0.121746	1.9984e-15	No Effect
5prdmbz[c]	6.16343e-16	3.19335e-17	5.84409e-16	No Effect
6mpur[c]	0.146095	0.146095	2.9976e-15	No Effect
6mpur[e]	0.146095	0.146095	2.9976e-15	No Effect
6pgc[c]	0.081164	0.0649312	0.0162328	Change
6pgc[h]	-0.0973968	-0.0973968	4.996e-16	No Effect
6pgl[c]	-0.0973968	-0.0973968	1.19349e-15	No Effect
6pgl[h]	-0.0973968	-0.0973968	1.19349e-15	No Effect
6tgsnmp[c]	0	0	0	No Effect
6tins5mp[c]	2.16325e-16	-1.98467e-16	4.14791e-16	No Effect
6txan5mp[c]	0	0	0	No Effect
7dhchsterol[c]	0	0	0	No Effect
aacoa[c]	-0.486984	-0.486984	9.99201e-16	No Effect
aacoa[m]	8.88731e-17	1.19666e-16	3.0793e-17	No Effect
aacoa[x]	-0.486984	-0.486984	1.9984e-15	No Effect
aact[x]	-0.0243492	-0.0243492	1.9984e-15	No Effect
ac[c]	-0.0162328	-0.0162328	9.99201e-16	No Effect
ac[e]	-0.0162328	-0.0162328	9.99201e-16	No Effect
ac[h]	-0.0162328	-0.0162328	9.99201e-16	No Effect
ac[m]	-0.0162328	-0.0162328	9.99201e-16	No Effect
ac[s]	-0.0162328	-0.0162328	9.99201e-16	No Effect
acac[c]	8.88731e-17	9.5592e-17	6.71886e-18	No Effect
acac[m]	8.88731e-17	9.5592e-17	6.71886e-18	No Effect
acac[x]	8.88731e-17	9.5592e-17	6.71886e-18	No Effect
acACP[h]	0.227259	0.340889	0.11363	Change
acald[c]	-0.0162328	-0.0162328	1.09981e-15	No Effect
acald[h]	-0.0568148	-0.0568148	9.99201e-16	No Effect
acald[m]	-0.0162328	-0.0162328	1.4988e-15	No Effect
acald[x]	-0.0162328	-0.0162328	1.09981e-15	No Effect
acaro[h]	-2.46739	-2.46739	3.01981e-14	No Effect
acaro[u]	-2.46739	-2.46739	3.01981e-14	No Effect
accoa[c]	-0.470751	-0.470751	0	No Effect
accoa[h]	-0.470751	-0.470751	0	No Effect
accoa[m]	-0.470751	-0.470751	0	No Effect
accoa[s]	-0.470751	-0.470751	0	No Effect
accoa[x]	-0.470751	-0.470751	0	No Effect
acg5p[c]	-0.081164	-0.081164	1.80411e-15	No Effect
acg5sa[c]	-0.081164	-0.081164	2.70617e-15	No Effect
acg5sa[m]	-4.71845e-16	4.16334e-17	5.13478e-16	No Effect
acgam1p[c]	-0.11363	-0.11363	1.9984e-15	No Effect
acgam6p[c]	-0.11363	-0.11363	1.9984e-15	No Effect
acglu[c]	-0.0649312	-0.0649312	2.19269e-15	No Effect
achms[c]	0.0162328	0.0162328	7.00828e-16	No Effect
achms[h]	-0.081164	-0.081164	5.96745e-16	No Effect
acorn[c]	-0.081164	-0.081164	2.09555e-15	No Effect
acorn[m]	0	0	0	No Effect
ACP[c]	-0.170444	-0.170444	5.9952e-15	No Effect
ACP[h]	0.243492	0.357122	0.11363	Change
acser[c]	-0.0162328	-0.0162328	2.498e-15	No Effect
acser[h]	-0.0324656	-0.0324656	2.19963e-15	No Effect
acser[m]	-0.0324656	-0.0324656	2.39392e-15	No Effect
actACP[h]	0.146095	0.259725	0.11363	Change
actp[h]	-0.081164	-0.081164	2.01228e-15	No Effect
actp[m]	-0.0162328	-0.0162328	1.19696e-15	No Effect
ad[c]	-0.0162328	-0.0162328	9.99201e-16	No Effect
ad[e]	-0.0162328	-0.0162328	9.99201e-16	No Effect
ade[c]	-0.137979	-0.137979	8.99281e-15	No Effect
ade[e]	-0.137979	-0.137979	8.99281e-15	No Effect
adhlam[h]	-0.0162328	-0.0162328	1.4988e-15	No Effect
adhlam[m]	0.146095	0.146095	9.99201e-16	No Effect
adn[c]	-0.284074	-0.284074	5.9952e-15	No Effect
adn[m]	-0.284074	-0.284074	5.9952e-15	No Effect
adp[c]	-0.284074	-0.284074	5.9952e-15	No Effect
adp[f]	0	0	0	No Effect
adp[h]	-0.349005	-0.349005	5.9952e-15	No Effect
adp[m]	-0.284074	-0.284074	5.9952e-15	No Effect
adp[n]	0	0	0	No Effect
adpglc[h]	-0.349005	-0.349005	4.996e-15	No Effect
adprib[c]	-0.430169	-0.430169	3.9968e-15	No Effect
aflbala[c]	-3.15658e-15	-4.92734e-16	2.66385e-15	No Effect
aflburppa[c]	-1.9239e-15	-4.28867e-16	1.49503e-15	No Effect
agm[m]	-0.0649312	-0.0649312	4.996e-16	No Effect
agm[n]	6.16343e-16	3.19335e-17	5.84409e-16	No Effect
ahcys[c]	-0.397704	-0.397704	7.99361e-15	No Effect
ahcys[g]	-0.397704	-0.397704	7.99361e-15	No Effect
ahcys[h]	0	0	0	No Effect
ahcys[m]	-0.397704	-0.397704	7.99361e-15	No Effect
ahcys[n]	-0.397704	-0.397704	7.99361e-15	No Effect
ahdt[c]	-0.300307	-0.300307	6.99441e-15	No Effect
aicar[c]	-0.267841	-0.267841	4.996e-15	No Effect
aicar[h]	0.259725	0.259725	9.99201e-16	No Effect
air[c]	-0.251608	-0.251608	2.9976e-15	No Effect
air[h]	-0.251608	-0.251608	2.9976e-15	No Effect
akg[c]	-0.0486984	-0.0486984	1.70003e-15	No Effect
akg[h]	-0.0486984	-0.0486984	1.59595e-15	No Effect
akg[m]	-0.0486984	-0.0486984	1.90126e-15	No Effect
ala-B[c]	-0.0324656	-0.0324656	1.9984e-15	No Effect
ala-B[h]	-0.0324656	-0.0324656	1.9984e-15	No Effect
ala-B[m]	-0.0324656	-0.0324656	1.9984e-15	No Effect
alac-S[h]	-0.0973968	-0.0162328	0.081164	Change
alac-S[m]	-0.0324656	-0.0324656	2.69923e-15	No Effect
ala-L[c]	-0.0162328	-0.0162328	6.97359e-16	No Effect
ala-L[m]	-0.0162328	-0.0162328	6.97359e-16	No Effect
ala-L[x]	-0.0162328	-0.0162328	1.09981e-15	No Effect
alatrna[m]	-0.0162328	-0.0162328	1.50227e-15	No Effect
allphn[c]	-0.0162328	-0.0162328	2.498e-15	No Effect
allphn[m]	1.51271e-15	1.41816e-16	1.37089e-15	No Effect
alltn[c]	5.59848e-16	6.38669e-17	4.95981e-16	No Effect
alltn[e]	5.59848e-16	6.38669e-17	4.95981e-16	No Effect
alltn[m]	6.28374e-16	9.58004e-17	5.32574e-16	No Effect
alltt[c]	4.85404e-16	6.38669e-17	4.21537e-16	No Effect
alltt[e]	4.85404e-16	6.38669e-17	4.21537e-16	No Effect
alltt[m]	4.85404e-16	6.38669e-17	4.21537e-16	No Effect
alpro[m]	0	0	0	No Effect
amet[c]	-0.40582	-0.40582	7.99361e-15	No Effect
amet[g]	-0.40582	-0.40582	7.99361e-15	No Effect
amet[h]	-0.0081164	-0.0081164	1.08073e-15	No Effect
amet[m]	-0.40582	-0.40582	6.99441e-15	No Effect
amet[n]	-0.40582	-0.40582	7.99361e-15	No Effect
ametam[c]	-0.40582	-0.40582	6.99441e-15	No Effect
ametam[h]	-0.40582	-0.40582	6.99441e-15	No Effect
ametam[m]	-0.40582	-0.40582	6.99441e-15	No Effect
amp[c]	-0.284074	-0.284074	5.9952e-15	No Effect
amp[h]	-0.284074	-0.284074	5.9952e-15	No Effect
amp[m]	-0.284074	-0.284074	5.9952e-15	No Effect
amp[n]	-0.284074	-0.284074	5.9952e-15	No Effect
ans[c]	-0.0324656	-0.0324656	1.9984e-15	No Effect
anth[h]	-0.129862	-0.129862	0	No Effect
anxan[u]	-2.49985	-2.49985	3.01981e-14	No Effect
ap4a[n]	0	0	0	No Effect
apoACP[c]	0	0	0	No Effect
apoACP[h]	0.365238	0.478867	0.11363	Change
apocytc[h]	1.86677	1.86677	3.9968e-14	No Effect
apocytc[m]	1.86677	1.86677	3.9968e-14	No Effect
apofetn[h]	0	-8.11207e-17	8.11207e-17	No Effect
apotfen[h]	0	0	0	No Effect
apppa[n]	-0.284074	-0.284074	5.9952e-15	No Effect
aps[c]	-0.284074	-0.284074	5.9952e-15	No Effect
aps[h]	-0.267841	-0.267841	4.996e-15	No Effect
aps[m]	-0.284074	-0.284074	5.9952e-15	No Effect
aps[n]	-0.284074	-0.284074	5.9952e-15	No Effect
arab-L[c]	-0.081164	-0.081164	3.20577e-15	No Effect
arg-L[c]	-0.0649312	-0.0649312	8.04912e-16	No Effect
arg-L[e]	-0.0649312	-0.0649312	8.04912e-16	No Effect
arg-L[m]	-0.0649312	-0.0649312	8.04912e-16	No Effect
argsuc[c]	-0.0973968	-0.0973968	3.05311e-16	No Effect
argtrna[c]	-0.0649312	-0.0649312	4.02456e-16	No Effect
arso4[c]	0	0	0	No Effect
ascb-L[u]	0	0	0	No Effect
asnglcnacglcnacman-LPAREN-man-LPAREN-manman-RPAREN-manman-RPAREN-manmanman[c]	-0.990201	-0.990201	2.59792e-14	No Effect
asnglcnacglcnacman-LPAREN-man-LPAREN-manman-RPAREN-manman-RPAREN-manmanmanglc[c]	-1.07136	-1.07136	1.9984e-14	No Effect
asnglcnacglcnacman-LPAREN-man-LPAREN-manman-RPAREN-manman-RPAREN-manmanmanglcglc[c]	-1.15253	-1.15253	3.01981e-14	No Effect
asnglcnacglcnacman-LPAREN-man-LPAREN-manman-RPAREN-manman-RPAREN-manmanmanglcglcglc[c]	-1.23369	-1.23369	3.9968e-14	No Effect
asnglcnacglcnacman-LPAREN-man-LPAREN-manman-RPAREN-man-RPAREN-man-LPAREN-man-RPAREN-manman[c]	-0.906331	-0.906331	2.39808e-14	No Effect
asnglcnacglcnacman-LPAREN-man-LPAREN-manman-RPAREN-man-RPAREN-manmanman[c]	-0.825167	-0.825167	2.19824e-14	No Effect
asnglcnacglcnacman-LPAREN-man-LPAREN-man-RPAREN-man-RPAREN-man[c]	-0.330067	-0.330067	8.99281e-15	No Effect
asnglcnacglcnacman-LPAREN-man-RPAREN-man[c]	0	0	0	No Effect
asn-L[c]	-0.0486984	-0.0486984	1.50574e-15	No Effect
asn-L[m]	-0.0486984	-0.0486984	1.60288e-15	No Effect
asn-L[x]	-0.0486984	-0.0486984	1.20043e-15	No Effect
asntrna[m]	-0.0486984	-0.0486984	7.97973e-16	No Effect
Asn-X-Ser-FSLASH-Thr[c]	-0.0486984	-0.0486984	1.50574e-15	No Effect
asp-L[c]	-0.0324656	-0.0324656	2.01228e-16	No Effect
asp-L[h]	-0.0324656	-0.0324656	2.01228e-16	No Effect
asp-L[m]	-0.0324656	-0.0324656	9.71445e-17	No Effect
asp-L[x]	-0.0324656	-0.0324656	2.01228e-16	No Effect
aspsa[c]	-0.0486984	-0.0486984	2.98372e-16	No Effect
aspsa[h]	-0.0486984	-0.0486984	3.95517e-16	No Effect
asptrna[m]	-0.0324656	-0.0324656	6.93889e-16	No Effect
asqdca18111Z160[c]	-0.965851	-0.965851	3.9968e-14	No Effect
asqdca1819Z160[c]	-0.827873	-0.827873	4.69624e-14	No Effect
asqdca1829Z12Z160[c]	-0.827873	-0.827873	4.59632e-14	No Effect
asqdca1839Z12Z15Z160[c]	-0.827873	-0.827873	4.39648e-14	No Effect
asqdpa18111Z160[c]	-0.965851	-0.965851	4.09672e-14	No Effect
asqdpa1819Z160[c]	-0.827873	-0.827873	4.79616e-14	No Effect
asqdpa1829Z12Z160[c]	-0.827873	-0.827873	4.69624e-14	No Effect
asqdpa1839Z12Z15Z160[c]	-0.827873	-0.827873	4.4964e-14	No Effect
atp[c]	-0.300307	-0.300307	6.99441e-15	No Effect
atp[f]	0.0162328	0.0162328	1.19696e-15	No Effect
atp[h]	-0.413936	-0.413936	4.996e-15	No Effect
atp[m]	-0.284074	-0.284074	5.9952e-15	No Effect
atp[n]	-0.284074	-0.284074	5.9952e-15	No Effect
avite1[h]	0	0	0	No Effect
b2coa[c]	-0.486984	-0.486984	1.9984e-15	No Effect
b2coa[m]	-1.99464e-16	0	1.99464e-16	No Effect
b2coa[x]	-0.486984	-0.486984	9.99201e-16	No Effect
bamppald[h]	-0.0486984	-0.0486984	1.90126e-15	No Effect
B-ara1p[c]	-0.081164	-0.081164	2.70617e-15	No Effect
bathorhodopsin[s]	-1.23369	-1.23369	1.9984e-14	No Effect
bcrptxan[u]	-2.48362	-2.48362	3.01981e-14	No Effect
bhb[m]	0	0	0	No Effect
bhb[x]	3.38252e-16	-3.96028e-17	3.77855e-16	No Effect
bilirub[h]	-1.9317	-1.9317	2.9976e-14	No Effect
biliverd[h]	-1.91547	-1.91547	2.9976e-14	No Effect
btal[c]	-0.0324656	-0.0324656	2.40086e-15	No Effect
btal[h]	0.438285	0.438285	1.9984e-15	No Effect
btcoa[c]	-0.486984	-0.486984	9.99201e-16	No Effect
btcoa[h]	0	0	0	No Effect
btcoa[m]	-0.486984	-0.486984	9.99201e-16	No Effect
btcoa[x]	-0.486984	-0.486984	2.9976e-15	No Effect
btnCCP[h]	0	0	0	No Effect
but[c]	-0.0324656	-0.0324656	2.40086e-15	No Effect
but2eACP[h]	0.129862	0.243492	0.11363	Change
butACP[h]	0.11363	0.227259	0.11363	Change
bvite[h]	-1.56646	-1.56646	1.9984e-14	No Effect
ca[c]	-0.162328	-0.162328	1.20182e-14	No Effect
cacoa[c]	-0.616846	-0.616846	8.99281e-15	No Effect
cala[c]	-0.0324656	-0.0324656	7.97973e-16	No Effect
camp[c]	-0.284074	-0.284074	5.9952e-15	No Effect
camp[n]	-0.284074	-0.284074	5.9952e-15	No Effect
carn[h]	-0.211026	-0.211026	9.99201e-16	No Effect
caro[h]	-2.46739	-2.46739	3.01981e-14	No Effect
caro[u]	-2.46739	-2.46739	3.01981e-14	No Effect
cat[c]	0	0	0	No Effect
cbasp[c]	-0.0324656	-0.0324656	9.02056e-16	No Effect
cbasp[m]	-0.0324656	-0.0324656	5.96745e-16	No Effect
cbmp[m]	-0.0649312	-0.0649312	0	No Effect
cbmp[n]	0	0	0	No Effect
cbp[c]	1.20211e-15	-2.09355e-17	1.22304e-15	No Effect
cbp[h]	1.11022e-15	0	1.11022e-15	No Effect
cbp[m]	9.23614e-16	-3.50918e-17	9.58705e-16	No Effect
cbtnCCP[h]	5.26093e-16	-2.51971e-18	5.28613e-16	No Effect
cdp[c]	-0.194794	-0.194794	9.99201e-16	No Effect
cdp[m]	1.66533e-16	0	1.66533e-16	No Effect
cdp12dgr18111Z160[c]	-0.771058	-0.771058	2.69784e-14	No Effect
cdp12dgr18111Z160[h]	-0.982084	-0.982084	2.9976e-14	No Effect
cdp12dgr1819Z160[c]	-0.519449	-0.519449	3.29736e-14	No Effect
cdp12dgr1819Z160[h]	-0.844105	-0.844105	3.70814e-14	No Effect
cdpea[c]	-0.227259	-0.227259	2.9976e-15	No Effect
chla[h]	-3.22221	-3.22221	3.9968e-14	No Effect
chla[u]	-3.22221	-3.22221	3.9968e-14	No Effect
chlaemr[u]	-3.22221	-3.22221	3.9968e-14	No Effect
chlb[u]	-3.22221	-3.22221	3.9968e-14	No Effect
chlda[h]	-1.93982	-1.93982	3.9968e-14	No Effect
chlda[u]	-1.93982	-1.93982	3.9968e-14	No Effect
chldb[h]	-1.93982	-1.93982	3.9968e-14	No Effect
chldb[u]	-1.93982	-1.93982	3.9968e-14	No Effect
chlstol[c]	-1.85054	-1.85054	1.9984e-14	No Effect
chor[c]	-3.1572e-15	-1.8735e-16	2.96985e-15	No Effect
chor[h]	-0.146095	-0.146095	2.9976e-15	No Effect
chsterol[c]	-1.85054	-1.85054	1.9984e-14	No Effect
cit[c]	-0.0486984	-0.0486984	1.20043e-15	No Effect
cit[m]	-0.0486984	-0.0486984	1.4988e-15	No Effect
cit[x]	-0.0486984	-0.0486984	1.20043e-15	No Effect
cital[c]	-3.33067e-16	0	3.33067e-16	No Effect
cital[e]	-3.33067e-16	0	3.33067e-16	No Effect
citalald[c]	0.0243492	0.0243492	1.09981e-15	No Effect
citalo[c]	0	0	0	No Effect
citalppa[c]	0.0243492	0.0243492	9.02056e-16	No Effect
citr-L[c]	-0.0649312	-0.0649312	4.996e-16	No Effect
citr-L[h]	0.0649312	0.0649312	6.93889e-16	No Effect
citr-L[m]	-0.0649312	-0.0649312	4.996e-16	No Effect
cmp[c]	-0.178561	-0.178561	1.9984e-15	No Effect
cmp[h]	-0.178561	-0.178561	1.9984e-15	No Effect
co[c]	-1.16573e-15	0	1.16573e-15	No Effect
co[h]	0	0	0	No Effect
co2[c]	0	0	0	No Effect
co2[e]	0	0	0	No Effect
co2[h]	0.0649312	0.0649312	3.05311e-16	No Effect
co2[m]	0	0	0	No Effect
co2[x]	0	0	0	No Effect
coa[c]	-0.454518	-0.454518	1.9984e-15	No Effect
coa[h]	-0.454518	-0.454518	1.9984e-15	No Effect
coa[m]	-0.454518	-0.454518	9.99201e-16	No Effect
coa[s]	-0.454518	-0.454518	1.9984e-15	No Effect
coa[x]	-0.454518	-0.454518	9.99201e-16	No Effect
cpp1[h]	-1.80184	-1.80184	1.9984e-14	No Effect
cpp3[h]	-1.72068	-1.72068	3.9968e-14	No Effect
cpppg1[h]	-1.81807	-1.81807	1.9984e-14	No Effect
cpppg3[h]	-1.81807	-1.81807	2.9976e-14	No Effect
crpxan[u]	-2.48362	-2.48362	3.01981e-14	No Effect
csn[c]	-0.0486984	-0.0324656	0.0162328	Change
ctp[c]	-0.211026	-0.211026	9.99201e-16	No Effect
ctp[h]	-0.211026	-0.211026	9.99201e-16	No Effect
ctp[m]	0	0	0	No Effect
cyart[c]	-1.85054	-1.85054	1.9984e-14	No Effect
cyeuol[c]	-1.85866	-1.85866	1.9984e-14	No Effect
cys-L[c]	-0.0649312	-0.0649312	9.02056e-16	No Effect
cys-L[h]	-0.0649312	-0.0649312	9.02056e-16	No Effect
cys-L[m]	0	0	0	No Effect
cyst-L[h]	-0.129862	-0.129862	1.9984e-15	No Effect
cystrna[c]	-0.0649312	-0.0649312	4.996e-16	No Effect
cytc[h]	0	0	0	No Effect
cytc[m]	0	0	0	No Effect
cytd[c]	-0.178561	-0.178561	1.9984e-15	No Effect
cytP450o[c]	3.94298e-16	1.98467e-16	1.95831e-16	No Effect
cytP450o[h]	0	0	0	No Effect
cytP450r[c]	0	0	0	No Effect
cytP450r[h]	-0.0162328	-0.0162328	6.00214e-16	No Effect
dad-2[c]	-0.267841	-0.267841	5.9952e-15	No Effect
dadp[c]	-0.284074	-0.284074	5.9952e-15	No Effect
dadp[h]	-0.0649312	-0.0649312	9.99201e-16	No Effect
dadp[m]	0	0	0	No Effect
damp[c]	-0.267841	-0.267841	5.9952e-15	No Effect
damp[h]	0	0	0	No Effect
damp[m]	1.66533e-16	0	1.66533e-16	No Effect
datp[c]	-0.284074	-0.284074	5.9952e-15	No Effect
datp[m]	-1.55615e-16	-3.20897e-17	1.23526e-16	No Effect
db4p[h]	-0.146095	-0.146095	1.9984e-15	No Effect
dc2coa[m]	-0.535682	-0.535682	5.9952e-15	No Effect
dc2coa[x]	-0.535682	-0.535682	7.99361e-15	No Effect
dca[h]	-0.470751	-0.470751	1.9984e-15	No Effect
dcaACP[h]	-0.227259	-0.11363	0.11363	Change
dcacoa[m]	-0.535682	-0.535682	5.9952e-15	No Effect
dcacoa[x]	-0.535682	-0.551915	0.0162328	Change
dcamp[c]	-0.31654	-0.31654	5.9952e-15	No Effect
dcamp[h]	-0.154212	-0.154212	1.09912e-14	No Effect
dcaro[h]	-2.46739	-2.46739	3.01981e-14	No Effect
dcdp[c]	-0.194794	-0.194794	9.99201e-16	No Effect
dcdp[m]	0	0	0	No Effect
dcmp[c]	-0.178561	-0.178561	1.9984e-15	No Effect
dctp[c]	-0.194794	-0.194794	9.99201e-16	No Effect
dctp[m]	-1.55615e-16	-7.92194e-18	1.47693e-16	No Effect
dcyt[c]	-0.178561	-0.178561	1.9984e-15	No Effect
dd2coa[m]	-0.551915	-0.551915	7.99361e-15	No Effect
dd2coa[x]	-0.551915	-0.568148	0.0162328	Change
ddca[h]	-0.584381	-0.584381	2.9976e-15	No Effect
ddcaACP[h]	-0.340889	-0.227259	0.11363	Change
ddcacoa[m]	-0.551915	-0.551915	6.99441e-15	No Effect
ddcacoa[x]	-0.551915	-0.568148	0.0162328	Change
ddmcital[c]	-5.18959e-16	-6.16298e-33	5.18959e-16	No Effect
ddsmsterol[c]	-1.85054	-1.85054	1.9984e-14	No Effect
dedoldp[c]	-3.40889	-3.40889	2.9754e-14	No Effect
degly[e]	0	0	0	No Effect
dgdg1819Z160[h]	-0.746709	-0.746709	3.80806e-14	No Effect
dgdg1819Z1617Z[h]	-0.803523	-0.803523	3.39728e-14	No Effect
dgdg1819Z1619Z[h]	-0.803523	-0.803523	3.29736e-14	No Effect
dgdg1819Z1627Z10Z[h]	-0.860338	-0.860338	2.79776e-14	No Effect
dgdg1819Z1634Z7Z10Z[h]	-0.917153	-0.917153	2.39808e-14	No Effect
dgdg1819Z1637Z10Z13Z[h]	-0.917153	-0.917153	2.29816e-14	No Effect
dgdg1829Z12Z160[h]	-0.803523	-0.803523	3.29736e-14	No Effect
dgdg1829Z12Z1617Z[h]	-0.860338	-0.860338	2.79776e-14	No Effect
dgdg1829Z12Z1619Z[h]	-0.860338	-0.860338	2.79776e-14	No Effect
dgdg1829Z12Z1627Z10Z[h]	-0.917153	-0.917153	2.29816e-14	No Effect
dgdg1829Z12Z1634Z7Z10Z[h]	-0.973968	-0.973968	1.90958e-14	No Effect
dgdg1829Z12Z1637Z10Z13Z[h]	-0.973968	-0.973968	1.90958e-14	No Effect
dgdg1839Z12Z15Z160[h]	-0.860338	-0.860338	2.79776e-14	No Effect
dgdg1839Z12Z15Z1627Z10Z[h]	-0.973968	-0.973968	1.80966e-14	No Effect
dgdg1839Z12Z15Z1634Z7Z10Z[h]	-1.03078	-1.03078	9.99201e-15	No Effect
dgdg1839Z12Z15Z1637Z10Z13Z[h]	-1.03078	-1.03078	9.99201e-15	No Effect
dgdg1839Z12Z15Z1644Z7Z10Z13Z[h]	-1.0876	-1.0876	9.99201e-15	No Effect
dgdp[c]	-0.300307	-0.300307	5.9952e-15	No Effect
dgdp[m]	0	0	0	No Effect
dghs16018111Z[c]	-0.722359	-0.722359	2.59792e-14	No Effect
dghs1601819Z[c]	-0.470751	-0.470751	3.10307e-14	No Effect
dghs18111Z18111Z[c]	-1.00643	-1.00643	1.9984e-14	No Effect
dghs18111Z1819Z[c]	-0.754825	-0.754825	2.89768e-14	No Effect
dghs1819Z18111Z[c]	-0.754825	-0.754825	2.89768e-14	No Effect
dghs1819Z1819Z[c]	-0.503217	-0.503217	3.39728e-14	No Effect
dgmp[c]	-0.284074	-0.284074	5.9952e-15	No Effect
dgsn[c]	-0.284074	-0.284074	4.996e-15	No Effect
dgtp[c]	-0.300307	-0.300307	5.9952e-15	No Effect
dgtp[m]	-3.86185e-16	-8.04282e-17	3.05756e-16	No Effect
dgts16018111Z[c]	-0.746709	-0.746709	2.69784e-14	No Effect
dgts1601819Z[c]	-0.4951	-0.4951	3.19744e-14	No Effect
dgts1601829Z12Z[c]	-0.4951	-0.4951	3.09752e-14	No Effect
dgts1601835Z9Z12Z[c]	-0.4951	-0.4951	2.9976e-14	No Effect
dgts1601845Z9Z12Z15Z[c]	-0.4951	-0.4951	2.79776e-14	No Effect
dgts18111Z18111Z[c]	-1.03078	-1.03078	2.9976e-14	No Effect
dgts18111Z1819Z[c]	-0.779174	-0.779174	3.0087e-14	No Effect
dgts18111Z1829Z12Z[c]	-0.779174	-0.779174	2.90878e-14	No Effect
dgts18111Z1835Z9Z12Z[c]	-0.779174	-0.779174	2.80886e-14	No Effect
dgts18111Z1845Z9Z12Z15Z[c]	-0.779174	-0.779174	2.60902e-14	No Effect
dgts1819Z18111Z[c]	-0.779174	-0.779174	3.0087e-14	No Effect
dgts1819Z1819Z[c]	-0.527566	-0.527566	3.4972e-14	No Effect
dgts1819Z1829Z12Z[c]	-0.527566	-0.527566	3.39728e-14	No Effect
dgts1819Z1835Z9Z12Z[c]	-0.527566	-0.527566	3.19744e-14	No Effect
dgts1819Z1845Z9Z12Z15Z[c]	-0.527566	-0.527566	3.09752e-14	No Effect
dgts1829Z12Z18111Z[c]	-0.779174	-0.779174	2.90878e-14	No Effect
dgts1829Z12Z1819Z[c]	-0.527566	-0.527566	3.29736e-14	No Effect
dgts1829Z12Z1829Z12Z[c]	-0.527566	-0.527566	3.19744e-14	No Effect
dgts1829Z12Z1835Z9Z12Z[c]	-0.527566	-0.527566	3.09752e-14	No Effect
dgts1829Z12Z1845Z9Z12Z15Z[c]	-0.527566	-0.527566	2.9976e-14	No Effect
dgts1839Z12Z15Z18111Z[c]	-0.779174	-0.779174	2.80886e-14	No Effect
dgts1839Z12Z15Z1819Z[c]	-0.527566	-0.527566	3.19744e-14	No Effect
dgts1839Z12Z15Z1835Z9Z12Z[c]	-0.527566	-0.527566	2.9976e-14	No Effect
dgts1839Z12Z15Z1845Z9Z12Z15Z[c]	-0.527566	-0.527566	2.79776e-14	No Effect
dhap[c]	-0.0486984	-0.0486984	4.02456e-16	No Effect
dhap[f]	-0.11363	-0.11363	2.9976e-15	No Effect
dhap[h]	-0.11363	-0.11363	9.99201e-16	No Effect
dhap[m]	0.0324656	0.0324656	8.95117e-16	No Effect
dhdascb[u]	-2.59479e-16	9.90266e-17	3.58506e-16	No Effect
dhf[c]	0.0081164	0.0081164	7.30319e-16	No Effect
dhlam[h]	0	0	0	No Effect
dhlam[m]	0.162328	0.162328	1.9984e-15	No Effect
dhlpro[m]	0.0081164	0.0081164	2.498e-16	No Effect
dhnpt[c]	0	0	0	No Effect
dhor-S[c]	-0.0324656	-0.0324656	3.95517e-16	No Effect
dhor-S[m]	-0.0324656	-0.0324656	7.00828e-16	No Effect
dhpmp[c]	-0.284074	-0.284074	5.9952e-15	No Effect
dhpt[c]	0.0730476	0.0730476	1.40166e-15	No Effect
dhretinol[s]	-1.26616	-1.26616	9.99201e-15	No Effect
din[c]	-0.267841	-0.267841	3.9968e-15	No Effect
dkmpp[c]	-0.121746	-0.121746	1.9984e-15	No Effect
dma[c]	0	0	0	No Effect
dmbzid[c]	-9.08495e-16	-1.27734e-16	7.80761e-16	No Effect
dmcital[c]	0	0	0	No Effect
dmlz[h]	0.081164	0.081164	1.30451e-15	No Effect
dmpp[c]	-0.324656	-0.324656	1.9984e-15	No Effect
dmpp[h]	-0.324656	-0.324656	1.9984e-15	No Effect
dmpq[h]	-1.56646	-1.56646	1.9984e-14	No Effect
dna5mtc[n]	-0.0081164	-0.0081164	1.05992e-15	No Effect
dnac[n]	0	0	0	No Effect
dnad[c]	-0.284074	-0.284074	5.9952e-15	No Effect
dnad[h]	-0.154212	-0.154212	7.99361e-15	No Effect
dnad[n]	-0.284074	-0.284074	5.9952e-15	No Effect
doldp[c]	-3.40889	-3.40889	2.9754e-14	No Effect
doldpglcnac[c]	-3.52252	-3.52252	3.01981e-14	No Effect
doldpglcnacglcnac[c]	-3.61991	-3.61991	3.9968e-14	No Effect
doldpglcnacglcnacman[c]	-3.70108	-3.70108	3.9968e-14	No Effect
doldpglcnacglcnacman-LPAREN-man-LPAREN-manman-RPAREN-manman-RPAREN-manmanman[c]	-4.35039	-4.35039	5.9508e-14	No Effect
doldpglcnacglcnacman-LPAREN-man-LPAREN-manman-RPAREN-manman-RPAREN-manmanmanglc[c]	-4.43155	-4.43155	6.03961e-14	No Effect
doldpglcnacglcnacman-LPAREN-man-LPAREN-manman-RPAREN-manman-RPAREN-manmanmanglcglc[c]	-4.51272	-4.51272	7.01661e-14	No Effect
doldpglcnacglcnacman-LPAREN-man-LPAREN-manman-RPAREN-manman-RPAREN-manmanmanglcglcglc[c]	-4.59388	-4.59388	5.9508e-14	No Effect
doldpglcnacglcnacman-LPAREN-man-LPAREN-man-RPAREN-manman-RPAREN-manmanman[c]	-4.26923	-4.26923	6.03961e-14	No Effect
doldpglcnacglcnacman-LPAREN-manmanman-RPAREN-manmanman[c]	-4.18806	-4.18806	4.9738e-14	No Effect
doldpglcnacglcnacman-LPAREN-manman-RPAREN-manmanman[c]	-4.1069	-4.1069	5.06262e-14	No Effect
doldpglcnacglcnacman-LPAREN-man-RPAREN-man[c]	-3.86341	-3.86341	3.9968e-14	No Effect
doldpglcnacglcnacman-LPAREN-man-RPAREN-manman[c]	-3.94457	-3.94457	5.01821e-14	No Effect
doldpglcnacglcnacman-LPAREN-man-RPAREN-manmanman[c]	-4.02573	-4.02573	4.9738e-14	No Effect
doldpglcnacglcnacmanman[c]	-3.78224	-3.78224	3.9968e-14	No Effect
dolmanp[c]	-3.49005	-3.49005	3.9968e-14	No Effect
dolp[c]	-3.40889	-3.40889	2.9754e-14	No Effect
dolpglc[c]	-3.49005	-3.49005	3.9968e-14	No Effect
dpcoa[c]	-0.438285	-0.438285	9.99201e-16	No Effect
drib[c]	0	0	0	No Effect
dscl[h]	-1.57458	-1.57458	2.9976e-14	No Effect
dsmsterol[c]	-1.85054	-1.85054	1.9984e-14	No Effect
dtdp[c]	-0.20291	-0.20291	2.9976e-15	No Effect
dtdp[m]	0	0	0	No Effect
dtmp[c]	-0.186677	-0.186677	2.9976e-15	No Effect
dttp[c]	-0.20291	-0.20291	2.9976e-15	No Effect
dttp[m]	-1.55615e-16	-5.10844e-18	1.50507e-16	No Effect
dudp[c]	-0.178561	-0.178561	2.9976e-15	No Effect
dudp[m]	1.66533e-16	0	1.66533e-16	No Effect
dump[c]	-0.178561	-0.178561	2.9976e-15	No Effect
duri[c]	-0.178561	-0.178561	3.9968e-15	No Effect
dutp[c]	-0.194794	-0.194794	1.9984e-15	No Effect
dutp[m]	0	0	0	No Effect
dvchlda[h]	-1.92359	-1.92359	3.9968e-14	No Effect
dvite[h]	-1.55835	-1.55835	9.99201e-15	No Effect
dvpchlda[h]	-1.92359	-1.92359	3.9968e-14	No Effect
dxyl5p[h]	-0.194794	-0.194794	2.9976e-15	No Effect
e4p[h]	-0.129862	-0.129862	1.9984e-15	No Effect
ecaro[h]	-2.46739	-2.46739	3.01981e-14	No Effect
echn[u]	-2.48362	-2.48362	3.01981e-14	No Effect
egly[e]	0	0	0	No Effect
eig3p[c]	-0.178561	-0.178561	1.9984e-15	No Effect
eig3p[h]	-0.259725	-0.259725	0	No Effect
epm[h]	-0.246197	-0.246197	7.02216e-15	No Effect
etfox[m]	1.18451e-15	2.01346e-18	1.18249e-15	No Effect
etfrd[m]	0	0	0	No Effect
etha[c]	-0.0162328	-0.0162328	1.19696e-15	No Effect
ethamp[c]	-0.0324656	-0.0324656	2.01228e-16	No Effect
etoh[c]	-0.0162328	-0.0162328	1.40166e-15	No Effect
etoh[e]	0	0	0	No Effect
etoh[h]	-0.0162328	-0.0162328	1.40166e-15	No Effect
etoh[m]	-0.0162328	-0.0162328	1.40166e-15	No Effect
etoh[x]	-0.0162328	-0.0162328	1.40166e-15	No Effect
f1p[h]	-0.229965	-0.229965	4.996e-15	No Effect
f26bp[c]	-0.0973968	-0.0973968	8.04912e-16	No Effect
f2p[h]	-0.229965	-0.229965	4.996e-15	No Effect
f6p-B[c]	-0.0973968	-0.0973968	1.4988e-15	No Effect
f6p-B[h]	-0.162328	-0.162328	2.9976e-15	No Effect
fad[c]	-0.284074	-0.284074	4.996e-15	No Effect
fad[h]	-0.284074	-0.284074	4.996e-15	No Effect
fad[m]	-0.284074	-0.284074	4.996e-15	No Effect
fad[x]	-0.284074	-0.284074	4.996e-15	No Effect
fadh2[c]	-0.284074	-0.284074	2.9976e-15	No Effect
fadh2[h]	-0.284074	-0.284074	2.9976e-15	No Effect
fadh2[m]	-0.284074	-0.284074	2.9976e-15	No Effect
fadh2[x]	-0.284074	-0.284074	2.9976e-15	No Effect
fald[c]	-0.0243492	-0.0243492	3.01842e-16	No Effect
fdp-B[c]	-0.0973968	-0.0973968	9.02056e-16	No Effect
fdp-B[f]	-0.0973968	-0.0973968	9.02056e-16	No Effect
fdp-B[h]	-0.227259	-0.227259	2.9976e-15	No Effect
fdp-B[m]	0	0	0	No Effect
fdxox[c]	0	0	0	No Effect
fdxox[h]	0	0	0	No Effect
fdxox[m]	0	0	0	No Effect
fdxox[u]	0	0	0	No Effect
fdxrd[c]	-0.0081164	-0.0081164	2.41127e-16	No Effect
fdxrd[h]	-0.0081164	-0.0081164	2.498e-16	No Effect
fdxrd[m]	-0.0081164	-0.0081164	2.94903e-17	No Effect
fdxrd[u]	-0.0162328	-0.0162328	6.00214e-16	No Effect
fe2[c]	0	0	0	No Effect
fe2[e]	0	0	0	No Effect
fe2[h]	0	0	0	No Effect
fe3[c]	0	0	0	No Effect
fe3[e]	0	0	0	No Effect
fe3[h]	0	8.11207e-17	8.11207e-17	No Effect
fgam[c]	-0.20291	-0.20291	9.99201e-16	No Effect
fgam[h]	-0.275958	-0.275958	9.99201e-16	No Effect
fgam[m]	-0.0162328	-0.0162328	1.20043e-15	No Effect
ficytb5[c]	0	0	0	No Effect
ficytc[h]	0	0	0	No Effect
ficytc[m]	0	0	0	No Effect
ficytc[x]	-0.0162328	-0.0162328	3.98986e-16	No Effect
fmettrna[c]	-0.137979	-0.137979	1.9984e-15	No Effect
fmn[c]	0	0	0	No Effect
focytb5[c]	0	0	0	No Effect
focytc[h]	0	0	0	No Effect
focytc[m]	2.97998e-16	3.09267e-17	2.67071e-16	No Effect
focytc[x]	0	0	0	No Effect
fol[c]	0	0	0	No Effect
for[c]	6.16343e-16	3.19335e-17	5.84409e-16	No Effect
for[e]	0	0	0	No Effect
for[h]	5.69306e-16	-3.16073e-17	6.00914e-16	No Effect
for[m]	3.42434e-16	3.19335e-17	3.10501e-16	No Effect
for[x]	1.39199e-16	-3.13387e-17	1.70538e-16	No Effect
fpram[c]	-0.235376	-0.235376	2.9976e-15	No Effect
fpram[h]	-0.251608	-0.251608	2.9976e-15	No Effect
fprica[c]	-0.284074	-0.284074	4.996e-15	No Effect
frdp[c]	-0.941502	-0.941502	8.99281e-15	No Effect
frdp[h]	-0.941502	-0.941502	7.99361e-15	No Effect
frdp[m]	-0.941502	-0.941502	8.99281e-15	No Effect
frmd[c]	6.16343e-16	3.19335e-17	5.84409e-16	No Effect
frmd[x]	7.55542e-16	5.94773e-19	7.54947e-16	No Effect
fru-B[c]	-0.081164	-0.081164	2.30371e-15	No Effect
fru-B[h]	-0.165033	-0.165033	4.996e-15	No Effect
fum[c]	-0.0324656	-0.0324656	4.996e-16	No Effect
fum[h]	0	0	0	No Effect
fum[m]	-0.0324656	-0.0324656	7.97973e-16	No Effect
g1p[c]	-0.0973968	-0.0973968	1.4988e-15	No Effect
g1p[h]	-0.162328	-0.162328	2.9976e-15	No Effect
g3p[c]	-0.0486984	-0.0486984	4.996e-16	No Effect
g3p[f]	0.0162328	0.0162328	1.4988e-15	No Effect
g3p[h]	-0.11363	-0.11363	9.99201e-16	No Effect
g3p[m]	-0.0324656	-0.0324656	8.95117e-16	No Effect
g3pe[c]	-0.081164	-0.0486984	0.0324656	Change
g6p-A[c]	-0.0973968	-0.0973968	1.4988e-15	No Effect
g6p-A[h]	-0.162328	-0.162328	2.9976e-15	No Effect
g6p-A[n]	0.0973968	0.0973968	2.70617e-15	No Effect
g6p-B[c]	-0.0973968	-0.0973968	1.4988e-15	No Effect
g6p-B[h]	-0.162328	-0.162328	2.9976e-15	No Effect
gal[c]	-0.081164	-0.081164	2.10942e-15	No Effect
gal[h]	-0.081164	-0.081164	2.20657e-15	No Effect
gal[n]	3.21892e-16	-6.18535e-17	3.83745e-16	No Effect
gal1p[c]	-0.0973968	-0.0973968	1.09635e-15	No Effect
gal1p[h]	-0.146095	-0.146095	1.9984e-15	No Effect
galctn-D[n]	0	0	0	No Effect
gam6p[c]	-0.0973968	-0.0973968	9.02056e-16	No Effect
gar[c]	-0.186677	-0.186677	0	No Effect
gar[h]	-0.267841	-0.267841	2.9976e-15	No Effect
gar[m]	0	0	0	No Effect
gcald[c]	0	0	0	No Effect
gcaro[h]	-2.46739	-2.46739	3.01981e-14	No Effect
gcaro[u]	-2.46739	-2.46739	3.01981e-14	No Effect
gdp[c]	-0.300307	-0.300307	6.99441e-15	No Effect
gdp[h]	0	0	0	No Effect
gdp[m]	0	0	0	No Effect
gdpmann[c]	-0.381471	-0.381471	2.9976e-15	No Effect
gdptp[c]	-0.31654	-0.31654	6.99441e-15	No Effect
ggchlda[u]	-3.17351	-3.17351	5.01821e-14	No Effect
ggchldb[u]	-3.17351	-3.17351	5.01821e-14	No Effect
ggdp[h]	-1.24993	-1.24993	9.99201e-15	No Effect
ggdp[u]	-1.24993	-1.24993	9.99201e-15	No Effect
ggl[h]	-0.0973968	-0.0973968	3.40006e-15	No Effect
glc-A[c]	-0.081164	-0.081164	2.40086e-15	No Effect
glc-A[h]	-0.165033	-0.165033	4.996e-15	No Effect
glc-B[c]	-0.081164	-0.081164	2.40086e-15	No Effect
glc-B[h]	-0.0973968	-0.0973968	1.9984e-15	No Effect
glcn[h]	-0.0324656	-0.0324656	9.71445e-17	No Effect
glcur[c]	0	0	0	No Effect
gln-L[c]	-0.0649312	-0.0649312	0	No Effect
gln-L[e]	-0.0649312	-0.0649312	0	No Effect
gln-L[h]	-0.0649312	-0.0649312	9.71445e-17	No Effect
gln-L[m]	-0.0486984	-0.0486984	1.20043e-15	No Effect
glntrna[c]	-0.0649312	-0.0649312	4.02456e-16	No Effect
glu1sa[h]	-0.194794	-0.194794	2.9976e-15	No Effect
glu5p[c]	-0.0649312	-0.0649312	6.93889e-16	No Effect
glu5p[m]	-0.0649312	-0.0649312	1.29063e-15	No Effect
glu5p[x]	8.36879e-17	7.96836e-17	4.00427e-18	No Effect
glu5sa[c]	-0.0649312	-0.0649312	1.59595e-15	No Effect
glu5sa[m]	-0.0649312	-0.0649312	1.69309e-15	No Effect
glu5sa[x]	0	0	0	No Effect
glucys[h]	-0.129862	-0.129862	9.99201e-16	No Effect
glu-L[c]	-0.0486984	-0.0486984	1.09635e-15	No Effect
glu-L[h]	-0.0649312	-0.0649312	4.02456e-16	No Effect
glu-L[m]	-0.0486984	-0.0486984	1.39472e-15	No Effect
glutrna[c]	-0.0486984	-0.0486984	1.59595e-15	No Effect
glutrna[h]	0	0	0	No Effect
glx[c]	-0.0243492	-0.0243492	9.71445e-17	No Effect
glx[h]	-0.0162328	-0.0162328	6.00214e-16	No Effect
glx[m]	-0.0162328	-0.0162328	4.02456e-16	No Effect
glx[x]	-0.0243492	-0.0243492	9.71445e-17	No Effect
gly[c]	-0.0081164	-0.0081164	5.0307e-17	No Effect
gly[h]	-0.0081164	-0.0081164	5.89806e-17	No Effect
gly[m]	-0.0081164	-0.0081164	2.28983e-16	No Effect
gly[x]	-0.0081164	-0.0081164	3.69496e-16	No Effect
glyald[c]	-0.0162328	-0.0162328	1.59942e-15	No Effect
glyald[h]	-0.116335	-0.116335	2.9976e-15	No Effect
glyc[c]	-0.0162328	-0.0162328	1.20043e-15	No Effect
glyc[h]	-0.0162328	-0.0162328	1.09981e-15	No Effect
glyc3p[c]	-0.0324656	-0.0324656	2.01228e-16	No Effect
glyc3p[h]	-0.129862	-0.129862	9.99201e-16	No Effect
glyclt[c]	-0.0243492	-0.0243492	4.996e-16	No Effect
glyclt[e]	-0.0243492	-0.0243492	4.996e-16	No Effect
glyclt[h]	-0.0243492	-0.0243492	4.996e-16	No Effect
glyclt[m]	-0.0243492	-0.0243492	4.996e-16	No Effect
glyclt[x]	-0.0243492	-0.0243492	4.996e-16	No Effect
glyc-R[c]	-0.0162328	-0.0162328	1.40166e-15	No Effect
glyc-R[h]	-0.0324656	-0.0324656	1.09635e-15	No Effect
glyc-R[m]	-0.0243492	-0.0243492	3.01842e-16	No Effect
glytrna[c]	-0.0081164	-0.0081164	3.90313e-16	No Effect
glytrna[m]	-0.0081164	-0.0081164	9.38485e-16	No Effect
gmp[c]	-0.284074	-0.284074	5.9952e-15	No Effect
gmp[m]	-0.284074	-0.284074	6.99441e-15	No Effect
gmp[n]	-0.284074	-0.284074	5.9952e-15	No Effect
grdp[c]	-0.633079	-0.633079	4.996e-15	No Effect
grdp[h]	-0.633079	-0.633079	4.996e-15	No Effect
gsn[c]	-0.267841	-0.267841	4.996e-15	No Effect
gthox[c]	0	0	0	No Effect
gthox[h]	-0.259725	-0.259725	9.99201e-16	No Effect
gthox[m]	0	0	0	No Effect
gthox[u]	-0.259725	-0.259725	9.99201e-16	No Effect
gthrd[c]	9.85334e-17	-9.56282e-17	1.94162e-16	No Effect
gthrd[h]	-0.137979	-0.137979	9.99201e-16	No Effect
gthrd[m]	0	0	0	No Effect
gthrd[u]	-0.137979	-0.137979	9.99201e-16	No Effect
gtp[c]	-0.300307	-0.300307	6.99441e-15	No Effect
gtp[h]	0.0973968	0.0973968	2.70617e-15	No Effect
gtp[m]	-5.81437e-16	-1.62061e-16	4.19376e-16	No Effect
gtp[n]	-0.284074	-0.284074	5.9952e-15	No Effect
gua[c]	-0.137979	-0.137979	7.99361e-15	No Effect
gua[e]	-0.137979	-0.137979	7.99361e-15	No Effect
h[c]	-6.16343e-16	-3.19335e-17	5.84409e-16	No Effect
h[e]	0	0	0	No Effect
h[f]	-3.9443e-31	2.33577e-30	2.7302e-30	No Effect
h[g]	-6.16343e-16	-3.19335e-17	5.84409e-16	No Effect
h[h]	-5.69306e-16	3.16073e-17	6.00914e-16	No Effect
h[m]	-3.42434e-16	-3.19335e-17	3.10501e-16	No Effect
h[n]	0	0	0	No Effect
h[s]	-5.69306e-16	3.16073e-17	6.00914e-16	No Effect
h[u]	-5.69306e-16	3.16073e-17	6.00914e-16	No Effect
h[x]	-1.39199e-16	3.13387e-17	1.70538e-16	No Effect
h2[c]	-0.0162328	-0.0162328	7.00828e-16	No Effect
h2[e]	0	0	0	No Effect
h2[h]	-0.0162328	-0.0162328	7.00828e-16	No Effect
h2[m]	-0.0162328	-0.0162328	7.00828e-16	No Effect
h2mb4p[h]	-0.308423	-0.308423	1.9984e-15	No Effect
h2o[c]	0	0	0	No Effect
h2o[e]	0	0	0	No Effect
h2o[f]	0	0	0	No Effect
h2o[h]	0	-9.90266e-17	9.90266e-17	No Effect
h2o[m]	1.99464e-16	0	1.99464e-16	No Effect
h2o[n]	0	0	0	No Effect
h2o[s]	0	-9.90266e-17	9.90266e-17	No Effect
h2o[u]	0	-9.90266e-17	9.90266e-17	No Effect
h2o[x]	0	0	0	No Effect
h2o2[c]	-1.97067e-16	-6.18535e-17	1.35213e-16	No Effect
h2o2[h]	-0.0162328	-0.0162328	2.01228e-16	No Effect
h2o2[m]	-1.97067e-16	-6.18535e-17	1.35213e-16	No Effect
h2o2[n]	-1.97067e-16	-6.18535e-17	1.35213e-16	No Effect
h2o2[x]	-1.97067e-16	-6.18535e-17	1.35213e-16	No Effect
h2s[h]	-0.0486984	-0.0486984	2.29677e-15	No Effect
hcarn[c]	0	0	0	No Effect
hco3[c]	6.16343e-16	3.19335e-17	5.84409e-16	No Effect
hco3[e]	-9.86076e-32	-6.16298e-33	9.24446e-32	No Effect
hco3[h]	5.69306e-16	-3.16073e-17	6.00914e-16	No Effect
hco3[m]	5.41899e-16	3.19335e-17	5.09965e-16	No Effect
hcys-L[c]	-0.11363	-0.11363	2.9976e-15	No Effect
hcys-L[h]	-0.11363	-0.11363	2.9976e-15	No Effect
hcys-L[m]	-0.11363	-0.11363	2.9976e-15	No Effect
hdca[c]	-0.129862	-0.129862	1.20182e-14	No Effect
hdca[h]	-0.129862	-0.129862	1.20182e-14	No Effect
hdca[s]	-0.129862	-0.129862	1.20182e-14	No Effect
hdcea[c]	-0.300307	-0.300307	8.99281e-15	No Effect
hdcea[h]	-0.300307	-0.300307	8.99281e-15	No Effect
hdd2coa[m]	-0.584381	-0.584381	1.09912e-14	No Effect
hdd2coa[x]	-0.600613	-0.600613	9.99201e-15	No Effect
hdeACP[h]	-0.0568148	0.0568148	0.11363	Change
hemeA[m]	-2.80827	-2.80827	3.9968e-14	No Effect
hemeO[m]	-2.80827	-2.80827	3.9968e-14	No Effect
hexACP[h]	0	0.11363	0.11363	Change
hgentis[c]	-0.211026	-0.211026	4.996e-15	No Effect
hgentis[h]	-0.211026	-0.211026	4.996e-15	No Effect
his-L[c]	-0.178561	-0.178561	9.99201e-16	No Effect
his-L[e]	-0.178561	-0.178561	0	No Effect
his-L[h]	-0.178561	-0.178561	9.99201e-16	No Effect
hisp[c]	-0.178561	-0.178561	1.9984e-15	No Effect
hisp[h]	-0.275958	-0.275958	1.9984e-15	No Effect
hista[c]	-0.178561	-0.178561	9.99201e-16	No Effect
histd[c]	-0.178561	-0.178561	9.99201e-16	No Effect
histd[h]	-0.211026	-0.211026	1.9984e-15	No Effect
histrna[c]	-0.178561	-0.178561	0	No Effect
hmbil[h]	-1.55835	-1.55835	1.9984e-14	No Effect
hmgcoa[c]	-0.470751	-0.470751	0	No Effect
hmgcoa[m]	-0.470751	-0.470751	0	No Effect
hmppp9me[h]	-1.89112	-1.89112	3.9968e-14	No Effect
hom-L[h]	-0.0649312	-0.0649312	1.09635e-15	No Effect
hpglu[m]	0.0081164	0.0081164	5.10009e-16	No Effect
hpyr[c]	-0.0162328	-0.0162328	1.20043e-15	No Effect
hpyr[m]	-0.0243492	-0.0243492	2.01228e-16	No Effect
hso3[c]	3.21892e-16	-1.63206e-16	4.85098e-16	No Effect
hso3[e]	-0.0162328	-0.0162328	9.99201e-16	No Effect
hso3[h]	3.21892e-16	-1.63206e-16	4.85098e-16	No Effect
hso3[m]	1.22428e-16	-6.18535e-17	1.84281e-16	No Effect
hx2coa[m]	-0.503217	-0.503217	2.9976e-15	No Effect
hx2coa[x]	-0.503217	-0.503217	3.9968e-15	No Effect
hxan[c]	-0.137979	-0.137979	7.99361e-15	No Effect
hxan[e]	-0.137979	-0.137979	7.99361e-15	No Effect
hxcoa[m]	-0.503217	-0.503217	2.9976e-15	No Effect
hxcoa[x]	-0.503217	-0.503217	4.996e-15	No Effect
hxdcal[c]	-0.11363	-0.11363	1.30035e-14	No Effect
hxdceal[c]	-0.11363	-0.11363	1.20043e-14	No Effect
ibcoa[m]	-0.486984	-0.486984	9.99201e-16	No Effect
icit[c]	-0.0486984	-0.0486984	1.20043e-15	No Effect
icit[h]	0	0	0	No Effect
icit[m]	-0.0486984	-0.0486984	1.4988e-15	No Effect
icit[x]	-0.0486984	-0.0486984	1.20043e-15	No Effect
idp[c]	-0.300307	-0.300307	5.9952e-15	No Effect
idp[m]	1.66533e-16	0	1.66533e-16	No Effect
ile-L[c]	-0.162328	-0.162328	9.99201e-16	No Effect
ile-L[h]	-0.162328	-0.162328	0	No Effect
ile-L[m]	-0.162328	-0.162328	9.99201e-16	No Effect
iletrna[c]	-0.162328	-0.162328	0	No Effect
im4ac[c]	-0.178561	-0.178561	0	No Effect
im4act[c]	-0.178561	-0.178561	9.99201e-16	No Effect
imacp[c]	-0.178561	-0.178561	1.9984e-15	No Effect
imacp[h]	-0.259725	-0.259725	0	No Effect
imp[c]	-0.284074	-0.284074	4.996e-15	No Effect
imp[h]	-0.284074	-0.284074	4.996e-15	No Effect
imp[m]	-0.284074	-0.284074	4.996e-15	No Effect
indole[h]	-0.340889	-0.340889	4.996e-15	No Effect
inost[c]	-0.0973968	-0.0973968	2.09555e-15	No Effect
inost[h]	0	0	0	No Effect
ins[c]	-0.267841	-0.267841	4.996e-15	No Effect
ipdp[c]	-0.324656	-0.324656	1.9984e-15	No Effect
ipdp[h]	-0.324656	-0.324656	1.9984e-15	No Effect
itp[c]	-0.300307	-0.300307	5.9952e-15	No Effect
itp[m]	0	0	0	No Effect
ivcoa[m]	-0.486984	-0.486984	3.9968e-15	No Effect
lac-D[c]	-0.0162328	-0.0162328	9.02056e-16	No Effect
lac-D[e]	-0.0162328	-0.0162328	1.50227e-15	No Effect
lac-D[m]	-0.0162328	-0.0162328	1.20043e-15	No Effect
lac-L[h]	-0.0324656	-0.0324656	3.95517e-16	No Effect
lac-L[m]	-0.0162328	-0.0162328	1.20043e-15	No Effect
lac-L[x]	0	0	0	No Effect
lald-D[c]	2.16325e-16	-1.98467e-16	4.14791e-16	No Effect
lanost[c]	-1.85054	-1.85054	1.9984e-14	No Effect
lcts[h]	-0.246197	-0.246197	7.02216e-15	No Effect
Lcyst[h]	0	0	0	No Effect
Lcyst[m]	0	0	0	No Effect
Lcystin[h]	-0.0162328	-0.0162328	7.00828e-16	No Effect
leu-L[c]	-0.0324656	-0.0324656	4.70457e-15	No Effect
leu-L[e]	-0.0324656	-0.0324656	4.70457e-15	No Effect
leu-L[h]	-0.0324656	-0.0324656	4.60049e-15	No Effect
leu-L[m]	-0.0324656	-0.0324656	4.9058e-15	No Effect
leutrna[c]	0	0	0	No Effect
Lfmkynr[c]	-0.357122	-0.357122	5.9952e-15	No Effect
lgt-S[c]	9.85334e-17	0	9.85334e-17	No Effect
lgt-S[m]	-0.0162328	-0.0162328	1.70003e-15	No Effect
lido[c]	1.03792e-15	1.2326e-32	1.03792e-15	No Effect
lido[e]	1.03792e-15	1.2326e-32	1.03792e-15	No Effect
Lkynr[c]	-0.357122	-0.357122	5.9952e-15	No Effect
lnlc[c]	-0.162328	-0.162328	1.40166e-14	No Effect
lnlc[h]	-0.162328	-0.162328	1.40166e-14	No Effect
lnlccoa[c]	-0.616846	-0.616846	1.29896e-14	No Effect
lnlnca[c]	0	0	0	No Effect
lnlncacoa[c]	-0.454518	-0.454518	9.99201e-16	No Effect
lnlncg[c]	-0.162328	-0.162328	1.40166e-14	No Effect
lnlncgcoa[c]	-0.616846	-0.616846	1.19904e-14	No Effect
loroxan[u]	-2.51608	-2.51608	1.9984e-14	No Effect
lpam[h]	0.0162328	0.0162328	7.00828e-16	No Effect
lpam[m]	0.162328	0.162328	1.9984e-15	No Effect
lpro[m]	0.0081164	0.0081164	2.28983e-16	No Effect
lthstrl[c]	0	0	0	No Effect
lumirhodopsin[s]	-1.23369	-1.23369	1.9984e-14	No Effect
lut[u]	-2.49985	-2.49985	3.01981e-14	No Effect
lyc[h]	-2.46739	-2.46739	3.01981e-14	No Effect
lys-L[c]	-0.0649312	-0.0649312	1.09635e-15	No Effect
lys-L[m]	8.32667e-16	1.11022e-16	7.21645e-16	No Effect
lystrna[m]	0	0	0	No Effect
mag160[c]	-0.162328	-0.146095	0.0162328	Change
mag180[c]	-0.178561	-0.178561	1.50158e-14	No Effect
mag18111Z[c]	-0.446402	-0.430169	0.0162328	Change
mag1819Z[c]	-0.178561	-0.178561	1.70142e-14	No Effect
malACP[h]	0.227259	0.340889	0.11363	Change
malcoa[c]	-0.486984	-0.486984	9.99201e-16	No Effect
malcoa[h]	-0.470751	-0.470751	0	No Effect
mal-L[c]	-0.0324656	-0.0324656	2.98372e-16	No Effect
mal-L[f]	-0.0324656	-0.0324656	2.01228e-16	No Effect
mal-L[h]	-0.0324656	-0.0324656	1.94289e-16	No Effect
mal-L[m]	-0.0324656	-0.0324656	6.03684e-16	No Effect
mal-L[x]	-0.0324656	-0.0324656	6.03684e-16	No Effect
man[c]	-0.165033	-0.165033	4.996e-15	No Effect
man[h]	-0.165033	-0.165033	4.996e-15	No Effect
man1p[c]	-0.0973968	-0.0973968	1.4988e-15	No Effect
man6p[c]	-0.0973968	-0.0973968	1.4988e-15	No Effect
man6p[h]	-0.229965	-0.229965	4.996e-15	No Effect
meglyxyl[c]	0	0	0	No Effect
meglyxyl[e]	0	0	0	No Effect
melib[h]	-0.246197	-0.246197	7.02216e-15	No Effect
melt[h]	-0.26243	-0.26243	5.9952e-15	No Effect
menecyart[c]	-1.85866	-1.85866	1.9984e-14	No Effect
mercppyr[h]	-0.0486984	-0.0486984	2.98372e-16	No Effect
mercppyr[m]	-4.68996e-16	4.72193e-17	5.16215e-16	No Effect
mergtrol[c]	-1.85866	-1.85866	1.9984e-14	No Effect
metarhodopsin[s]	-1.23369	-1.23369	1.9984e-14	No Effect
methf[c]	-0.0081164	-0.0081164	1.1692e-15	No Effect
methf[h]	-0.0081164	-0.0081164	1.19002e-15	No Effect
methf[m]	-0.0081164	-0.0081164	8.89913e-16	No Effect
methf[x]	-0.0081164	-0.0081164	1.33921e-15	No Effect
met-L[c]	-0.121746	-0.121746	1.9984e-15	No Effect
met-L[m]	-0.121746	-0.121746	1.9984e-15	No Effect
mettrna[c]	-0.121746	-0.121746	1.9984e-15	No Effect
mfecostrl[c]	-1.85866	-1.85866	1.9984e-14	No Effect
mfor[h]	-1.93982	-1.93982	3.9968e-14	No Effect
mg2[c]	0	0	0	No Effect
mg2[e]	0	0	0	No Effect
mg2[h]	0	0	0	No Effect
mg2[u]	0	0	0	No Effect
mgdg1819Z160[h]	-0.665545	-0.665545	3.4972e-14	No Effect
mgdg1819Z1617Z[h]	-0.722359	-0.722359	3.09752e-14	No Effect
mgdg1819Z1619Z[h]	-0.722359	-0.722359	3.09752e-14	No Effect
mgdg1819Z1627Z10Z[h]	-0.779174	-0.779174	2.59792e-14	No Effect
mgdg1819Z1637Z10Z13Z[h]	-0.835989	-0.835989	2.09832e-14	No Effect
mgdg1819Z1644Z7Z10Z13Z[h]	-0.892804	-0.892804	1.69864e-14	No Effect
mgdg1829Z12Z160[h]	-0.722359	-0.722359	3.09752e-14	No Effect
mgdg1829Z12Z1617Z[h]	-0.779174	-0.779174	2.59792e-14	No Effect
mgdg1829Z12Z1619Z[h]	-0.779174	-0.779174	2.59792e-14	No Effect
mgdg1829Z12Z1627Z10Z[h]	-0.835989	-0.835989	2.09832e-14	No Effect
mgdg1829Z12Z1634Z7Z10Z[h]	-0.892804	-0.892804	1.69864e-14	No Effect
mgdg1829Z12Z1637Z10Z13Z[h]	-0.892804	-0.892804	1.69864e-14	No Effect
mgdg1829Z12Z1644Z7Z10Z13Z[h]	-0.949619	-0.949619	1.09912e-14	No Effect
mgdg1839Z12Z15Z160[h]	-0.779174	-0.779174	2.59792e-14	No Effect
mgdg1839Z12Z15Z1627Z10Z[h]	-0.892804	-0.892804	1.59872e-14	No Effect
mgdg1839Z12Z15Z1634Z7Z10Z[h]	-0.949619	-0.949619	1.19904e-14	No Effect
mgdg1839Z12Z15Z1637Z10Z13Z[h]	-0.949619	-0.949619	1.19904e-14	No Effect
mgdg1839Z12Z15Z1644Z7Z10Z13Z[h]	-1.00643	-1.00643	0	No Effect
mhpglu[m]	0	0	0	No Effect
mi12356p[c]	-0.0162328	-0.0162328	4.02456e-16	No Effect
mi13456p[c]	0	0	0	No Effect
mi13456p[n]	-0.568148	-0.568148	1.29896e-14	No Effect
mi1345p[c]	-0.0973968	-0.0973968	3.05311e-16	No Effect
mi1345p[n]	6.16343e-16	3.19335e-17	5.84409e-16	No Effect
mi1346p[c]	-0.11363	-0.11363	9.99201e-16	No Effect
mi134p[c]	-0.0973968	-0.0973968	2.91434e-16	No Effect
mi134p[n]	0	0	0	No Effect
mi1456p[c]	-0.11363	-0.11363	9.99201e-16	No Effect
mi1456p[n]	-0.284074	-0.284074	6.99441e-15	No Effect
mi145p[c]	-0.0973968	-0.0973968	2.91434e-16	No Effect
mi145p[n]	6.16343e-16	3.19335e-17	5.84409e-16	No Effect
mi14p[c]	-0.0973968	-0.0973968	9.02056e-16	No Effect
mi14p[n]	0	0	0	No Effect
mi1p-D[c]	-0.0973968	-0.0973968	1.4988e-15	No Effect
mi3456p[c]	0.0162328	0.0162328	9.71445e-17	No Effect
mi34p[c]	-0.0973968	-0.0973968	9.02056e-16	No Effect
mi34p[n]	6.16343e-16	3.19335e-17	5.84409e-16	No Effect
mi3p-D[c]	-0.0973968	-0.0973968	1.4988e-15	No Effect
mi3p-D[n]	0	0	0	No Effect
mi4p-D[c]	-0.0973968	-0.0973968	1.4988e-15	No Effect
minohp[c]	-0.0162328	-0.0162328	9.71445e-17	No Effect
mlthf[c]	3.62782e-16	1.19666e-16	2.43115e-16	No Effect
mlthf[m]	8.88731e-17	1.19666e-16	3.0793e-17	No Effect
mm[m]	-0.0324656	-0.0324656	6.03684e-16	No Effect
mma[c]	-0.0243492	-0.0243492	7.00828e-16	No Effect
mmsa[m]	-0.0324656	-0.0324656	1.20043e-15	No Effect
mnt[h]	-0.327361	-0.327361	8.99281e-15	No Effect
mppp9[h]	-1.86677	-1.86677	3.9968e-14	No Effect
mppp9me[h]	-1.87489	-1.87489	2.9976e-14	No Effect
mpq[h]	-1.55835	-1.55835	9.99201e-15	No Effect
msa[m]	-0.0162328	-0.0162328	1.29757e-15	No Effect
mthgxl[c]	0	0	0	No Effect
mthgxl[x]	-0.0243492	-0.0243492	3.09822e-15	No Effect
myrsACP[h]	-0.454518	-0.340889	0.11363	Change
na1[c]	-4.77144e-16	-6.35408e-17	4.13603e-16	No Effect
na1[e]	1.39199e-16	-3.16073e-17	1.70806e-16	No Effect
na1[h]	-4.30107e-16	0	4.30107e-16	No Effect
na1[m]	-2.03235e-16	-6.35408e-17	1.39695e-16	No Effect
na1[x]	0	0	0	No Effect
nac[c]	0.146095	0.146095	2.9976e-15	No Effect
nad[c]	-0.284074	-0.284074	6.99441e-15	No Effect
nad[f]	-2.42861e-16	1.38778e-16	3.81639e-16	No Effect
nad[h]	-0.267841	-0.267841	5.9952e-15	No Effect
nad[m]	-0.284074	-0.284074	6.99441e-15	No Effect
nad[n]	-0.284074	-0.284074	6.99441e-15	No Effect
nad[s]	-0.267841	-0.267841	6.99441e-15	No Effect
nad[x]	-0.284074	-0.284074	6.99441e-15	No Effect
nadh[c]	-0.284074	-0.284074	6.99441e-15	No Effect
nadh[f]	0	0	0	No Effect
nadh[h]	-0.284074	-0.284074	6.99441e-15	No Effect
nadh[m]	-0.284074	-0.284074	6.99441e-15	No Effect
nadh[s]	-0.284074	-0.284074	6.99441e-15	No Effect
nadh[x]	-0.284074	-0.284074	6.99441e-15	No Effect
nadp[c]	-0.284074	-0.284074	6.99441e-15	No Effect
nadp[f]	-0.284074	-0.284074	6.99441e-15	No Effect
nadp[h]	-0.284074	-0.284074	6.99441e-15	No Effect
nadp[m]	0	0	0	No Effect
nadp[n]	0	0	0	No Effect
nadp[s]	-0.284074	-0.284074	6.99441e-15	No Effect
nadp[u]	-0.284074	-0.284074	6.99441e-15	No Effect
nadp[x]	-0.284074	-0.284074	6.99441e-15	No Effect
nadph[c]	-0.284074	-0.284074	6.99441e-15	No Effect
nadph[f]	-0.284074	-0.284074	6.99441e-15	No Effect
nadph[h]	-0.300307	-0.300307	8.99281e-15	No Effect
nadph[m]	2.53561e-16	-8.77327e-17	3.41294e-16	No Effect
nadph[n]	0	0	0	No Effect
nadph[s]	-0.300307	-0.300307	8.99281e-15	No Effect
nadph[u]	-0.300307	-0.300307	8.99281e-15	No Effect
nadph[x]	-0.284074	-0.284074	6.99441e-15	No Effect
ncam[c]	0.146095	0.146095	3.9968e-15	No Effect
neoxan[u]	-2.49985	-2.49985	3.01981e-14	No Effect
nh4[c]	6.16343e-16	3.19335e-17	5.84409e-16	No Effect
nh4[e]	0	0	0	No Effect
nh4[h]	5.69306e-16	-3.16073e-17	6.00914e-16	No Effect
nh4[m]	3.42434e-16	3.19335e-17	3.10501e-16	No Effect
nh4[n]	6.16343e-16	3.19335e-17	5.84409e-16	No Effect
nh4[x]	6.16343e-16	3.19335e-17	5.84409e-16	No Effect
nicrns[c]	0	0	0	No Effect
nicrnt[c]	6.16343e-16	3.19335e-17	5.84409e-16	No Effect
nicrnt[n]	0	0	0	No Effect
nmn[c]	1.94166e-15	3.63751e-17	1.90528e-15	No Effect
nmn[n]	2.22045e-16	0	2.22045e-16	No Effect
no[c]	-2.97544e-16	4.1917e-17	3.39461e-16	No Effect
no[h]	0	0	0	No Effect
no2[c]	-2.28758e-16	-1.62241e-16	6.65163e-17	No Effect
no2[e]	-2.28758e-16	-1.62241e-16	6.65163e-17	No Effect
no2[h]	-2.28758e-16	-1.62241e-16	6.65163e-17	No Effect
no3[c]	-4.25825e-16	0	4.25825e-16	No Effect
no3[e]	-4.25825e-16	0	4.25825e-16	No Effect
norsp[h]	-5.18959e-16	1.98053e-16	7.17012e-16	No Effect
NPmehis[c]	0	0	0	No Effect
nwharg[c]	-0.0649312	-0.0649312	0	No Effect
o2[c]	-5.18959e-16	0	5.18959e-16	No Effect
o2[e]	-5.18959e-16	0	5.18959e-16	No Effect
o2[h]	-5.18959e-16	-1.79911e-31	5.18959e-16	No Effect
o2[m]	-5.18959e-16	-2.93834e-31	5.18959e-16	No Effect
o2[n]	-5.18959e-16	0	5.18959e-16	No Effect
o2[u]	-5.18959e-16	-1.79911e-31	5.18959e-16	No Effect
o2[x]	-5.18959e-16	-2.78669e-31	5.18959e-16	No Effect
o2D[u]	0	0	0	No Effect
oaa[c]	-0.0324656	-0.0324656	2.98372e-16	No Effect
oaa[f]	-0.0324656	-0.0324656	2.98372e-16	No Effect
oaa[h]	-0.0162328	-0.0162328	8.98587e-16	No Effect
oaa[m]	-0.0324656	-0.0324656	5.96745e-16	No Effect
oaa[x]	-0.0324656	-0.0324656	2.01228e-16	No Effect
obfool[c]	-1.85866	-1.85866	1.9984e-14	No Effect
oc2coa[m]	-0.519449	-0.519449	4.996e-15	No Effect
oc2coa[x]	-0.519449	-0.519449	5.9952e-15	No Effect
ocACP[h]	-0.11363	0	0.11363	Change
occoa[m]	-0.519449	-0.519449	4.996e-15	No Effect
occoa[x]	-0.519449	-0.519449	6.99441e-15	No Effect
ocdca[c]	-0.162328	-0.162328	1.40166e-14	No Effect
ocdca[h]	-0.162328	-0.162328	1.40166e-14	No Effect
ocdcaACP[h]	0.0243492	0.081164	0.0568148	Change
ocdccoa[c]	-0.616846	-0.616846	1.19904e-14	No Effect
ocdce9a[c]	-0.162328	-0.162328	1.50158e-14	No Effect
ocdce9a[h]	-0.162328	-0.162328	1.50158e-14	No Effect
ocdce9coa[c]	-0.616846	-0.616846	1.39888e-14	No Effect
ocdcea[c]	-0.413936	-0.413936	9.99201e-15	No Effect
ocdcea[h]	-0.413936	-0.413936	9.99201e-15	No Effect
ocdcecoa[c]	-0.868455	-0.868455	8.99281e-15	No Effect
octa[h]	-0.357122	-0.357122	2.9976e-15	No Effect
octe9ACP[h]	-0.0324656	0.081164	0.11363	Change
octeACP[h]	-0.170444	-0.0568148	0.11363	Change
od2coa[c]	-0.616846	-0.616846	1.19904e-14	No Effect
omppp9me[h]	-1.90735	-1.90735	4.01901e-14	No Effect
orn[c]	-0.0649312	-0.0649312	1.09635e-15	No Effect
orn[e]	-0.0649312	-0.0649312	1.09635e-15	No Effect
orn[h]	-8.04912e-16	-1.38778e-17	7.91034e-16	No Effect
orn[m]	-0.0649312	-0.0649312	1.09635e-15	No Effect
orot[c]	-0.0324656	-0.0324656	9.71445e-17	No Effect
orot[m]	-0.0324656	-0.0324656	9.71445e-17	No Effect
orot5p[c]	-0.178561	-0.178561	1.9984e-15	No Effect
oxa[m]	6.84869e-16	6.38669e-17	6.21002e-16	No Effect
pa[c]	-0.162328	-0.162328	1.20182e-14	No Effect
pa160[h]	-0.616846	-0.616846	3.09752e-14	No Effect
pa16018111Z[c]	-0.576264	-0.576264	2.40918e-14	No Effect
pa1601819Z[c]	-0.324656	-0.324656	2.80331e-14	No Effect
pa1601819Z[h]	-0.649312	-0.649312	3.39728e-14	No Effect
pa1801819Z[c]	-0.357122	-0.357122	3.00315e-14	No Effect
pa1801819Z[h]	-0.624963	-0.681777	0.0568148	Change
pa1801829Z12Z[c]	-0.389587	-0.389587	2.70339e-14	No Effect
pa1801835Z9Z12Z[c]	-0.389587	-0.389587	2.60347e-14	No Effect
pa1801845Z9Z12Z15Z[c]	-0.389587	-0.389587	2.50355e-14	No Effect
pa18111Z160[c]	-0.576264	-0.576264	2.40918e-14	No Effect
pa18111Z160[h]	-0.787291	-0.787291	2.59792e-14	No Effect
pa18111Z18111Z[c]	-0.860338	-0.860338	2.09832e-14	No Effect
pa18111Z1819Z[c]	-0.60873	-0.60873	2.59792e-14	No Effect
pa18111Z1819Z[h]	-0.819756	-0.819756	2.9976e-14	No Effect
pa18111Z1829Z12Z[c]	-0.641195	-0.641195	2.39808e-14	No Effect
pa18111Z1835Z9Z12Z[c]	-0.641195	-0.641195	2.29816e-14	No Effect
pa18111Z1845Z9Z12Z15Z[c]	-0.641195	-0.641195	2.09832e-14	No Effect
pa1819Z160[c]	-0.324656	-0.324656	2.80331e-14	No Effect
pa1819Z160[h]	-0.649312	-0.649312	3.39728e-14	No Effect
pa1819Z1619Z[h]	-0.706127	-0.706127	2.89768e-14	No Effect
pa1819Z18111Z[c]	-0.60873	-0.60873	2.59792e-14	No Effect
pa1819Z18111Z[h]	-0.819756	-0.819756	2.9976e-14	No Effect
pa1819Z1819Z[c]	-0.357122	-0.357122	3.20299e-14	No Effect
pa1819Z1819Z[h]	-0.681777	-0.681777	3.70814e-14	No Effect
pa1819Z1829Z12Z[c]	-0.389587	-0.389587	2.90323e-14	No Effect
pa1819Z1835Z9Z12Z[c]	-0.389587	-0.389587	2.80331e-14	No Effect
pa1819Z1845Z9Z12Z15Z[c]	-0.389587	-0.389587	2.70339e-14	No Effect
pa1829Z12Z1835Z9Z12Z[c]	-0.389587	-0.389587	2.70339e-14	No Effect
pacoa[c]	-0.616846	-0.616846	9.99201e-15	No Effect
pail18111Z160[c]	-0.689894	-0.689894	2.69784e-14	No Effect
pail18111Z160[e]	-0.706127	-0.706127	2.59792e-14	No Effect
pail1819Z160[c]	-0.438285	-0.438285	3.10307e-14	No Effect
pail1819Z160[e]	-0.454518	-0.454518	3.20299e-14	No Effect
palmACP[h]	-1.47538e-14	0.11363	0.11363	Change
pan4p[c]	-0.154212	-0.154212	3.9968e-15	No Effect
pant-R[c]	-0.040582	-0.040582	4.00374e-15	No Effect
pant-R[m]	-0.040582	-0.040582	3.60129e-15	No Effect
pant-R[n]	-0.040582	-0.040582	3.59435e-15	No Effect
pap[c]	-0.284074	-0.284074	6.99441e-15	No Effect
pap[h]	-0.332772	-0.332772	5.9952e-15	No Effect
paps[c]	-0.284074	-0.284074	6.99441e-15	No Effect
paps[h]	-0.332772	-0.332772	4.996e-15	No Effect
paps[m]	-0.284074	-0.284074	5.9952e-15	No Effect
pccu1p[u]	0	0	0	No Effect
pccu2p[u]	-5.69306e-16	0	5.69306e-16	No Effect
pcdme[h]	-0.470751	-0.470751	4.996e-15	No Effect
pchlda[h]	-1.93982	-1.93982	2.9976e-14	No Effect
pdp[h]	-1.29862	-1.29862	9.99201e-15	No Effect
pdp[u]	-1.29862	-1.29862	9.99201e-15	No Effect
pdx5p[c]	0	-0.0162328	0.0162328	Change
pe1801819Z[c]	-0.40582	-0.40582	3.10307e-14	No Effect
pe1801819Z[e]	-0.422053	-0.422053	3.00315e-14	No Effect
pe1801829Z12Z[c]	-0.40582	-0.40582	3.00315e-14	No Effect
pe1801829Z12Z[e]	-0.422053	-0.422053	2.90323e-14	No Effect
pe1801835Z9Z12Z[c]	-0.40582	-0.40582	2.80331e-14	No Effect
pe1801835Z9Z12Z[e]	-0.422053	-0.422053	2.80331e-14	No Effect
pe1801845Z9Z12Z15Z[c]	-0.40582	-0.40582	2.70339e-14	No Effect
pe1801845Z9Z12Z15Z[e]	-0.422053	-0.422053	2.60347e-14	No Effect
pe18111Z1819Z[c]	-0.657428	-0.657428	2.79776e-14	No Effect
pe18111Z1819Z[e]	-0.673661	-0.673661	2.79776e-14	No Effect
pe18111Z1829Z12Z[c]	-0.657428	-0.657428	2.59792e-14	No Effect
pe18111Z1829Z12Z[e]	-0.673661	-0.673661	2.59792e-14	No Effect
pe18111Z1835Z9Z12Z[c]	-0.657428	-0.657428	2.498e-14	No Effect
pe18111Z1835Z9Z12Z[e]	-0.673661	-0.673661	2.498e-14	No Effect
pe18111Z1845Z9Z12Z15Z[c]	-0.657428	-0.657428	2.29816e-14	No Effect
pe18111Z1845Z9Z12Z15Z[e]	-0.673661	-0.673661	2.39808e-14	No Effect
pe1819Z1819Z[c]	-0.40582	-0.40582	3.30291e-14	No Effect
pe1819Z1819Z[e]	-0.422053	-0.422053	3.20299e-14	No Effect
pe1819Z1829Z12Z[c]	-0.40582	-0.40582	3.10307e-14	No Effect
pe1819Z1829Z12Z[e]	-0.422053	-0.422053	3.10307e-14	No Effect
pe1819Z1835Z9Z12Z[c]	-0.40582	-0.40582	3.00315e-14	No Effect
pe1819Z1835Z9Z12Z[e]	-0.422053	-0.422053	2.90323e-14	No Effect
pe1819Z1845Z9Z12Z15Z[c]	-0.40582	-0.40582	2.90323e-14	No Effect
pe1819Z1845Z9Z12Z15Z[e]	-0.422053	-0.422053	2.80331e-14	No Effect
pe1829Z12Z1835Z9Z12Z[c]	-0.40582	-0.40582	2.90323e-14	No Effect
pe1829Z12Z1835Z9Z12Z[e]	-0.422053	-0.422053	2.80331e-14	No Effect
pep[c]	-0.0324656	-0.0324656	4.996e-16	No Effect
pep[f]	0	0	0	No Effect
pep[h]	-0.0973968	-0.0973968	1.4988e-15	No Effect
pep[m]	-0.0324656	-0.0324656	7.00828e-16	No Effect
pg18111Z160[c]	-0.624963	-0.624963	2.498e-14	No Effect
pg18111Z160[e]	-0.641195	-0.641195	2.498e-14	No Effect
pg18111Z160[h]	-0.868455	-0.868455	2.79776e-14	No Effect
pg18111Z1613E[h]	-0.925269	-0.925269	2.29816e-14	No Effect
pg1819Z160[c]	-0.373354	-0.373354	3.10307e-14	No Effect
pg1819Z160[e]	-0.389587	-0.389587	3.00315e-14	No Effect
pg1819Z160[h]	-0.730476	-0.730476	3.4972e-14	No Effect
pg1819Z1613E[h]	-0.787291	-0.787291	2.9976e-14	No Effect
pg1829Z12Z160[h]	-0.787291	-0.787291	2.9976e-14	No Effect
pg1829Z12Z1613E[h]	-0.844105	-0.844105	2.60902e-14	No Effect
pg1839Z12Z15Z160[h]	-0.844105	-0.844105	2.60902e-14	No Effect
pg1839Z12Z15Z1613E[h]	-0.90092	-0.90092	2.09832e-14	No Effect
pgp18111Z160[c]	-0.624963	-0.624963	2.59792e-14	No Effect
pgp18111Z160[e]	-0.641195	-0.641195	2.59792e-14	No Effect
pgp18111Z160[h]	-0.933386	-0.933386	2.89768e-14	No Effect
pgp1819Z160[c]	-0.373354	-0.373354	3.10307e-14	No Effect
pgp1819Z160[e]	-0.389587	-0.389587	3.00315e-14	No Effect
pgp1819Z160[h]	-0.795407	-0.795407	3.59712e-14	No Effect
phe-L[c]	-0.146095	-0.146095	2.9976e-15	No Effect
phe-L[h]	-0.146095	-0.146095	2.9976e-15	No Effect
phe-L[m]	4.71845e-16	-4.16334e-17	5.13478e-16	No Effect
pheme[c]	-1.86677	-1.86677	3.9968e-14	No Effect
pheme[h]	-1.86677	-1.86677	3.9968e-14	No Effect
pheme[m]	-1.86677	-1.86677	3.9968e-14	No Effect
phen[c]	6.16343e-16	3.19335e-17	5.84409e-16	No Effect
phetrna[m]	-3.88578e-16	-1.66533e-16	2.22045e-16	No Effect
phom[c]	0.0324656	0.0324656	2.79637e-15	No Effect
phom[h]	-0.129862	-0.129862	9.99201e-16	No Effect
photon298[c]	0	0	0	No Effect
photon437[u]	-0.0081164	-0.0081164	3.40006e-16	No Effect
photon438[u]	0	0	0	No Effect
photon450[h]	0	0	0	No Effect
photon490[s]	0	-1.38778e-16	1.38778e-16	No Effect
photon646[h]	0	0	0	No Effect
photon673[u]	0	0	0	No Effect
photon680[u]	-0.0081164	-0.0081164	3.40006e-16	No Effect
photonVis[e]	0	0	0	No Effect
phphbda[h]	-1.93982	-1.93982	3.9968e-14	No Effect
phphtna[u]	-3.22221	-3.22221	4.9738e-14	No Effect
phpyr[c]	-0.146095	-0.146095	2.9976e-15	No Effect
phpyr[h]	-0.129862	-0.129862	3.9968e-15	No Effect
phpyr[m]	0	0	0	No Effect
phytfl[h]	0	0	0	No Effect
phyto[h]	-2.46739	-2.46739	3.01981e-14	No Effect
phytol[h]	-1.28239	-1.28239	1.02141e-14	No Effect
pi[c]	6.16343e-16	3.19335e-17	5.84409e-16	No Effect
pi[e]	0	0	0	No Effect
pi[f]	0	0	0	No Effect
pi[h]	-0.0649312	-0.0649312	4.02456e-16	No Effect
pi[m]	3.42434e-16	3.19335e-17	3.10501e-16	No Effect
pi[n]	6.16343e-16	3.19335e-17	5.84409e-16	No Effect
pi[x]	1.39199e-16	-3.13387e-17	1.70538e-16	No Effect
pmtcoa[c]	-0.584381	-0.584381	1.09912e-14	No Effect
pmtcoa[h]	-0.584381	-0.584381	1.09912e-14	No Effect
pmtcoa[m]	-0.584381	-0.584381	1.09912e-14	No Effect
pmtcoa[s]	-0.584381	-0.584381	1.09912e-14	No Effect
pmtcoa[x]	-0.600613	-0.600613	1.09912e-14	No Effect
pnto-R[c]	-0.0730476	-0.0730476	5.30131e-15	No Effect
pnto-R[m]	-0.0730476	-0.0730476	5.30131e-15	No Effect
ppa[c]	-0.0324656	-0.0324656	1.09635e-15	No Effect
ppa[h]	-0.0324656	-0.0324656	1.09635e-15	No Effect
ppa[m]	-0.0324656	-0.0324656	1.09635e-15	No Effect
ppad[m]	-0.31654	-0.31654	4.996e-15	No Effect
ppap[h]	-0.0973968	-0.0973968	2.09555e-15	No Effect
ppap[m]	-0.0324656	-0.0324656	1.20043e-15	No Effect
ppbng[h]	-0.389587	-0.389587	5.9952e-15	No Effect
ppcoa[c]	-0.486984	-0.486984	9.99201e-16	No Effect
ppcoa[h]	-0.486984	-0.486984	9.99201e-16	No Effect
ppcoa[m]	-0.486984	-0.486984	0	No Effect
ppcoa[n]	0	0	0	No Effect
ppgpp[c]	-0.31654	-0.31654	6.99441e-15	No Effect
pphn[c]	-0.146095	-0.146095	2.9976e-15	No Effect
pphn[h]	-0.146095	-0.146095	2.9976e-15	No Effect
ppi[c]	-0.0162328	-0.0162328	9.99201e-16	No Effect
ppi[h]	-0.0162328	-0.0162328	1.50227e-15	No Effect
ppi[m]	5.58544e-16	6.38669e-17	4.94677e-16	No Effect
ppi[n]	0	0	0	No Effect
ppi[u]	-0.0162328	-0.0162328	1.50227e-15	No Effect
ppp9[h]	-1.86677	-1.86677	3.9968e-14	No Effect
pppg9[h]	-1.91547	-1.91547	2.9976e-14	No Effect
pq[h]	0	0	0	No Effect
pq[u]	0	0	0	No Effect
pqh2[h]	-2.46739	-2.46739	3.01981e-14	No Effect
pqh2[u]	0	0	0	No Effect
pqqox[x]	0	0	0	No Effect
pqqrd[x]	-1.39199e-16	3.13387e-17	1.70538e-16	No Effect
pram[c]	-0.162328	-0.162328	9.99201e-16	No Effect
pram[h]	-0.259725	-0.259725	2.9976e-15	No Effect
pran[h]	-0.389587	-0.389587	4.996e-15	No Effect
prbamp[c]	-0.430169	-0.430169	4.996e-15	No Effect
prbamp[h]	0	9.90266e-17	9.90266e-17	No Effect
prbatp[c]	-0.446402	-0.446402	3.9968e-15	No Effect
prbatp[h]	-0.0162328	-0.0162328	1.00267e-15	No Effect
prfp[c]	-0.430169	-0.430169	4.996e-15	No Effect
prfp[h]	0	0	0	No Effect
prlp[c]	-0.430169	-0.430169	4.996e-15	No Effect
prlp[h]	0	0	0	No Effect
pro-L[c]	-0.0649312	-0.0649312	1.80411e-15	No Effect
pro-L[m]	-0.0649312	-0.0649312	2.10942e-15	No Effect
protds[h]	0	0	0	No Effect
protdt[h]	-0.0162328	-0.0162328	7.00828e-16	No Effect
protrna[c]	-0.0649312	-0.0649312	2.20657e-15	No Effect
prpncoa[c]	-0.486984	-0.486984	9.99201e-16	No Effect
prpncoa[m]	-0.486984	-0.486984	1.9984e-15	No Effect
prpncoa[n]	0	0	0	No Effect
prpp[c]	-0.162328	-0.162328	9.99201e-16	No Effect
prpp[h]	-0.275958	-0.275958	3.9968e-15	No Effect
pser-L[h]	-0.0973968	-0.0973968	9.99201e-16	No Effect
psphings[c]	-0.146095	-0.146095	1.50158e-14	No Effect
psqldp[c]	-1.86677	-1.86677	1.9984e-14	No Effect
ptrc[c]	-0.0649312	-0.0649312	1.69309e-15	No Effect
ptrc[h]	-0.0649312	-0.0649312	1.69309e-15	No Effect
ptrc[m]	-0.0649312	-0.0649312	4.02456e-16	No Effect
ptth[c]	-0.137979	-0.137979	4.996e-15	No Effect
pyam5p[c]	0	0	0	No Effect
pydam[c]	-6.16343e-16	-3.19335e-17	5.84409e-16	No Effect
pydx[c]	0.0162328	-2.01346e-18	0.0162328	Change
pydx5p[c]	0.0162328	2.992e-17	0.0162328	Change
pydxn[c]	0.0162328	-1.52757e-16	0.0162328	Change
pyphphbda[h]	0	0	0	No Effect
pyr[c]	-0.0162328	-0.0162328	1.19696e-15	No Effect
pyr[f]	-0.0162328	-0.0162328	1.19696e-15	No Effect
pyr[h]	-0.0162328	-0.0162328	1.19696e-15	No Effect
pyr[m]	-0.0162328	-0.0162328	1.19696e-15	No Effect
pyr[x]	-0.0324656	-0.0324656	5.96745e-16	No Effect
q8[m]	0	0	0	No Effect
q8h2[m]	-1.18451e-15	-2.01346e-18	1.18249e-15	No Effect
r1p[c]	-0.146095	-0.146095	1.9984e-15	No Effect
r1p[h]	-0.146095	-0.146095	1.9984e-15	No Effect
r5p[c]	-0.146095	-0.146095	1.9984e-15	No Effect
r5p[h]	-0.146095	-0.146095	1.9984e-15	No Effect
raffin[c]	-0.259725	-0.259725	6.99441e-15	No Effect
raffin[h]	-0.411231	-0.411231	1.09912e-14	No Effect
rb15bp[h]	0	0	0	No Effect
rdmbzi[c]	0	0	0	No Effect
retac[s]	-1.26616	-1.26616	9.99201e-15	No Effect
retinal[h]	-1.23369	-1.23369	9.99201e-15	No Effect
retinal[s]	-1.23369	-1.23369	9.99201e-15	No Effect
retinal-11-cis[s]	-1.23369	-1.23369	9.99201e-15	No Effect
retinol[s]	-1.24993	-1.24993	9.99201e-15	No Effect
retinol-cis-11[s]	-1.24993	-1.24993	9.99201e-15	No Effect
retpalm[s]	-1.37979	-1.37979	2.9976e-14	No Effect
retpalm-11-cis[s]	-1.37979	-1.37979	2.9976e-14	No Effect
rhodopsin[s]	-1.23369	-1.23369	1.9984e-14	No Effect
rib-D[c]	-0.129862	-0.129862	2.9976e-15	No Effect
rib-D[e]	-0.129862	-0.129862	2.9976e-15	No Effect
ribflv[c]	-6.16343e-16	-3.19335e-17	5.84409e-16	No Effect
ribflv[h]	-6.16343e-16	-3.19335e-17	5.84409e-16	No Effect
rnam[c]	1.32531e-15	4.44168e-18	1.32087e-15	No Effect
ru5p-D[c]	0.081164	0.0649312	0.0162328	Change
ru5p-D[h]	-0.146095	-0.146095	1.9984e-15	No Effect
s[e]	0	0	0	No Effect
s17bp[h]	-0.243492	-0.243492	2.9976e-15	No Effect
s7p[h]	-0.178561	-0.178561	2.9976e-15	No Effect
sbt-D[h]	-0.181266	-0.181266	3.9968e-15	No Effect
scl[h]	-1.55835	-1.55835	1.9984e-14	No Effect
scys-L[c]	-0.0162328	-0.0162328	1.97758e-16	No Effect
scys-L[h]	-0.0486984	-0.0486984	7.97973e-16	No Effect
scys-L[m]	-0.0162328	-0.0162328	1.20043e-15	No Effect
sdhlam[m]	0.129862	0.129862	9.99201e-16	No Effect
seahcys[c]	-0.235376	-0.235376	7.99361e-15	No Effect
sectrna[m]	-0.0162328	-0.0162328	2.00187e-15	No Effect
selcys[c]	0	0	0	No Effect
selcys[h]	-0.0162328	-0.0162328	0	No Effect
selcys[m]	-0.0162328	-0.0162328	1.20043e-15	No Effect
selcyst[c]	0.0324656	0.0324656	1.70003e-15	No Effect
selcyst[h]	0	0	0	No Effect
selhcys[c]	0.0486984	0.0486984	2.90046e-15	No Effect
selhcys[h]	0.0162328	0.0162328	1.29757e-15	No Effect
seln[c]	2.12798e-16	-3.9269e-17	2.52067e-16	No Effect
seln[h]	0	0	0	No Effect
seln[m]	-3.95517e-16	-3.46945e-17	3.60822e-16	No Effect
selnp[m]	-1.11022e-16	-5.55112e-17	5.55112e-17	No Effect
selt[c]	0.0486984	0.0486984	1.79717e-15	No Effect
selt[e]	0.0486984	0.0486984	1.79717e-15	No Effect
selt[m]	0.0486984	0.0486984	1.79717e-15	No Effect
ser-L[c]	-0.0162328	-0.0162328	6.00214e-16	No Effect
ser-L[h]	-0.0162328	-0.0162328	6.00214e-16	No Effect
ser-L[m]	-0.0162328	-0.0162328	8.98587e-16	No Effect
sertrna[c]	-0.0162328	-0.0162328	1.09981e-15	No Effect
sertrna-LPAREN-sec-RPAREN[m]	-0.0162328	-0.0162328	1.60288e-15	No Effect
sheme[h]	-1.55835	-1.55835	1.9984e-14	No Effect
skm[h]	-0.11363	-0.11363	1.9984e-15	No Effect
skm5p[h]	-0.178561	-0.178561	1.9984e-15	No Effect
so4[c]	6.16343e-16	3.19335e-17	5.84409e-16	No Effect
so4[e]	0	0	0	No Effect
so4[m]	3.42434e-16	3.19335e-17	3.10501e-16	No Effect
so4[n]	6.16343e-16	3.19335e-17	5.84409e-16	No Effect
sph1p[c]	-0.146095	-0.146095	1.40166e-14	No Effect
sphgn[c]	-0.146095	-0.146095	1.40166e-14	No Effect
sphings[c]	-0.146095	-0.146095	1.30174e-14	No Effect
sphs1p[c]	-0.146095	-0.146095	1.20182e-14	No Effect
spmd[c]	-0.211026	-0.211026	2.9976e-15	No Effect
spmd[h]	0.146095	0.146095	1.9984e-15	No Effect
spmd[m]	-0.211026	-0.211026	1.9984e-15	No Effect
sprm[h]	0	0	0	No Effect
sqdg160[h]	-0.633079	-0.633079	3.29736e-14	No Effect
sqdg18111Z160[c]	-0.803523	-0.803523	2.79776e-14	No Effect
sqdg18111Z160[h]	-0.803523	-0.803523	2.79776e-14	No Effect
sqdg1819Z160[c]	-0.665545	-0.665545	3.4972e-14	No Effect
sqdg1819Z160[h]	-0.665545	-0.665545	3.4972e-14	No Effect
sqdg1829Z12Z160[h]	-0.722359	-0.722359	3.09752e-14	No Effect
sqdg1839Z12Z15Z160[h]	-0.779174	-0.779174	2.59792e-14	No Effect
sql[c]	-1.85054	-1.85054	1.9984e-14	No Effect
Ssq23epx[c]	-1.85054	-1.85054	1.9984e-14	No Effect
starch300[h]	0	0	0	No Effect
stc[h]	-0.492395	-0.492395	1.30451e-14	No Effect
stcoa[c]	-0.616846	-0.616846	1.19904e-14	No Effect
suc6p[c]	-0.178561	-0.178561	3.9968e-15	No Effect
sucald[c]	0	0	0	No Effect
succ[c]	-0.0324656	-0.0324656	1.70003e-15	No Effect
succ[e]	-0.0324656	-0.0324656	1.70003e-15	No Effect
succ[h]	-1.18742e-15	-7.27495e-18	1.18015e-15	No Effect
succ[m]	-0.0324656	-0.0324656	1.9984e-15	No Effect
succoa[m]	-0.486984	-0.486984	9.99201e-16	No Effect
suchms[c]	0	0	0	No Effect
suchms[h]	-0.0649312	-0.0649312	9.02056e-16	No Effect
sucr[c]	-0.178561	-0.178561	4.996e-15	No Effect
sucr[h]	-0.330067	-0.330067	8.99281e-15	No Effect
sucsal[h]	-0.0162328	-0.0162328	1.09981e-15	No Effect
sucsal[m]	-0.0324656	-0.0324656	2.498e-15	No Effect
t3c11vaceACP[h]	-0.154212	-0.040582	0.11363	Change
tag16018111Z160[c]	-0.706127	-0.706127	3.69704e-14	No Effect
tag16018111Z180[c]	-0.738592	-0.738592	3.89688e-14	No Effect
tag16018111Z18111Z[c]	-0.990201	-0.990201	3.4972e-14	No Effect
tag16018111Z1819Z[c]	-0.738592	-0.738592	3.9968e-14	No Effect
tag16018111Z1835Z9Z12Z[c]	-0.738592	-0.738592	3.69704e-14	No Effect
tag16018111Z1845Z9Z12Z15Z[c]	-0.738592	-0.738592	3.59712e-14	No Effect
tag1601819Z160[c]	-0.454518	-0.454518	4.20219e-14	No Effect
tag1601819Z180[c]	-0.486984	-0.486984	4.30211e-14	No Effect
tag1601819Z18111Z[c]	-0.738592	-0.738592	3.9968e-14	No Effect
tag1601819Z1819Z[c]	-0.486984	-0.486984	4.50195e-14	No Effect
tag1601819Z1835Z9Z12Z[c]	-0.486984	-0.486984	4.20219e-14	No Effect
tag1601819Z1845Z9Z12Z15Z[c]	-0.486984	-0.486984	4.10227e-14	No Effect
tag1801819Z160[c]	-0.486984	-0.486984	4.30211e-14	No Effect
tag1801819Z180[c]	-0.519449	-0.519449	4.50751e-14	No Effect
tag1801819Z18111Z[c]	-0.771058	-0.771058	4.09672e-14	No Effect
tag1801819Z1819Z[c]	-0.519449	-0.519449	4.60743e-14	No Effect
tag1801819Z1835Z9Z12Z[c]	-0.519449	-0.519449	4.40759e-14	No Effect
tag1801819Z1845Z9Z12Z15Z[c]	-0.519449	-0.519449	4.30767e-14	No Effect
tag18111Z18111Z160[c]	-0.990201	-0.990201	3.4972e-14	No Effect
tag18111Z18111Z180[c]	-1.02267	-1.02267	3.01981e-14	No Effect
tag18111Z18111Z18111Z[c]	-1.27427	-1.27427	3.9968e-14	No Effect
tag18111Z18111Z1819Z[c]	-1.02267	-1.02267	4.01901e-14	No Effect
tag18111Z18111Z1835Z9Z12Z[c]	-1.02267	-1.02267	3.01981e-14	No Effect
tag18111Z18111Z1845Z9Z12Z15Z[c]	-1.02267	-1.02267	3.01981e-14	No Effect
tag18111Z1819Z160[c]	-0.738592	-0.738592	3.9968e-14	No Effect
tag18111Z1819Z180[c]	-0.771058	-0.771058	4.09672e-14	No Effect
tag18111Z1819Z18111Z[c]	-1.02267	-1.02267	4.01901e-14	No Effect
tag18111Z1819Z1819Z[c]	-0.771058	-0.771058	4.29656e-14	No Effect
tag18111Z1819Z1835Z9Z12Z[c]	-0.771058	-0.771058	3.9968e-14	No Effect
tag18111Z1819Z1845Z9Z12Z15Z[c]	-0.771058	-0.771058	3.89688e-14	No Effect
tag1819Z18111Z160[c]	-0.738592	-0.738592	3.9968e-14	No Effect
tag1819Z18111Z180[c]	-0.771058	-0.771058	4.09672e-14	No Effect
tag1819Z18111Z18111Z[c]	-1.02267	-1.02267	4.01901e-14	No Effect
tag1819Z18111Z1819Z[c]	-0.771058	-0.771058	4.29656e-14	No Effect
tag1819Z18111Z1835Z9Z12Z[c]	-0.771058	-0.771058	3.9968e-14	No Effect
tag1819Z18111Z1845Z9Z12Z15Z[c]	-0.771058	-0.771058	3.89688e-14	No Effect
tag1819Z1819Z160[c]	-0.486984	-0.486984	4.50195e-14	No Effect
tag1819Z1819Z180[c]	-0.519449	-0.519449	4.70735e-14	No Effect
tag1819Z1819Z18111Z[c]	-0.771058	-0.771058	4.29656e-14	No Effect
tag1819Z1819Z1819Z[c]	-0.519449	-0.519449	4.80727e-14	No Effect
tag1819Z1819Z1835Z9Z12Z[c]	-0.519449	-0.519449	4.50751e-14	No Effect
tag1819Z1819Z1845Z9Z12Z15Z[c]	-0.519449	-0.519449	4.30767e-14	No Effect
td2coa[m]	-0.568148	-0.568148	9.99201e-15	No Effect
td2coa[x]	-0.568148	-0.584381	0.0162328	Change
tdcoa[m]	-0.568148	-0.568148	9.99201e-15	No Effect
tdcoa[x]	-0.584381	-0.584381	8.99281e-15	No Effect
tddec2eACP[h]	-0.324656	-0.211026	0.11363	Change
tdec2eACP[h]	-0.211026	-0.0973968	0.11363	Change
tega[c]	0	0	0	No Effect
tega[e]	0	0	0	No Effect
tfenfe2[h]	-0.0162328	-0.0162328	8.98587e-16	No Effect
tfenfe3[h]	0	0	0	No Effect
tgua[c]	0	0	0	No Effect
tgua[e]	0	0	0	No Effect
thcys[h]	0	0	0	No Effect
thdp[c]	-0.0649312	-0.0649312	4.996e-16	No Effect
thex2eACP[h]	0.0162328	0.129862	0.11363	Change
thf[c]	0.0081164	0.0081164	1.10155e-15	No Effect
thf[h]	0	0	0	No Effect
thf[m]	0.0081164	0.0081164	8.30933e-16	No Effect
thfglu[c]	-0.040582	-0.040582	5.96745e-16	No Effect
thmpp[h]	0.081164	0.081164	2.20657e-15	No Effect
thmpp[m]	0.0162328	0.0162328	1.4988e-15	No Effect
thr-L[c]	-0.0649312	-0.0649312	1.09635e-15	No Effect
thr-L[h]	-0.0649312	-0.0649312	1.09635e-15	No Effect
thr-L[m]	-0.0649312	-0.0649312	7.91034e-16	No Effect
thrtrna[c]	-0.0649312	-0.0649312	6.93889e-16	No Effect
thrtrna[m]	-0.0649312	-0.0649312	0	No Effect
thymd[c]	-0.186677	-0.186677	3.9968e-15	No Effect
tmrs2eACP[h]	-0.438285	-0.324656	0.11363	Change
toct2eACP[h]	-0.0973968	0.0162328	0.11363	Change
toctd2eACP[h]	0.040582	0.0973968	0.0568148	Change
tpalm2eACP[h]	-0.551915	-0.438285	0.11363	Change
trdox[c]	0	0	0	No Effect
trdox[h]	0	0	0	No Effect
trdrd[c]	-4.1397e-16	-1.94884e-16	2.19085e-16	No Effect
trdrd[h]	-0.0162328	-0.0162328	6.00214e-16	No Effect
tre[c]	-0.162328	-0.162328	3.9968e-15	No Effect
tre6p[c]	-0.162328	-0.162328	3.9968e-15	No Effect
tre6p[n]	0	0	0	No Effect
trnaala[m]	0	0	0	No Effect
trnaarg[c]	0	0	0	No Effect
trnaasn[m]	0	0	0	No Effect
trnaasp[m]	0	0	0	No Effect
trnacys[c]	0	0	0	No Effect
trnagln[c]	0	0	0	No Effect
trnaglu[c]	0	0	0	No Effect
trnaglu[h]	0.178561	0.178561	3.9968e-15	No Effect
trnagly[c]	0	0	0	No Effect
trnagly[m]	0	0	0	No Effect
trnahis[c]	0	0	0	No Effect
trnaile[c]	0	0	0	No Effect
trnaleu[c]	0.0324656	0.0324656	4.996e-15	No Effect
trnalys[m]	0	0	0	No Effect
trnamet[c]	0	0	0	No Effect
trnaphe[m]	0	0	0	No Effect
trnapro[c]	0	0	0	No Effect
trnasecys[m]	0	0	0	No Effect
trnaser[c]	0	0	0	No Effect
trnathr[c]	0	0	0	No Effect
trnathr[m]	0	0	0	No Effect
trnatrp[c]	0.357122	0.357122	5.9952e-15	No Effect
trnatyr[c]	0.211026	0.211026	3.9968e-15	No Effect
trnaval[c]	0.0324656	0.0324656	2.60209e-15	No Effect
trnaval[h]	0.146095	0.146095	4.996e-15	No Effect
trp-L[c]	-0.357122	-0.357122	4.996e-15	No Effect
trp-L[h]	-0.357122	-0.357122	4.996e-15	No Effect
trptrna[c]	0	0	0	No Effect
tsul[c]	-0.0162328	-0.0162328	9.99201e-16	No Effect
tsul[e]	-0.0162328	-0.0162328	9.99201e-16	No Effect
tsul[h]	-0.0324656	-0.0324656	1.40166e-15	No Effect
tsul[m]	0	0	0	No Effect
ttc-ggdp[c]	-1.24993	-1.24993	9.99201e-15	No Effect
ttdca[h]	-0.69801	-0.69801	3.9968e-15	No Effect
tyr-L[c]	-0.211026	-0.211026	3.9968e-15	No Effect
tyr-L[h]	-0.211026	-0.211026	3.9968e-15	No Effect
tyr-L[m]	-0.211026	-0.211026	3.9968e-15	No Effect
tyr-Lso4[c]	-0.211026	-0.211026	3.9968e-15	No Effect
tyrtrna[c]	0	0	0	No Effect
uacgam[c]	-0.29219	-0.29219	5.9952e-15	No Effect
udg[m]	0	0	0	No Effect
udp[c]	-0.194794	-0.194794	1.9984e-15	No Effect
udp[g]	-0.194794	-0.194794	1.9984e-15	No Effect
udp[h]	-0.194794	-0.194794	9.99201e-16	No Effect
udp[m]	-0.194794	-0.194794	1.9984e-15	No Effect
udp[n]	-0.194794	-0.194794	1.9984e-15	No Effect
udparab[c]	-0.275958	-0.275958	5.9952e-15	No Effect
udparab[g]	-0.275958	-0.275958	5.9952e-15	No Effect
udpg[c]	-0.275958	-0.275958	5.9952e-15	No Effect
udpg[h]	-0.275958	-0.275958	3.9968e-15	No Effect
udpg[n]	-0.29219	-0.29219	4.996e-15	No Effect
udpgal[c]	-0.275958	-0.275958	5.9952e-15	No Effect
udpgal[g]	-0.275958	-0.275958	5.9952e-15	No Effect
udpgal[h]	-0.275958	-0.275958	3.9968e-15	No Effect
udpgalur[c]	-0.275958	-0.275958	5.9952e-15	No Effect
udpglcur[c]	-0.275958	-0.275958	5.9952e-15	No Effect
udpsq[h]	-0.275958	-0.275958	3.9968e-15	No Effect
udpxyl[c]	-0.275958	-0.275958	5.9952e-15	No Effect
ump[c]	-0.178561	-0.178561	2.9976e-15	No Effect
ump[h]	-0.178561	-0.178561	1.9984e-15	No Effect
upp1[h]	-1.57458	-1.57458	2.9976e-14	No Effect
upp3[h]	-1.54212	-1.54212	1.9984e-14	No Effect
uppg1[h]	-1.55835	-1.55835	1.9984e-14	No Effect
uppg3[h]	-1.55835	-1.55835	1.9984e-14	No Effect
ura[c]	-0.0324656	-0.0324656	4.996e-16	No Effect
urate[c]	-0.137979	-0.137979	5.9952e-15	No Effect
urate[e]	-0.137979	-0.137979	5.9952e-15	No Effect
urate[m]	-0.137979	-0.137979	5.9952e-15	No Effect
urcan[c]	-0.0486984	-0.0486984	2.09555e-15	No Effect
urdglyc[m]	-4.85404e-16	-6.38669e-17	4.21537e-16	No Effect
urea[c]	1.10175e-15	9.58004e-17	1.00595e-15	No Effect
urea[e]	4.85404e-16	6.38669e-17	4.21537e-16	No Effect
urea[m]	8.27839e-16	9.58004e-17	7.32038e-16	No Effect
uri[c]	-0.178561	-0.178561	2.9976e-15	No Effect
utp[c]	-0.194794	-0.194794	1.9984e-15	No Effect
utp[m]	-0.194794	-0.194794	1.9984e-15	No Effect
val-L[c]	-0.0324656	-0.0324656	2.10248e-15	No Effect
val-L[h]	-0.0324656	-0.0324656	2.10248e-15	No Effect
val-L[m]	-0.0324656	-0.0324656	2.40086e-15	No Effect
valtrna[c]	0	0	0	No Effect
valtrna[h]	0	0	0	No Effect
vioxan[u]	-2.49985	-2.49985	3.01981e-14	No Effect
vitd3[c]	0.0081164	0.0081164	1.45023e-15	No Effect
whddca[h]	-0.600613	-0.600613	2.9976e-15	No Effect
whhdca[h]	-0.146095	-0.146095	1.20182e-14	No Effect
whlnlc[h]	-0.178561	-0.178561	1.40166e-14	No Effect
whodce9a[h]	-0.178561	-0.178561	1.50158e-14	No Effect
whttdca[h]	-0.714243	-0.714243	2.9976e-15	No Effect
xan[c]	-0.137979	-0.137979	5.9952e-15	No Effect
xmp[c]	-0.284074	-0.284074	4.996e-15	No Effect
xmp[m]	-0.284074	-0.284074	5.9952e-15	No Effect
xtp[c]	-0.300307	-0.300307	5.9952e-15	No Effect
xtsn[c]	-0.284074	-0.284074	3.9968e-15	No Effect
xu5p-D[h]	-0.146095	-0.146095	1.9984e-15	No Effect
yvite[h]	-1.56646	-1.56646	1.9984e-14	No Effect
zaxan[u]	-2.49985	-2.49985	3.01981e-14	No Effect
zcaro[h]	2.46739	2.46739	3.01981e-14	No Effect
zxan[u]	-2.48362	-2.48362	3.01981e-14	No Effect
zymst[c]	-1.85054	-1.85054	1.9984e-14	No Effect
zymstnl[c]	-1.85054	-1.85054	1.9984e-14	No Effect

## Sheet: ST5
Shadow Price in iBD1106 for new metabolites when Biomass is objective Function
Metabolite	LNA	Dark
dlba[c]	0	0
kba[c]	-1.00753e-16	-2.06714e-17
cycp[e]	2.84557e-17	-1.64452e-17
cycp[c]	2.84557e-17	-1.64452e-17
cyc[e]	0	0
cyc[c]	0	0
d-ala[e]	-0.0373604	-0.0162328
d-ala[c]	-0.0373604	-0.0162328
d-aladala[e]	0	0
d-aladala[c]	0	0
D-aladala[c]	-0.0840608	-0.0486984
d-glu[c]	-0.0747207	-0.0486984
caaspn[e]	-0.0560405	-0.0486984
caaspn[c]	-0.0560405	-0.0486984
d-asp[e]	-0.0467004	-0.0324656
d-asp[c]	-0.0467004	-0.0324656
d-asn[e]	0	0
d-aspn[c]	0	0
d-asn[c]	-0.0560405	-0.0486984
d-glu[e]	-0.0747207	-0.0486984
d-lys[e]	-0.0934009	-0.0649312
d-lys[c]	-0.0934009	-0.0649312
kacop[e]	-0.0934009	-0.0649312
kacop[c]	-0.0934009	-0.0649312
d-srn[e]	-0.0373604	-0.0162328
d-srn[c]	-0.0373604	-0.0162328
phdsrn[e]	-0.0467004	-0.0324656
phdsrn[c]	-0.0467004	-0.0324656
d-val[e]	-0.0747207	-0.0324656
d-val[c]	-0.0747207	-0.0324656
moxob[e]	-0.0747207	-0.0324656
moxob[c]	-0.0747207	-0.0324656
d-lba[e]	0	0
d-lba[c]	0	0
kba[e]	-1.00753e-16	-2.06714e-17
lba-L[c]	0	0
Ala-Arg[c]	-0.121421	-0.081164
Ala-Arg[e]	-0.121421	-0.081164
Ala-Asn[c]	0	0
Ala-Asn[e]	0	0
Ala-His[c]	-0.168122	-0.194794
Ala-His[e]	-0.168122	-0.194794
Ala-Leu[c]	-0.130761	-0.0486984
Ala-Leu[e]	-0.130761	-0.0486984
Ala-Thr[c]	-0.0934009	-0.081164
Ala-Thr[e]	-0.0934009	-0.081164
Arg-Ala[c]	-0.121421	-0.081164
Arg-Ala[e]	-0.121421	-0.081164
Arg-Ile[c]	-0.186802	-0.227259
Arg-Ile[e]	-0.186802	-0.227259
Arg-Leu[c]	-0.177462	-0.0973968
Arg-Leu[e]	-0.177462	-0.0973968
Arg-Met[c]	-0.196142	-0.186677
Arg-Met[e]	-0.196142	-0.186677
Arg-Phe[c]	-0.242842	-0.211026
Arg-Phe[e]	-0.242842	-0.211026
Arg-Val[c]	-0.158782	-0.0973968
Arg-Val[e]	-0.158782	-0.0973968
Asp-Phe[c]	-0.242842	-0.211026
Asp-Trp[c]	-0.242842	-0.389587
Arg-Trp[e]	-0.242842	-0.389587
His-Tyr[c]	-0.289543	-0.389587
His-Tyr[e]	-0.289543	-0.389587
His-Val[c]	-0.205482	-0.211026
His-Val[e]	-0.205482	-0.211026
Ile-Arg[c]	-0.186802	-0.227259
Ile-Arg[e]	-0.186802	-0.227259
Ile-Gln[c]	-0.186802	-0.227259
Ile-Gln[e]	-0.186802	-0.227259
Ile-Ile[c]	-0.102741	-0.162328
Ile-Ile[e]	-0.102741	-0.162328
Ile-Met[c]	-0.214822	-0.284074
Ile-Met[e]	0	0
Ile-Phe[c]	-0.261523	-0.308423
Ile-Phe[e]	-0.261523	-0.308423
Ile-Tyr[c]	-0.261523	-0.373354
Ile-Tyr[e]	-0.261523	-0.373354
Leu-Ala[c]	-0.130761	-0.0486984
Leu-Ala[e]	-0.130761	-0.0486984
Leu-Arg[c]	-0.130761	-0.0486984
Leu-Arg[e]	-0.130761	-0.0486984
Leu-Asp[c]	-0.140101	-0.0649312
Leu-Asp[e]	-0.140101	-0.0649312
Leu-Glu[c]	-0.168122	-0.081164
Leu-Glu[e]	-0.168122	-0.081164
Leu-Gly[c]	0.102741	0.324656
Leu-Gly[e]	0.102741	0.324656
gly-L[c]	0.196142	0.357122
Leu-Ile[c]	-0.196142	-0.194794
Leu-Ile[e]	-0.196142	-0.194794
Leu-Leu[c]	-0.0934009	-0.0324656
Leu-Leu[e]	-0.0934009	-0.0324656
Leu-Met[c]	-0.205482	-0.154212
Leu-Met[e]	-0.205482	-0.154212
Leu-Ser[c]	-0.130761	-0.0486984
Leu-Ser[e]	-0.130761	-0.0486984
Leu-Trp[c]	-0.289543	-0.389587
Leu-Trp[e]	-0.289543	-0.389587
Leu-Val[c]	-0.168122	-0.0649312
Leu-Val[e]	-0.168122	-0.0649312
Met-Arg[c]	-0.196142	-0.186677
Met-Arg[e]	-0.196142	-0.186677
Met-Asp[c]	-0.158782	-0.154212
Met-Asp[e]	-0.158782	-0.154212
Met-Gln[c]	-0.196142	-0.186677
Met-Gln[e]	0	0
Met-Glu[c]	-0.186802	-0.170444
Met-Glu[e]	-0.186802	-0.170444
Met-Ile[c]	-0.214822	-0.284074
Met-Ile[e]	-0.214822	-0.284074
Met-Leu[c]	-0.205482	-0.154212
Met-Leu[e]	-0.205482	-0.154212
Met-Met[c]	-0.112081	-0.121746
Met-Met[e]	-0.112081	-0.121746
Met-Phe[c]	-0.270863	-0.267841
Met-Phe[e]	-0.270863	-0.267841
Met-Pro[c]	-0.196142	-0.186677
Met-Pro[e]	-0.196142	-0.186677
Met-Trp[c]	-0.308223	-0.478867
Met-Trp[e]	-0.308223	-0.478867
Phe-Ala[c]	-0.196142	-0.162328
Phe-Ala[e]	-0.196142	-0.162328
Phe-Ile[c]	-0.261523	-0.308423
Phe-Ile[e]	-0.261523	-0.308423
Phe-Pro[c]	-0.242842	-0.211026
Phe-Pro[e]	-0.242842	-0.211026
Phe-Ser[c]	-0.196142	-0.162328
Phe-Ser[e]	-0.196142	-0.162328
Pro-Ala[c]	-0.121421	-0.081164
Pro-Ala[e]	-0.121421	-0.081164
Pro-Asp[c]	-0.130761	-0.0973968
Pro-Asp[e]	-0.130761	-0.0973968
Pro-Gln[c]	-0.168122	-0.129862
Pro-Gln[e]	-0.168122	-0.129862
Pro-Gly[c]	0	0
Pro-Gly[e]	0	0
Pro-Hyp[c]	-0.0840608	-0.0649312
Pro-Hyp[e]	-0.0840608	-0.0649312
hyp-L[c]	0	0
hyp-L[e]	0	0
Pro-Leu[c]	-0.177462	-0.0973968
Pro-Leu[e]	-0.177462	-0.0973968
Pro-Phe[c]	-0.242842	-0.211026
Pro-Phe[e]	-0.242842	-0.211026
Ser-Ala[c]	-0.0747207	-0.0324656
Ser-Ala[e]	-0.0747207	-0.0324656
Ser-His[c]	-0.168122	-0.194794
Ser-His[e]	-0.168122	-0.194794
Ser-Met[c]	-0.149441	-0.137979
Ser-Met[e]	-0.149441	-0.137979
Ser-Phe[c]	-0.196142	-0.162328
Ser-Phe[e]	-0.196142	-0.162328
Ser-Pro[c]	-0.121421	-0.081164
Ser-Pro[e]	-0.121421	-0.081164
Ser-Ser[c]	-0.0373604	-0.0162328
Ser-Ser[e]	-0.0373604	-0.0162328
Thr-Ala[c]	-0.0934009	-0.081164
Thr-Ala[e]	-0.0934009	-0.081164
Thr-Met[c]	-0.168122	-0.186677
Thr-Met[e]	-0.168122	-0.186677
Trp-Ala[c]	-0.233502	-0.373354
Trp-Ala[e]	-0.233502	-0.373354
Trp-Arg[c]	-0.280203	-0.422053
Trp-Arg[e]	-0.280203	-0.422053
Trp-Glu[c]	-0.270863	-0.40582
Trp-Glu[e]	-0.270863	-0.40582
Trp-Gly[c]	0	0
Trp-Gly[e]	0	0
Trp-Tyr[c]	-0.354923	-0.568148
Trp-Tyr[e]	-0.354923	-0.568148
Tyr-Lys[c]	-0.252182	-0.275958
Tyr-Lys[e]	-0.252182	-0.275958
Tyr-Tyr[c]	-0.158782	-0.211026
Tyr-Tyr[e]	-0.158782	-0.211026
Val-Arg[c]	-0.158782	-0.0973968
Val-Arg[e]	-0.158782	-0.0973968
Val-Asn[c]	0	0
Val-Asn[e]	0	0
Val-His[c]	-0.205482	-0.211026
Val-His[e]	-0.205482	-0.211026
Val-Leu[c]	-0.168122	-0.0649312
Val-Leu[e]	-0.168122	-0.0649312
Ala-Asp[c]	-0.0840608	-0.0486984
Ala-Asp[e]	-0.0840608	-0.0486984
Ala-Ile[c]	-0.140101	-0.178561
Ala-Ile[e]	-0.140101	-0.178561
Ala-Met[c]	-0.149441	-0.137979
Ala-Met[e]	-0.149441	-0.137979
Ala-Val[c]	-0.112081	-0.0486984
Ala-Val[e]	-0.112081	-0.0486984
Asp-Ala[c]	-0.0840608	-0.0486984
Asp-Ala[e]	-0.0840608	-0.0486984
Asp-Gln[c]	-0.130761	-0.0973968
Asp-Gln[e]	-0.130761	-0.0973968
Asp-Gly[c]	0	0
Asp-Gly[e]	0	0
Glu-Ala[c]	-0.112081	-0.0649312
Glu-Ala[e]	-0.112081	-0.0649312
His-Ala[c]	-0.168122	-0.194794
His-Ala[e]	-0.168122	-0.194794
Ile-Asn[c]	-0.158782	-0.211026
Ile-Asn[e]	-0.158782	-0.211026
Ile-Leu[c]	-0.196142	-0.194794
Ile-Leu[e]	-0.196142	-0.194794
Leu-Asn[c]	-0.149441	-0.081164
Leu-Asn[e]	-0.149441	-0.081164
Leu-His[c]	-0.224162	-0.211026
Leu-His[e]	-0.224162	-0.211026
Leu-Pro[c]	-0.177462	-0.0973968
Leu-Pro[e]	-0.177462	-0.0973968
Phe-Glu[c]	-0.233502	-0.194794
Phe-Glu[e]	-0.233502	-0.194794
Phe-Met[c]	-0.270863	-0.267841
Phe-Met[e]	-0.270863	-0.267841
Pro-Arg[c]	-0.168122	-0.129862
Pro-Arg[e]	-0.168122	-0.129862
Pro-Asn[c]	-0.140101	-0.11363
Pro-Asn[e]	-0.140101	-0.11363
Pro-Ser[c]	-0.121421	-0.081164
Pro-Ser[e]	-0.121421	-0.081164
Ser-Asp[c]	-0.0840608	-0.0486984
Ser-Asp[e]	-0.0840608	-0.0486984
Ser-Gln[c]	-0.121421	-0.081164
Ser-Gln[e]	-0.121421	-0.081164
Ser-Glu[c]	-0.112081	-0.0649312
Ser-Glu[e]	-0.112081	-0.0649312
Trp-Val[c]	-0.270863	-0.389587
Trp-Val[e]	-0.270863	-0.389587
Val-Met[c]	-0.186802	-0.154212
Val-Met[e]	-0.186802	-0.154212
Val-Phe[c]	-0.233502	-0.178561
Val-Phe[e]	-0.233502	-0.178561
Leu-B-Ala[c]	-0.140101	-0.0649312
Leu-B-Ala[e]	-0.140101	-0.0649312
Leu-D-Leu[c]	-0.130761	-0.0486984
Leu-D-Leu[e]	-0.130761	-0.0486984
Phe-B-Ala[c]	-0.205482	-0.178561
Phe-B-Ala[e]	-0.205482	-0.178561
diala[c]	-0.0373604	-0.0162328
diala[e]	-0.0373604	-0.0162328
digly[c]	0.158782	0.211026
digly[e]	0.158782	0.211026
dileu[c]	-0.0934009	-0.0324656
dileu[e]	-0.0934009	-0.0324656
triAla[c]	-0.0747207	-0.0324656
triAla[e]	-0.0747207	-0.0324656
Leu-Gly-Gly[c]	0	0
Leu-Gly-Gly[e]	0	0
triLeu[c]	-0.186802	-0.0649312
triLeu[e]	-0.186802	-0.0649312
PheGlyGly[c]	0	0
PheGlyGly[e]	0	0
TyrGlyGly[c]	0	0
TyrGlyGly[e]	0	0
